# Supplementary material for: Soluble Fas ligand drives autoantibody-induced arthritis by binding to DR5/TRAIL-R2
Source: eLife. 2021 Jul 5;10:e48840. doi: 10.7554/eLife.48840 (PMC8257255; doi:10.7554/eLife.48840)
Supplement: Figure 1—source data 1. [file elife-48840-fig1-data1.xlsx]

## Sheet: Figure 1
Figure 1A	Ankle thickness (mm)
	Days	WT						Faslpr/lpr						Faslgld/gld						Fas-/-
	0	0	0	0	0	0	0	0	0	0	0	0	0	0	0	0	0	0	0	0	0	0	0	0
	1	0	0	0	0	0	0	0	0	0	0	0	0	0	0	0	0	0	0	0	0	0	0	0
	2	0.05	0.05	0.06	0.07	0.07	0.09	0.04	0.04	0.05	0.05	0.08	0.09	0	0	0	0	0	0	0.04	0.04	0.04	0.06	0.04
	3	0.14	0.14	0.16	0.18	0.23	0.24	0.12	0.13	0.16	0.16	0.17	0.21	0.03	0.05	0.05	0.05	0.07	0.08	0.17	0.35	0.22	0.18	0.21
	4	0.32	0.34	0.36	0.36	0.37	0.37	0.35	0.35	0.36	0.38	0.38	0.39	0.11	0.12	0.12	0.12	0.14	0.14	0.38	0.39	0.41	0.48	0.5
	5	0.67	0.68	0.7	0.71	0.74	0.77	0.68	0.69	0.71	0.74	0.75	0.8	0.17	0.17	0.18	0.19	0.2	0.23	0.59	0.75	0.76	0.76	0.94
	6	0.83	0.84	0.85	0.87	0.9	0.92	0.83	0.84	0.87	0.89	0.91	0.94	0.28	0.3	0.3	0.31	0.32	0.35	0.94	0.79	1.05	0.93	1.15
	7	0.89	0.89	0.89	0.92	0.95	0.99	0.91	0.91	0.95	0.96	0.98	1	0.43	0.45	0.45	0.51	0.55	0.9	1.02	0.88	1.12	1.1	1.19
	8	0.91	0.93	0.94	0.95	0.99	1	0.91	0.91	0.98	1	1.06	1.1	0.49	0.51	0.51	0.54	0.62	0.67	1.08	0.95	1.13	1.11	1.21
	9	0.92	0.94	0.96	0.98	1	1.1	0.92	0.93	0.99	1.03	1.08	1.13	0.5	0.55	0.57	0.59	0.63	0.67	1.08	0.95	1.12	1.12	1.22
	Clinical scores
	Days	WT						Faslpr/lpr						Faslgld/gld						Fas-/-
	0	0	0	0	0	0	0	0	0	0	0	0	0	0	0	0	0	0	0	0	0	0	0	0
	1	0	0	0	0	0	0	0	0	0	0	0	0	0	0	0	0	0	0	0	0	0	0	0
	2	0	0	0	0	0	0	0	0	0	0	0	0	0	0	0	0	0	0	0	0	1	2	1
	3	1	1	1	1	1.5	1.5	1	1	1.5	1.5	1.5	1.5	0	0	0	0	1	1	2	2	1.5	2.5	2
	4	2	2	2	2.5	3	3.5	2	2	2	2	2.5	3.5	0	0.5	0.5	1	1	1	3	3	3	4.5	3
	5	4.5	4.5	5	5.5	6	6	4.5	4.5	5	5.5	6	6	1	1	1	1.5	1.5	1.5	5	4.5	5	6	6.5
	6	6.5	6.5	6	7	7.5	7.5	6	6	6	6.5	7.5	7.5	2.5	2.5	2.5	2.5	3	3	8	6	7	8.5	7
	7	7	7	7	7.5	8	8	7	7.5	7.5	8	8.5	8.5	3.5	3.5	3.5	4	4.5	4.5	9	7	8	9	8
	8	7.5	7.5	8	8	9.5	9.5	7.5	7.5	8	9	9.5	9.5	4	4	4.5	4.5	5	5.5	9	7.5	8.5	10	9
	9	8	8	8	9	9	9.5	7.5	8	8.5	9.5	9.5	9.5	4	4.5	4.5	5	5.5	6	9.5	8	9	10	10
Figure 1B	Ankle thickness (mm)
	Days	WT						FaslΔs/Δs						FaslΔm/Δm						FaslΔs/Δs + sFasL
	0	0	0	0	0	0	0	0	0	0	0	0	0	0	0	0	0	0	0	0	0	0	0	0	0
	1	0	0	0.02	0.03	0.05	0.05	0	0	0	0	0	0	0	0	0	0.01	0.01	0.02	0	0	0	0.03	0.04	0.05
	2	0.05	0.05	0.08	0.09	0.1	0.13	0	0	0	0	0	0	0.03	0.03	0.05	0.05	0.06	0.09	0.05	0.08	0.09	0.1	0.11	0.12
	3	0.11	0.13	0.15	0.18	0.2	0.22	0.04	0.04	0.05	0.06	0.06	0.06	0.08	0.1	0.12	0.15	0.16	0.17	0.12	0.13	0.18	0.19	0.23	0.25
	4	0.23	0.26	0.29	0.31	0.32	0.34	0.09	0.1	0.12	0.13	0.15	0.15	0.22	0.23	0.25	0.28	0.29	0.3	0.2	0.21	0.25	0.29	0.32	0.38
	5	0.35	0.39	0.42	0.45	0.57	0.58	0.22	0.24	0.27	0.28	0.28	0.29	0.31	0.32	0.45	0.48	0.48	0.53	0.28	0.33	0.38	0.4	0.42	0.46
	6	0.56	0.62	0.69	0.73	0.79	0.82	0.32	0.36	0.38	0.39	0.4	0.41	0.52	0.53	0.54	0.54	0.54	0.55	0.45	0.52	0.56	0.58	0.6	0.62
	7	0.64	0.68	0.77	0.79	0.85	0.94	0.36	0.41	0.44	0.45	0.46	0.48	0.58	0.62	0.68	0.69	0.75	0.76	0.58	0.62	0.65	0.68	0.69	0.7
	8	0.69	0.73	0.85	0.93	0.99	1.08	0.37	0.45	0.47	0.49	0.5	0.52	0.62	0.78	0.82	0.88	0.89	0.95	0.72	0.73	0.75	0.75	0.79	0.82
	9	0.73	0.79	0.9	0.95	1.05	1.11	0.38	0.48	0.51	0.53	0.54	0.54	0.64	0.83	0.88	0.9	0.9	1.06	0.75	0.79	0.82	0.83	0.84	0.85
	10	0.74	0.83	0.92	0.97	1.08	1.12	0.38	0.49	0.52	0.53	0.55	0.55	0.65	0.9	0.92	0.95	0.97	1.09	0.81	0.82	0.83	0.85	0.86	0.87
	Clinical scores
	Days	WT						FaslΔs/Δs						FaslΔm/Δm						FaslΔs/Δs + sFasL
	0	0	0	0	0	0	0	0	0	0	0	0	0	0	0	0	0	0	0	0	0	0	0	0	0
	1	0	0	0	0	0	0	0	0	0	0	0	0	0	0	0	0	1	1	0	0.5	0.5	0	0.5	0.5
	2	0	1	1	1	1	1	0	0	0	0	0	0	0.5	0.5	0.5	1	1	1	1	1	1	1	1.5	1.5
	3	1	2	2	2	2	2	0	0	1	1	1	1	1	1	1	1.5	1.5	1.5	2	2	2	2	2.5	2.5
	4	2	2.5	2.5	2.5	2.5	2.5	1	1	1	1.5	2	2.5	3.5	4	4	4	4	4.5	3	3.5	3.5	3	3.5	4
	5	4	4.5	5	5	5	5.5	2	2	3	3	3	3	5	5	5	5.5	5.5	5.5	4	5.5	6	5	5	6
	6	6	8	8	8	8	8.5	3	3	3	3	5	5	6.5	6.5	6.5	7	7	7.5	6.5	7	7.5	7.5	8	8
	7	6.5	8	9	9	9	9	4	4	4.5	4.5	5.5	5.5	7	7.5	7.5	7.5	7.5	8	6.5	7.5	8	8.5	9.5	9.5
	8	7	8.5	9	9.5	9.5	10	4	4.5	5.5	5.5	6	6	7.5	8.5	8.5	8.5	8.5	9	7	8	9	9	10	10.5
	9	7	8.5	9	10	10	10	4	4.5	5	6	6	6	8	8.5	9	9	9	9	7	9	9.5	9.5	11	11
	10	7	9	9	10	10	10	4	4.5	4	6	6	6	8.5	9	9.5	9.5	9.5	9.5	8	10	10	9.5	10	11
Figure 1D	Hsitologic scores
	WT + PBS	FaslΔs/Δs + PBS	FaslΔs/Δs + sFasL
	7	1	6
	8	0	8
Figure 1F	Tnfrsf10b expression / Gapdh
	Control		AIA
	CD45+	CD45-	CD45+	CD45-
	0.00129029	0.005807	0.123874	54.2357
	0.0011757	2.6684	0.097305	38.5919
	0.001348	1.34192	0.135956	42.1196
Figure 1G	DR5 positive cells (cell number/HPF)
	Control	RA patient
	8.3	60
	4.3	36
	5	42

## Sheet: Figure 1 - figure supplement 1
Figure 1 - figure supplement 1C	Relative expression / Gapdh
		WT	Faslpr/lpr	Faslgld/gld	Fas-/-
	Il1b	1.27258	0.874019	0.0344744	1.09875
		1.25843	0.879727	0.297634	1.31067
		0.771169	1.38955	0.387318	1.26639
		0.697826	1.23587	0.465007	1.08794
		0.813356	1.15307	0.789694	0.187169
		0.672382	1.67924	0.418422	0.607367
	Il4	0.807487	0.854178	1.07614	1.01331
		1.33883	1.23338	0.806175	1.79557
		1.32412	1.07614	1.18467	1.36513
		0.529563	0.443382	0.367603	1.74692
		0.553707	0.547433	0.600391	2.0116
		0.438264	0.601359	0.381334	1.10959
	Il6	0.634001	1.25317	0.100797	1.75212
		0.866644	1.10288	0.073627	1.33756
		1.21488	0.590318	0.128339	1.1395
		1.28448	1.81073	0.520857	1.94805
		0.2743	1.90717	0.417682	0.361308
		0.296968	1.63908	0.380511	0.729883
	Tnfa	0.553395	0.449747	0.388797	1.10011
		1.76907	1.37954	0.405998	1.26378
		0.666214	1.14631	0.395303	1.03821
		1.01132	1.31024	0.32875	0.115832
		0.73056	1.78513	0.694183	1.06632
		0.40465	1.7169	0.573502	0.354842
	Tgfb	0.616044	0.781846	0.833553	1.07556
		0.762577	0.802732	0.801427	1.21844
		1.386	1.31632	1.17769	1.47885
		1.23537	1.22612	1.33095	1.31896
		0.115521	1.26295	0.210588	0.593461
		0.750783	1.02195	0.960818	0.983313
	Ccl2	1.10176	1.09401	0.0482958	1.29884
		1.19781	1.20458	0.602291	1.04519
		0.9416	1.19838	0.25741	1.89541
		0.758833	0.839486	0.375825	1.04667
		0.82639	1.51423	0.137594	1.22512
		0.613705	1.74127	0.020564	1.50356
	Ccl3	1.04194	1.249	0.596484	1.49196
		1.06462	1.1782	0.169915	1.80908
		0.758278	0.920438	0.255646	1.18483
		1.13517	0.796803	0.105674	0.0631499
		0.257099	0.739188	0.550144	2.11562
		0.231456	0.957155	0.159844	1.55716
	Cxcl10	0.996877	1.0372	0.457031	1.81239
		1.01445	1.00263	0.340987	1.48213
		1.02469	0.918361	0.380872	1.06494
		0.963981	0.616018	0.445643	0.411378
		0.572344	1.13701	0.566715	1.26508
		0.421632	0.535845	0.128297	0.589721
Figure 1 - figure supplement 1D	Ankle thickness (mm)
	Days	anti-FasL						anti-Fas						Isotype
	0	0	0	0	0	0	0	0	0	0	0	0	0	0	0	0	0	0	0
	1	0	0	0	0.01	0.01	0.01	0.01	0.02	0.01	0.01	0.02	0.01	0	0.01	0.01	0.01	0.01	0.02
	2	0.035	0.02	0.02	0.03	0.03	0.03	0.04	0.03	0.03	0.05	0.05	0.06	0.03	0.03	0.03	0.05	0.05	0.06
	3	0.07	0.17	0.15	0.09	0.09	0.09	0.11	0.1	0.1	0.12	0.12	0.05	0.1	0.11	0.12	0.12	0.13	0.17
	4	0.16	0.17	0.16	0.18	0.18	0.17	0.25	0.24	0.25	0.3	0.26	0.25	0.2	0.25	0.26	0.3	0.28	0.27
	5	0.27	0.28	0.29	0.29	0.28	0.28	0.38	0.4	0.41	0.43	0.42	0.38	0.4	0.41	0.42	0.42	0.41	0.43
	6	0.31	0.31	0.31	0.31	0.3	0.31	0.4	0.5	0.51	0.52	0.5	0.51	0.45	0.45	0.49	0.5	0.52	0.53
	7	0.41	0.4	0.41	0.43	0.42	0.41	0.5	0.55	0.56	0.66	0.68	0.55	0.55	0.55	0.67	0.6	0.65	0.65
	8	0.45	0.4	0.42	0.43	0.43	0.46	0.6	0.5	0.69	0.75	0.72	0.75	0.65	0.7	0.7	0.72	0.73	0.75
	9	0.48	0.49	0.5	0.51	0.46	0.49	0.65	0.8	0.72	0.73	0.71	0.72	0.7	0.75	0.72	0.75	0.75	0.8
	10	0.48	0.52	0.5	0.51	0.48	0.47	0.65	0.7	0.73	0.75	0.7	0.7	0.7	0.75	0.72	0.75	0.75	0.75
	Clinical scores
	Days	anti-FasL						anti-Fas						Isotype
	0	0	0	0	0	0	0	0	0	0	0	0	0	0	0	0	0	0	0
	1	0	0	0	0	0	0	0	0.5	0.5	1	0.5	0.5	0	1	1	1	0.5	0.5
	2	0.5	0.5	0.5	0.5	0.5	1	0.5	1	1	1.5	2	1.5	1.5	1.5	1	1.5	2	1.5
	3	1	0.5	0.5	0.5	1	1	2	3	3	3	3	3.5	3	3	3	3	3.5	2.5
	4	2.5	1	1	1	1	1.5	2.5	3	3.5	4	4	4.5	3.5	4.5	4.5	4	3	3
	5	3	2	1.5	2	2	2	5	5	5.5	5.5	6	6	5.5	6	5.5	6	6	5.5
	6	2.5	3	2	2.5	2.5	3	6	6	6	6.5	6.5	7	6	6.5	6	6.5	7	7
	7	3.5	2.5	3	2.5	3	3	7	6.5	7	7	7.5	7	7	7.5	7	7.5	7.5	7.5
	8	3	3.5	3	3	3	3.5	7	7.5	7.5	8	8	8	7.5	7.5	8	7.5	8	8
	9	3.5	3.5	3	3.5	4	4	7.5	8	8	8	8	8	8	8	8.5	8	8	8.5
	10	4	4	3.5	3	3	4	7.5	8	8	8	8	8.5	8	8	8.5	8	8	8.5
Figure 1 - figure supplement 1E	Relative expression / Gapdh
		Isotype	anti-Fas	anti-FasL
	Il1b	1.13915	0.797227	0.397172
		1.18088	0.853065	0.722273
		0.636722	0.890503	0.433101
		1.04324	1.20498	0.511164
		0.870375	0.829897	0.391512
		0.721125	1.57956	0.467671
	Il4	0.779753	0.618049	0.780016
		0.863263	0.047723	0.520383
		1.15341	1.62694	1.23446
		0.203575	1.12834	1.40555
		0.158811	0.820158	0.110166
		0.170475	0.866035	0.78376
	Il6	1.12499	1.2646	0.144162
		1.4068	1.05606	0.747081
		1.06956	0.564933	0.59559
		0.398656	1.33358	0.211764
		0.736461	1.232	0.299337
		0.400883	0.772366	0.818736
	Tnfa	1.30818	1.15008	0.296073
		0.297483	1.35751	0.033937
		1.16692	0.601438	0.017776
		1.22742	1.26332	0.689788
		0.154467	1.12338	0.292239
		0.133773	0.882625	0.992541
	Tgfb	1.45444	0.432873	0.264962
		1.28246	1.13751	1.14965
		0.992922	1.26224	1.23531
		0.270179	1.0554	0.976489
		0.397938	1.15165	0.538398
		0.213009	1.09772	0.256321
	Ccl2	0.574022	1.26681	0.524986
		0.939925	1.17637	0.468743
		1.18679	0.65153	0.463103
		1.29926	0.253847	0.514193
		0.50199	0.442814	0.071934
		0.321597	0.903647	0.661969
	Ccl3	1.11655	0.693267	0.698601
		1.2493	1.01015	0.435229
		0.886689	1.18656	0.789001
		0.747461	1.16782	0.533817
		0.96509	0.496486	0.888379
		0.504353	0.952144	0.183955
	Cxcl10	1.06095	1.3307	0.940367
		0.936019	1.21551	0.882377
		1.02905	1.23881	0.614548
		0.973982	0.931145	0.219235
		0.984478	0.944628	0.167902
		0.0796769	0.9731	0.90961
Figure 1 - figure supplement 1F	sFasL (pg/mL)
	WT	WT AIA	FaslΔm/Δm AIA	FaslΔs/Δs AIA
	11.294	128.321	104.419	31.495
	43.218	109.255	85.501	20.15
	39.351	115.541	94.265	27.051
Figure 1 - figure supplement 1G	Ankle thickness (mm)
	Days	PBS						sFasL
	0	0	0	0	0	0	0	0	0	0	0	0	0
	1	0	0	0	0	0	0	0	0	0	0	0	0
	2	0	0	0	0	0	0	0.04	0.05	0.07	0.08	0.09	0.09
	3	0.03	0.03	0.04	0.05	0.06	0.06	0.1	0.13	0.15	0.15	0.19	0.2
	4	0.08	0.08	0.09	0.1	0.11	0.13	0.21	0.23	0.26	0.28	0.3	0.31
	5	0.15	0.16	0.18	0.18	0.22	0.24	0.36	0.38	0.4	0.42	0.46	0.48
	6	0.26	0.27	0.33	0.39	0.4	0.41	0.57	0.58	0.64	0.66	0.69	0.68
	7	0.29	0.33	0.39	0.4	0.43	0.44	0.65	0.69	0.7	0.73	0.79	0.84
	8	0.31	0.36	0.42	0.43	0.44	0.46	0.69	0.74	0.78	0.82	0.85	0.89
	9	0.32	0.38	0.43	0.44	0.46	0.47	0.74	0.77	0.82	0.83	0.92	0.94
	10	0.32	0.4	0.44	0.45	0.46	0.47	0.76	0.8	0.83	0.88	0.94	0.95
	Clinical scores
	Days	PBS						sFasL
	0	0	0	0	0	0	0	0	0	0	0	0	0
	1	0	0	0	0	0	0	0	0	0	0	0.5	0.5
	2	0	0	0	0	0	0	0.5	0.5	0.5	0.5	1	1
	3	0.5	0.5	0.5	0.5	1	1	1	1	1	1	1.5	1.5
	4	1	1	1	1	1.5	2	2	2	2	2	2	2
	5	2	2	2.5	3	3.5	3.5	4	4	4	4	4.5	4.5
	6	3	3	3.5	3.5	4.5	4.5	5.5	5.5	6	6	6.5	7
	7	3.5	4	4	4	4.5	5	6.5	7	7	7	7.5	7.5
	8	4	4	4	4	4.5	5	7	7	7	7	7.5	8
	9	4	4	4	4	4.5	5	7	7	7.5	8	8	8
	10	4	4	4.5	4.5	4.5	5	7	7	7.5	8	8	8
Figure 1 - figure supplement 1H	Relative expression / Gapdh
		PBS	sFasL
	Il1b	0.465634	5.18341
		0.648528	5.72933
		1.22086	7.71698
		1.66498	8.23666
		1.28534	4.24393
		0.885634	6.27478
	Il4	0.88697	1.287
		0.925602	1.54263
		1.06943	1.57289
		1.118	1.90887
		0.594558	1.73248
		1.37588	1.1607
	Il6	0.651288	2.7065
		0.698235	3.78173
		1.25401	3.95424
		1.39647	4.08025
		0.936484	4.10458
		1.02264	3.19437
	Tnfa	0.293047	2.27588
		0.879141	2.34164
		0.942604	2.35732
		1.88521	3.36678
		0.679381	3.42704
		0.687624	2.00409
	Tgfb	0.558791	1.74626
		0.802684	1.82437
		1.05781	2.29126
		1.58072	2.40593
		1.45422	2.37714
		0.462286	2.65739
Figure 1 - figure supplement 1I	Relative expression / Gapdh
		WT + PBS	FaslΔs/Δs + PBS	FaslΔs/Δs + sFasL
	Il1b	0.829186	0.284443	0.878241
		0.994889	0.341331	0.90859
		0.995024	0.711285	0.929729
		0.93174	0.055519	0.98697
		0.780717	0.60358	1.19952
		0.340454	0.492081	0.900429
	Il4	0.937939	0.894886	1.15762
		1.1242	0.218748	0.639784
		1.39208	0.492694	0.567304
		0.345775	1.29878	1.09249
		0.564985	0.586125	1.29137
		0.591414	0.671588	1.34847
	Il6	0.858725	0.344832	0.983461
		0.858728	0.413798	0.996131
		1.38368	0.542123	1.09807
		1.32049	0.53278	1.23674
		1.34863	0.87497	1.27634
		0.820755	0.781813	1.89805
	Tnfa	1.21855	0.293931	1.08631
		1.3081	0.341496	1.09279
		0.71669	0.779115	0.682796
		0.897013	0.261989	0.86195
		1.34567	0.594317	1.07048
		1.0593	0.621869	1.19216
	Tgfb	0.925988	0.924812	1.30286
		1.36102	1.10977	0.932578
		1.05505	1.17144	1.08638
		1.02326	1.13641	1.12106
		0.63387	0.236015	1.54179
		1.11101	0.263356	0.816948
Figure 1 - figure supplement 1J	Ankle thickness
	Days	WT + PBS			WT + sFasL			Fas KO + PBS			Fas KO + sFasL
	0	0	0	0	0	0	0	0	0	0	0	0	0
	1	0	0	0	0	0	0	0	0	0	0	0	0
	2	0	0	0	0	0	0	0	0	0	0	0	0
	3	0.08	0.09	0.1	0.12	0.15	0.2	0.02	0.05	0.09	0.21	0.26	0.46
	4	0.15	0.17	0.18	0.25	0.33	0.45	0.13	0.15	0.16	0.47	0.49	0.58
	5	0.25	0.26	0.26	0.52	0.59	0.63	0.25	0.31	0.33	0.5	0.68	0.71
	6	0.45	0.48	0.49	0.65	0.71	0.75	0.48	0.54	0.55	0.62	0.72	0.92
	7	0.68	0.72	0.74	0.99	1.04	1.06	0.68	0.74	0.88	0.93	1.02	1.13
	8	0.77	0.82	0.88	1.12	1.14	1.21	0.79	0.91	0.92	1.01	1.18	1.24
	9	0.82	0.88	0.93	1.1	1.22	1.24	0.75	0.87	0.92	1.15	1.19	1.26
	10	0.86	0.89	0.95	1.11	1.29	1.31	0.79	0.91	0.94	1.13	1.28	1.31
	Clinical scores
	Days	WT + PBS			WT + sFasL			Fas KO + PBS			Fas KO + sFasL
	0	0	0	0	0	0	0	0	0	0	0	0	0
	1	0	0	0	0	0	0	0	0	0	0	0	0
	2	0	0	0	0	0	0	0	0	0	0	0	0
	3	0	1	0	1	1	1	0	1	1.5	2	1	2
	4	1	2	2	3	4.5	5	1	2	3.5	3	4	5.5
	5	3	3	4	6	6.5	7	3	4	4.5	6	6.5	8
	6	5	5	6	7	8	8.5	6	6.5	6.5	8	9	9
	7	5.5	6.5	7	9.5	9	10	7	7	7	9	10	10
	8	6.5	7	8	10	10.5	10	7.5	7	7.5	10	11	10
	9	7	8	8	10	10	11	8	7.5	8	10.5	11	10
	10	7	8	8.5	10	11	11.5	8	8	8.5	11	11.5	12
Figure 1 - figure supplement 1K	Ankle thickness
	Days	Uninjected						WT splenocytes						Faslgld/gld splenocytes
	0	0	0	0	0	0	0	0	0	0	0	0	0	0	0	0	0	0	0
	1	0	0	0	0	0	0	0	0	0	0	0	0	0	0	0	0	0	0
	2	0.01	0.03	0.03	0.04	0.05	0.07	0.06	0.08	0.09	0.09	0.1	0.14	0.01	0.04	0.05	0.05	0.07	0.08
	3	0.05	0.09	0.1	0.1	0.12	0.13	0.15	0.18	0.19	0.21	0.24	0.25	0.07	0.09	0.1	0.1	0.13	0.14
	4	0.1	0.15	0.15	0.16	0.2	0.21	0.27	0.32	0.32	0.35	0.38	0.41	0.13	0.16	0.16	0.16	0.18	0.18
	5	0.17	0.2	0.21	0.22	0.22	0.25	0.41	0.44	0.45	0.46	0.48	0.49	0.2	0.23	0.24	0.24	0.27	0.28
	6	0.25	0.29	0.29	0.29	0.31	0.32	0.62	0.67	0.68	0.68	0.72	0.75	0.27	0.3	0.3	0.31	0.34	0.35
	7	0.35	0.37	0.38	0.39	0.42	0.44	0.7	0.73	0.74	0.75	0.76	0.79	0.35	0.38	0.39	0.39	0.41	0.43
	8	0.37	0.4	0.42	0.42	0.45	0.47	0.8	0.85	0.86	0.87	0.89	0.9	0.39	0.4	0.41	0.41	0.42	0.45
	9	0.38	0.45	0.46	0.46	0.51	0.55	0.82	0.9	0.9	0.91	0.91	0.93	0.4	0.42	0.44	0.44	0.45	0.47
	10	0.38	0.45	0.46	0.47	0.49	0.59	0.82	0.9	0.91	0.91	0.93	0.97	0.4	0.46	0.47	0.48	0.49	0.49
	Clinical scores
	Days	Uninjected						WT splenocytes						Faslgld/gld splenocytes
	0	0	0	0	0	0	0	0	0	0	0	0	0	0	0	0	0	0	0
	1	0	0	0	0	0	0	0	0	0	0	0	0	0	0	0	0	0	0
	2	1	1	1	1.5	1.5	1.5	1	1	1	1	1	1	0.5	0.5	0.5	0.5	1	1.5
	3	1.5	1.5	1.5	2	2	2	2	2	2.5	3	3	3	1.5	1.5	1.5	1.5	2	2
	4	2	2	2	2.5	2.5	2.5	4	4.5	5	5	5.5	6	1.5	1.5	2	2	2	2
	5	2	2	2.5	2.5	2.5	3	7	7	7.5	8	8	8	2	2	2.5	2.5	2.5	2.5
	6	2.5	2.5	3	3	3.5	4	8	8	8	8.5	8.5	8.5	2	2	2.5	2.5	2.5	2.5
	7	3	3	3	3.5	3.5	4	9	9	9	9	9	9	2.5	3	3	3	3	3
	8	4	4	4	4	4	4.5	9.5	9.5	9.5	10	10	10	3	3	3	3	3	3
	9	4	4	4	4.5	4.5	4.5	10	10	10	10	10	10	3	3	3	3	3.5	3.5
	10	4	4	4.5	4.5	5	5	10	10	10	10	10	10	3	3	3.5	3.5	4	4

## Sheet: Figure 1 - figure supplement 2
Figure 1 - figure supplement 2H	Relative expression / GAPDH
	TNFRSF10B
	Control	hFasL	hTRAIL	hDR5	hFas	hTNF
	0	0	0	5.93222	0	0
	0	0	0	5.34855	0	0
	0	0	0	5.71807	0	0
	0	0	0	1.60381	0	0
	FAS
	Control	hFasL	hTRAIL	hDR5	hFas	hTNF
	0	0	0	0	8.74385	0
	0	0	0	0	5.93068	0
	0	0	0	0	2.66011	0
	0	0	0	0	7.67083	0

## Sheet: Figure 1 - figure supplement 3
Figure 1 - figure supplement 3A	CX3CL1 (ng/mL)
	Human FLSC
	Isotype	FasL + isotype	FasL + anti-hFas	FasL + anti-hDR5	FasL + anti-mFas	FasL + anti-mDR5
	0	534.628	354.173	334.839	586.186	367.063
	19.044	715.082	663.52	160.829	321.949	566.852
	0	541.072	586.186	180.164	689.303	560.407
	0	521.738	611.965	96.381	328.394	689.303
	Mouse synovial fibroblasts
	Isotype	FasL + isotype	FasL + anti-hFas	FasL + anti-hDR5	FasL + anti-mFas	FasL + anti-mDR5
	0	428.6	396.2	367.06	398	329.3
	25.8	639.1	450.8	566.85	520.7	201.7
	0	521.4	556.6	560.4	439.7	108.9
	0	321	496.4	689.3	605.8	320.7

## Sheet: Figure 1 - figure supplement 4
Figure 1 - figure supplement 4B	Relative expression / GAPDH
		si-Control				si-FAS				si-TNFRSF10B				si-TNFRSF1A				si-TNFRSF10A				si-TNFRSF12
	FAS	1.32191	1.07487	0.683431	0.919792	0.201992	0.197772	0.386036	0.497496	0.083928	0.869292	1.38713	1.4005	0.693912	0.934215	0.771396	0.909132	1.18462	1.37721	0.413471	1.25622	0.651705	0.856351	0.936198	0.770865
	TNFRSF10B	1.03825	0.880466	1.04595	1.03534	0.99884	0.864389	1.09354	0.100571	0.067428	0.218272	0.309826	0.179008	0.716375	0.924694	0.849616	1.27334	0.780326	0.471558	1.05304	1.02098	0.984601	0.863678	0.879102	0.772815
	TNFRSF1A	0.812494	1.27605	0.908489	0.852391	0.938038	0.985515	0.889281	0.816691	0.895226	0.8806	0.977661	0.812448	0.104082	0.347625	0.612451	0.440225	0.698312	0.804397	0.959501	0.929027	0.70325	0.944054	0.981665	0.782931
	TNFRSF10A	0.692431	1.00228	1.26387	1.04143	0.819313	0.992341	0.956877	1.02926	1.04578	1.02076	1.17366	0.650458	0.989216	0.83115	1.16737	1.06145	0.293004	0.330202	0.036869	0.205872	0.762125	0.816038	0.959782	0.89005
	TNFRSF12	1.17319	0.828901	0.492464	0.966416	0.905966	0.952396	0.804186	0.915972	0.789322	0.980716	0.967598	0.838899	0.885138	0.983033	0.864265	0.882241	0.976533	0.823004	0.832727	0.880613	0.188024	0.556087	0.294958	0.178908
Figure 1 - figure supplement 4C	Relative expression / GAPDH
	TNFRSF10B	sgControl	FAS KO	TNFRSF10B KO	DKO	DKO + FAS	DKO + TNFRSF10B	DKO + TNFRSF10B + FAS
		1.04161	0.898912	0	0	0	0.879091	0.819745
		1.25196	1.18966	0	0	0	0.765222	0.958586
		1.13832	0.906492	0	0	0	0.970931	0.764143
		0.568108	1.20078	0	0	0	0.994174	0.746431
	FAS	sgControl	FAS KO	TNFRSF10B KO	DKO	DKO + FAS	DKO + TNFRSF10B	DKO + TNFRSF10B + FAS
		0.963535	0	1.17892	0	0.963047	0	0.880733
		0.764111	0	0.906172	0	0.882749	0	0.808065
		1.16394	0	1.19954	0	0.793415	0	0.905119
		1.10841	0	1.2011	0	0.998714	0	0.908997
Figure 1 - figure supplement 4F	Time	Relative response (RU)
		sFasL 125nM - Raw	sFasL 125nM - Fitted	sFasL 250nM - Raw	sFasL 250nM - Fitted	sFasL 500nM - Raw	sFasL 500nM - Fitted	sFasL 1000nM - Raw	sFasL 1000nM - Fitted
	-60.08	0.324219	0	0.233887	0	-0.02368	0	0.276123	0
	-59.98	0.12915	0	-0.08081	0	-0.07057	0	0.138916	0
	-59.88	0.121826	0	-0.54736	0	-0.36914	0	-0.03955	0
	-59.78	-0.106934	0	-0.27002	0	-0.11132	0	0.119141	0
	-59.68	0.0219727	0	0.080811	0	-0.02295	0	0.253418	0
	-59.58	-0.264648	0	-0.13013	0	-0.23779	0	-0.32446	0
	-59.48	-0.249023	0	-0.30566	0	-0.1206	0	-0.08081	0
	-59.38	0.179688	0	0.017578	0	-0.0957	0	0.047119	0
	-59.28	0.132324	0	0.133301	0	0.01074	0	-0.06982	0
	-59.18	-0.17334	0	-0.08862	0	-0.16821	0	-0.26978	0
	-59.08	0.330566	0	-0.08228	0	0.095703	0	0.192627	0
	-58.98	0.0585938	0	-0.22315	0	-0.05347	0	0.115967	0
	-58.88	0.115723	0	-0.24731	0	-0.20337	0	-0.35498	0
	-58.78	-0.145996	0	0.074707	0	-0.01832	0	0.111328	0
	-58.68	0.0471191	0	-0.17212	0	-0.06274	0	-0.12671	0
	-58.58	0.175781	0	-0.28394	0	-0.12915	0	-0.03564	0
	-58.48	-0.145996	0	-0.42139	0	-0.11279	0	-0.01221	0
	-58.38	-0.0224609	0	-0.53174	0	-0.09009	0	-0.33252	0
	-58.28	-0.252197	0	-0.4856	0	-0.35424	0	-0.40649	0
	-58.18	0.0932617	0	-0.02612	0	-0.15576	0	-0.14478	0
	-58.08	-0.198242	0	0.010498	0	-0.38696	0	-0.08472	0
	-57.98	0.160156	0	0.036377	0	-0.0481	0	0.315918	0
	-57.88	0.175293	0	-0.44482	0	-0.34009	0	-0.04883	0
	-57.78	-0.0771484	0	-0.29712	0	-0.28467	0	0.057617	0
	-57.68	0.0805664	0	-0.04419	0	-0.14404	0	0.169922	0
	-57.58	-0.196777	0	-0.41919	0	-0.21045	0	-0.00659	0
	-57.48	-0.0693359	0	-0.28638	0	-0.25268	0	-0.03076	0
	-57.38	-0.0185547	0	-0.14648	0	-0.25732	0	0.011231	0
	-57.28	-0.107666	0	0.110596	0	-0.11034	0	0.011475	0
	-57.18	-0.0107422	0	-0.13232	0	-0.06665	0	0.126953	0
	-57.08	-0.367188	0	-0.29102	0	-0.50342	0	-0.28711	0
	-56.98	-0.0466309	0	-0.03467	0	0.110596	0	0.041748	0
	-56.88	-0.111572	0	-0.13306	0	0.144287	0	0.264404	0
	-56.78	-0.116943	0	-0.15332	0	-0.03296	0	0.331055	0
	-56.68	-0.0412598	0	-0.50366	0	-0.04492	0	-0.10815	0
	-56.58	0.111816	0	0.141113	0	0.299805	0	0.31543	0
	-56.48	-0.000732	0	-0.11523	0	0.25903	0	0.311279	0
	-56.38	0.148438	0	0.134766	0	-0.15259	0	0.112061	0
	-56.28	-0.251465	0	-0.33789	0	-0.09643	0	-0.45728	0
	-56.18	0.231445	0	0.121582	0	-0.07129	0	-0.30029	0
	-56.08	-0.0678711	0	-0.04883	0	-0.08228	0	-0.20435	0
	-55.98	0.10791	0	-0.07153	0	-0.13159	0	0.114502	0
	-55.88	0.0283203	0	0.06543	0	-0.2002	0	-0.20654	0
	-55.78	-0.297607	0	-0.49268	0	-0.33642	0	-0.06128	0
	-55.68	0.157227	0	-0.25659	0	0.131104	0	0.114502	0
	-55.58	0.163574	0	-0.19629	0	-0.19775	0	0.059082	0
	-55.48	-0.161621	0	-0.47144	0	-0.2495	0	-0.25195	0
	-55.38	0.0539551	0	0.065918	0	0.038818	0	0.134033	0
	-55.28	-0.0288086	0	-0.1543	0	-0.2207	0	-0.28467	0
	-55.18	0.0180664	0	0.00269	0	-0.2207	0	-0.04028	0
	-55.08	-0.213135	0	-0.12915	0	-0.05493	0	0.066895	0
	-54.98	-0.03125	0	-0.2019	0	-0.21435	0	-0.02612	0
	-54.88	-0.215576	0	-0.22461	0	-0.17139	0	-0.25269	0
	-54.78	-0.0512695	0	-0.12842	0	0.084225	0	0.00684	0
	-54.68	0.00171	0	-0.08398	0	-0.25586	0	0.134033	0
	-54.58	-0.0910645	0	-0.13452	0	-0.12598	0	-0.15796	0
	-54.48	-0.0686035	0	0.018555	0	0.018557	0	-0.17212	0
	-54.38	-0.00464	0	-0.12305	0	-0.13867	0	0.162842	0
	-54.28	-0.112305	0	-0.14648	0	-0.23461	0	-0.07153	0
	-54.18	0.126709	0	0.189453	0	-0.16846	0	-0.00439	0
	-54.08	-0.172363	0	-0.20972	0	-0.43457	0	-0.16675	0
	-53.98	-0.27002	0	-0.36279	0	-0.42921	0	0.070801	0
	-53.88	-0.295166	0	-0.53784	0	-0.4502	0	-0.31836	0
	-53.78	-0.135742	0	-0.00269	0	-0.33618	0	-0.14478	0
	-53.68	-0.000732	0	-0.24243	0	-0.3667	0	-0.44946	0
	-53.58	-0.0461426	0	-0.26367	0	-0.41602	0	-0.23169	0
	-53.48	-0.353027	0	-0.17456	0	-0.80956	0	-0.28467	0
	-53.38	0.0236816	0	0.156006	0	-0.21045	0	0.048096	0
	-53.28	-0.405273	0	-0.39575	0	-0.38158	0	0.00342	0
	-53.18	-0.337402	0	-0.26148	0	-0.14111	0	0.200439	0
	-53.08	-0.445068	0	-0.44946	0	-0.35327	0	-0.36353	0
	-52.98	-0.283447	0	-0.29565	0	-0.552	0	-0.27612	0
	-52.88	-0.340332	0	-0.28394	0	-0.19238	0	-0.26123	0
	-52.78	-0.403076	0	-0.44482	0	-0.26366	0	-0.2417	0
	-52.68	0.117432	0	-0.08862	0	-0.16357	0	0.180176	0
	-52.58	0.0102539	0	0.065918	0	0.109131	0	0.376221	0
	-52.48	-0.0185547	0	0.115234	0	0.243411	0	0.195068	0
	-52.38	0.135254	0	0.212158	0	-0.02832	0	0.053467	0
	-52.28	-0.276611	0	-0.25122	0	-0.2456	0	-0.09424	0
	-52.18	-0.13501	0	-0.36499	0	-0.03076	0	-0.24097	0
	-52.08	-0.212402	0	-0.20825	0	-0.22461	0	-0.13696	0
	-51.98	-0.134277	0	0.041016	0	0.014644	0	0.00122	0
	-51.88	-0.307617	0	-0.34497	0	-0.10107	0	-0.08862	0
	-51.78	0.225098	0	0.054932	0	-0.06593	0	0.244873	0
	-51.68	-0.107666	0	-0.01294	0	0.013672	0	-0.00122	0
	-51.58	-0.0717773	0	-0.21143	0	-0.17773	0	-0.41602	0
	-51.48	0.015625	0	-0.01294	0	0.08251	0	-0.06519	0
	-51.38	-0.163818	0	-0.17065	0	-0.23535	0	-0.11206	0
	-51.28	0.0446777	0	-0.22534	0	-0.24951	0	-0.05884	0
	-51.18	-0.258545	0	-0.22534	0	-0.42139	0	-0.10205	0
	-51.08	-0.0795898	0	-0.29028	0	-0.31274	0	-0.01294	0
	-50.98	-0.276367	0	-0.41675	0	-0.39868	0	-0.32837	0
	-50.88	0.00879	0	0.055908	0	-0.33691	0	-0.15503	0
	-50.78	-0.00928	0	-0.25269	0	-0.29566	0	-0.16065	0
	-50.68	-0.213867	0	-0.53687	0	0.02002	0	-0.47925	0
	-50.58	-0.344482	0	-0.28955	0	-0.36914	0	-0.45117	0
	-50.48	0.133789	0	-0.22607	0	-0.05884	0	-0.00732	0
	-50.38	0.218262	0	-0.0166	0	0.031006	0	0.00513	0
	-50.28	0.116699	0	-0.23535	0	-0.1416	0	-0.36499	0
	-50.18	-0.0585938	0	-0.24023	0	-0.50049	0	-0.36206	0
	-50.08	0.0258789	0	-0.39331	0	-0.40112	0	-0.24976	0
	-49.98	0.158691	0	0.011475	0	0.074703	0	0.043457	0
	-49.88	-0.0786133	0	-0.1416	0	0.120117	0	-0.04248	0
	-49.78	0.0314941	0	0.00366	0	0.214594	0	-0.0957	0
	-49.68	-0.0959473	0	-0.13794	0	0.154297	0	-0.20264	0
	-49.58	0.0244141	0	-0.2207	0	-0.00879	0	-0.27148	0
	-49.48	-0.189697	0	-0.13477	0	0.012944	0	-0.46606	0
	-49.38	-0.236572	0	-0.07153	0	0.119873	0	-0.27856	0
	-49.28	0.108887	0	-0.10815	0	-0.16969	0	0.242676	0
	-49.18	-0.41626	0	-0.42139	0	-0.24878	0	-0.35889	0
	-49.08	-0.16626	0	-0.54639	0	0.023926	0	-0.48389	0
	-48.98	-0.0678711	0	-0.12158	0	-0.05029	0	-0.18408	0
	-48.88	-0.150635	0	-0.1604	0	-0.15967	0	-0.00342	0
	-48.78	-0.133545	0	-0.302	0	-0.06836	0	-0.13232	0
	-48.68	-0.0827637	0	-0.39258	0	-0.2832	0	-0.13794	0
	-48.58	-0.0419922	0	-0.2019	0	-0.0481	0	0.120605	0
	-48.48	-0.0466309	0	-0.15332	0	-0.13136	0	-0.28613	0
	-48.38	-0.241943	0	-0.48633	0	-0.34082	0	-0.323	0
	-48.28	-0.0507813	0	-0.37769	0	-0.12697	0	-0.2544	0
	-48.18	-0.409424	0	-0.47461	0	-0.54028	0	-0.63403	0
	-48.08	-0.347656	0	-0.30127	0	-0.38013	0	-0.28882	0
	-47.98	0.079834	0	-0.29956	0	-0.23388	0	-0.30493	0
	-47.88	-0.115479	0	-0.16357	0	-0.04565	0	-0.20898	0
	-47.78	-0.371582	0	-0.18848	0	-0.18066	0	-0.32373	0
	-47.68	-0.226563	0	-0.0896	0	0.017578	0	-0.12305	0
	-47.58	-0.122559	0	-0.11304	0	-0.2832	0	-0.28565	0
	-47.48	-0.330322	0	-0.23706	0	-0.4353	0	-0.06738	0
	-47.38	-0.179443	0	-0.23145	0	-0.36353	0	-0.10962	0
	-47.28	-0.113281	0	-0.11987	0	0.352037	0	0.087158	0
	-47.18	-0.118652	0	-0.43384	0	-0.21509	0	-0.01367	0
	-47.08	-0.184326	0	-0.58862	0	-0.18018	0	-0.1731	0
	-46.98	-0.385742	0	-0.54956	0	-0.29712	0	-0.17383	0
	-46.88	0	0	-0.17383	0	-0.12231	0	-0.06201	0
	-46.78	0.116455	0	-0.16821	0	-0.14478	0	0.132568	0
	-46.68	-0.0820313	0	-0.09497	0	-0.12061	0	-0.17944	0
	-46.58	-0.124268	0	-0.37158	0	-0.23779	0	-0.30835	0
	-46.48	-0.0905762	0	-0.12476	0	-0.12451	0	0.037842	0
	-46.38	0.00171	0	-0.39185	0	-0.03784	0	-0.14014	0
	-46.28	0.167969	0	-0.0896	0	-0.05518	0	0.192627	0
	-46.18	-0.102295	0	-0.19727	0	-0.26587	0	-0.06836	0
	-46.08	0.118164	0	0.168457	0	-0.11816	0	-0.02905	0
	-45.98	0.143066	0	-0.08569	0	0.204337	0	-0.06372	0
	-45.88	-0.0654297	0	0.00195	0	0.086426	0	-0.05737	0
	-45.78	0.173584	0	-0.20898	0	0.052	0	-0.06909	0
	-45.68	-0.245117	0	-0.01514	0	-0.23145	0	-0.15576	0
	-45.58	-0.576416	0	-0.51123	0	-0.33301	0	-0.4292	0
	-45.48	-0.0427246	0	0.00195	0	-0.21045	0	-0.18555	0
	-45.38	-0.115479	0	0.00732	0	0.062012	0	-0.10669	0
	-45.28	-0.0668945	0	-0.11353	0	0.115476	0	-0.19727	0
	-45.18	-0.0639648	0	-0.00586	0	-0.19629	0	0.00513	0
	-45.08	-0.340576	0	-0.04492	0	-0.00732	0	0.058106	0
	-44.98	-0.138916	0	-0.12769	0	0.0083	0	-0.23218	0
	-44.88	-0.0664063	0	0.151855	0	0.157471	0	0.084717	0
	-44.78	0.218018	0	0.024658	0	-0.05347	0	-0.11841	0
	-44.68	-0.0935059	0	-0.31128	0	-0.22827	0	0.016846	0
	-44.58	0.125244	0	0.191895	0	0.023193	0	0.103516	0
	-44.48	-0.0739746	0	-0.20264	0	-0.19629	0	-0.19092	0
	-44.38	-0.227295	0	-0.00586	0	-0.21216	0	-0.28857	0
	-44.28	-0.282715	0	-0.19336	0	-0.34716	0	-0.33252	0
	-44.18	-0.0834961	0	-0.20679	0	-0.2356	0	-0.1294	0
	-44.08	-0.0639648	0	-0.13257	0	-0.04492	0	-0.01758	0
	-43.98	0.0673828	0	0.094971	0	-0.25097	0	0.134766	0
	-43.88	0.212646	0	0.341064	0	-0.05566	0	0.462158	0
	-43.78	-0.00537	0	-0.27539	0	-0.15186	0	0.045654	0
	-43.68	0.0932617	0	-0.06592	0	-0.09155	0	-0.25659	0
	-43.58	-0.109375	0	-0.12231	0	-0.16065	0	-0.13794	0
	-43.48	0.0148926	0	0.163574	0	0.184804	0	0.176025	0
	-43.38	0.0541992	0	-0.33472	0	-0.31421	0	0.088867	0
	-43.28	-0.377197	0	-0.21143	0	-0.29883	0	-0.2644	0
	-43.18	-0.0473633	0	-0.17383	0	-0.30029	0	-0.21118	0
	-43.08	-0.067627	0	-0.26904	0	-0.1001	0	-0.0144	0
	-42.98	-0.131836	0	-0.24487	0	-0.10498	0	0.078613	0
	-42.88	-0.160645	0	-0.28857	0	-0.25342	0	-0.24097	0
	-42.78	0.247803	0	-0.02075	0	0.259025	0	0.164551	0
	-42.68	-0.0578613	0	-0.1145	0	-0.2356	0	-0.23804	0
	-42.58	0.032959	0	-0.1731	0	0.264404	0	0.291748	0
	-42.48	-0.388184	0	-0.16284	0	-0.26269	0	-0.32617	0
	-42.38	-0.0256348	0	0.066895	0	0.01294	0	-0.11523	0
	-42.28	-0.26001	0	-0.198	0	-0.15821	0	-0.06592	0
	-42.18	-0.295166	0	-0.20825	0	-0.30664	0	-0.08228	0
	-42.08	0.0297852	0	0.058106	0	0.247314	0	0.362793	0
	-41.98	-0.169434	0	0.045654	0	0.00513	0	-0.03394	0
	-41.88	-0.134277	0	-0.14404	0	-0.04321	0	0.11377	0
	-41.78	0.0222168	0	0.031738	0	-0.19165	0	0.022461	0
	-41.68	0.0307617	0	-0.22461	0	-0.17358	0	-0.17847	0
	-41.58	-0.180176	0	-0.37451	0	-0.16357	0	-0.15112	0
	-41.48	-0.277832	0	-0.33691	0	-0.05957	0	-0.00879	0
	-41.38	-0.135742	0	-0.34424	0	-0.30347	0	-0.03638	0
	-41.28	-0.289795	0	-0.20435	0	-0.26758	0	-0.34253	0
	-41.18	-0.126465	0	-0.31055	0	-0.02368	0	-0.12769	0
	-41.08	-0.389893	0	-0.41992	0	-0.41284	0	-0.26929	0
	-40.98	0.143066	0	0.094238	0	-0.0105	0	0.067627	0
	-40.88	-0.230469	0	0.150391	0	0.172363	0	0.090088	0
	-40.78	-0.0949707	0	-0.21899	0	0.040519	0	-0.12671	0
	-40.68	-0.446777	0	-0.19507	0	-0.49878	0	-0.44653	0
	-40.58	-0.199219	0	-0.18091	0	-0.27856	0	-0.24268	0
	-40.48	0.00806	0	-0.23999	0	-0.0564	0	0.031738	0
	-40.38	-0.12793	0	-0.28174	0	-0.11743	0	-0.05811	0
	-40.28	-0.000732	0	-0.25513	0	-0.01123	0	0.026856	0
	-40.18	0.00879	0	-0.20435	0	-0.29639	0	-0.03076	0
	-40.08	0.0322266	0	-0.19409	0	0.016846	0	-0.01904	0
	-39.98	0.0632324	0	0.023682	0	0.111317	0	0.366699	0
	-39.88	-0.111572	0	-0.04004	0	-0.14722	0	-0.20581	0
	-39.78	-0.292236	0	-0.28882	0	-0.22779	0	-0.09424	0
	-39.68	-0.438965	0	-0.29956	0	-0.29028	0	-0.27002	0
	-39.58	-0.208496	0	-0.10742	0	0.061279	0	-0.05518	0
	-39.48	-0.0185547	0	-0.09399	0	0.018551	0	-0.14868	0
	-39.38	-0.144287	0	0.05127	0	-0.16187	0	0.019287	0
	-39.28	-0.366943	0	-0.1106	0	-0.04248	0	-0.13867	0
	-39.18	0.0759277	0	0.180176	0	0.05127	0	-0.0957	0
	-39.08	0.182129	0	-0.31665	0	-0.09717	0	-0.03076	0
	-38.98	-0.00391	0	-0.14966	0	-0.01685	0	0.032471	0
	-38.88	-0.256104	0	-0.10034	0	0.027832	0	-0.03149	0
	-38.78	-0.074707	0	-0.0542	0	-0.21436	0	-0.07446	0
	-38.68	0.154053	0	-0.16748	0	-0.08618	0	-0.25342	0
	-38.58	-0.0671387	0	-0.06055	0	-0.04956	0	-0.14502	0
	-38.48	-0.270996	0	-0.36353	0	-0.46825	0	-0.23779	0
	-38.38	0.14624	0	0.00903	0	-0.18945	0	-0.08789	0
	-38.28	0.0969238	0	0.051025	0	-0.0481	0	0.067627	0
	-38.18	0.0656738	0	-0.02148	0	-0.05981	0	-0.03564	0
	-38.08	0.102539	0	0.364502	0	0.202881	0	0.267578	0
	-37.98	0.0415039	0	-0.08936	0	-0.26368	0	-0.0481	0
	-37.88	-0.365479	0	-0.35571	0	-0.20728	0	-0.36743	0
	-37.78	-0.151367	0	-0.24707	0	-0.30566	0	-0.40576	0
	-37.68	0.108887	0	0.206787	0	-0.12061	0	0.02002	0
	-37.58	-0.338867	0	-0.43555	0	-0.40649	0	-0.34717	0
	-37.48	-0.24292	0	-0.4043	0	-0.1621	0	0.118408	0
	-37.38	-0.278564	0	0.03418	0	0.031738	0	0.116943	0
	-37.28	-0.25293	0	-0.18091	0	-0.1565	0	0.087158	0
	-37.18	-0.316406	0	-0.12622	0	-0.052	0	-0.1582	0
	-37.08	0.0666504	0	-0.3252	0	-0.00342	0	-0.04468	0
	-36.98	-0.226318	0	-0.32227	0	0.066898	0	-0.03784	0
	-36.88	-0.135742	0	-0.08398	0	-0.01123	0	0.011475	0
	-36.78	-0.12793	0	-0.16577	0	-0.16821	0	-0.11035	0
	-36.68	0.226807	0	-0.15332	0	-0.01807	0	0.133301	0
	-36.58	-0.0866699	0	-0.17456	0	-0.31592	0	-0.04492	0
	-36.48	0.0612793	0	0.032471	0	-0.09228	0	-0.01978	0
	-36.38	0.196289	0	-0.10669	0	0.193359	0	0.074707	0
	-36.28	0.334473	0	0.158203	0	0.218504	0	0.35498	0
	-36.18	0.00854	0	-0.11914	0	0.013672	0	0.101074	0
	-36.08	0.0424805	0	0.010742	0	0.179443	0	0.208252	0
	-35.98	0.0571289	0	-0.01758	0	0.077152	0	0.08252	0
	-35.88	0.314209	0	0.444092	0	0.19873	0	0.394043	0
	-35.78	0.206299	0	0.289551	0	0.252915	0	0.151123	0
	-35.68	-0.147461	0	-0.23853	0	-0.25952	0	-0.32837	0
	-35.58	0.0517578	0	0.011475	0	-0.04712	0	0.204346	0
	-35.48	0.0627441	0	0.018311	0	-0.000252	0	-0.17529	0
	-35.38	0.0102539	0	-0.23169	0	-0.3418	0	-0.20361	0
	-35.28	0.155518	0	-0.04419	0	0.00976	0	0.115234	0
	-35.18	-0.0639648	0	-0.12622	0	0.092773	0	-0.04639	0
	-35.08	-0.0515137	0	-0.07153	0	0.046387	0	-0.05273	0
	-34.98	-0.0898438	0	-0.15039	0	-0.28564	0	-0.14648	0
	-34.88	0.0351563	0	-0.12061	0	0.233154	0	0.307373	0
	-34.78	-0.212158	0	-0.17603	0	-0.22681	0	0.040283	0
	-34.68	-0.0825195	0	-0.00732	0	-0.15796	0	-0.05737	0
	-34.58	-0.0866699	0	-0.03076	0	0.098145	0	0.032471	0
	-34.48	-0.109131	0	-0.15503	0	-0.13476	0	-0.073	0
	-34.38	-0.0083	0	-0.30884	0	-0.06738	0	-0.12769	0
	-34.28	-0.367188	0	0.026856	0	-0.12451	0	-0.00122	0
	-34.18	-0.3396	0	-0.21899	0	-0.13306	0	0.113037	0
	-34.08	-0.0473633	0	0.031006	0	-0.22925	0	0.180908	0
	-33.98	0.00244	0	-0.17627	0	-0.11744	0	-0.1106	0
	-33.88	-0.167969	0	-0.15967	0	0.0083	0	-0.34253	0
	-33.78	-0.0693359	0	-0.08325	0	-0.1316	0	-0.0105	0
	-33.68	-0.337158	0	-0.07446	0	-0.14307	0	-0.23462	0
	-33.58	-0.0390625	0	-0.24805	0	-0.13306	0	-0.07227	0
	-33.48	-0.445068	0	-0.37134	0	-0.05566	0	-0.33618	0
	-33.38	-0.285645	0	-0.17285	0	-0.10889	0	0.114502	0
	-33.28	-0.0637207	0	-0.29321	0	-0.12207	0	-0.04248	0
	-33.18	-0.113281	0	0.057373	0	0.032471	0	0.140869	0
	-33.08	-0.223145	0	-0.17773	0	-0.31909	0	-0.20801	0
	-32.98	-0.349121	0	-0.39478	0	0.094973	0	-0.17285	0
	-32.88	-0.245117	0	-0.31128	0	-0.23535	0	-0.01367	0
	-32.78	0.0500488	0	-0.01514	0	-0.28931	0	0.039551	0
	-32.68	-0.249023	0	-0.11499	0	-0.17993	0	0.136475	0
	-32.58	0.0541992	0	-0.04395	0	-0.32275	0	-0.17529	0
	-32.48	0.253174	0	-0.24243	0	0.065423	0	0.299561	0
	-32.38	-0.302246	0	-0.24878	0	-0.0769	0	-0.09888	0
	-32.28	-0.0561523	0	-0.03247	0	-0.20361	0	-0.05518	0
	-32.18	-0.0324707	0	0.012207	0	0.113037	0	0.0022	0
	-32.08	0.0424805	0	-0.00806	0	-0.02612	0	0.015381	0
	-31.98	-0.23877	0	-0.34644	0	0.029537	0	-0.22144	0
	-31.88	-0.216309	0	-0.21143	0	-0.21289	0	-0.45825	0
	-31.78	-0.151367	0	-0.28857	0	-0.1267	0	0.198242	0
	-31.68	0.0446777	0	-0.04639	0	0.026367	0	0.130127	0
	-31.58	-0.0529785	0	-0.3269	0	0.133301	0	0.178467	0
	-31.48	0.106445	0	-0.08862	0	-0.03466	0	-0.00952	0
	-31.38	0.185303	0	-0.00171	0	0.105225	0	0.32251	0
	-31.28	-0.269531	0	-0.31519	0	-0.39794	0	-0.22315	0
	-31.18	-0.0419922	0	-0.09155	0	-0.08154	0	0.131836	0
	-31.08	-0.341064	0	-0.19312	0	-0.21265	0	0.016846	0
	-30.98	-0.192139	0	-0.31982	0	-0.34643	0	-0.20264	0
	-30.88	-0.205322	0	-0.16821	0	-0.14087	0	0.05127	0
	-30.78	0.157227	0	0.130127	0	0.283194	0	0.247314	0
	-30.68	-0.149902	0	-0.24487	0	-0.26514	0	-0.00806	0
	-30.58	-0.384277	0	-0.15747	0	-0.14722	0	0.095703	0
	-30.48	0.0290527	0	-0.47144	0	-0.30883	0	-0.38159	0
	-30.38	-0.0895996	0	0.055176	0	-0.14648	0	-0.23389	0
	-30.28	-0.0671387	0	-0.25513	0	0.097168	0	-0.06128	0
	-30.18	0.130615	0	-0.1792	0	-0.10718	0	-0.2793	0
	-30.08	0.215088	0	-0.07129	0	0.184082	0	0.023926	0
	-29.98	0.246094	0	-0.01294	0	0.186267	0	0.146484	0
	-29.88	0.179932	0	-0.18164	0	-0.15576	0	0.00439	0
	-29.78	0.0478516	0	0.160645	0	-0.05982	0	0.108887	0
	-29.68	0.00415	0	-0.01587	0	-0.19312	0	-0.2019	0
	-29.58	-0.0803223	0	0.00513	0	-0.09399	0	-0.14722	0
	-29.48	0.341553	0	0.00269	0	0.18945	0	0.352783	0
	-29.38	0.0251465	0	-0.16846	0	-0.05029	0	0.105713	0
	-29.28	-0.0288086	0	-0.1355	0	-0.08155	0	0.097168	0
	-29.18	-0.165283	0	-0.2229	0	-0.36279	0	0.0061	0
	-29.08	-0.0437012	0	-0.18628	0	-0.08081	0	0.00977	0
	-28.98	-0.0529785	0	-0.36841	0	-0.07447	0	0.043457	0
	-28.88	-0.00928	0	-0.24097	0	-0.3855	0	-0.38477	0
	-28.78	-0.115479	0	-0.31592	0	-0.26342	0	-0.14478	0
	-28.68	-0.0788574	0	0.127686	0	0.226318	0	-0.02002	0
	-28.58	0.182861	0	-0.11377	0	0.195801	0	0.210449	0
	-28.48	-0.11084	0	-0.31372	0	0.306643	0	0.35498	0
	-28.38	0.172607	0	-0.09033	0	0.039551	0	0.193359	0
	-28.28	-0.198242	0	-0.19312	0	-0.26342	0	-0.20801	0
	-28.18	0.128174	0	-0.21362	0	0.031006	0	-0.073	0
	-28.08	-0.550537	0	-0.45508	0	-0.81201	0	-0.33154	0
	-27.98	-0.321777	0	-0.40649	0	-0.16894	0	-0.323	0
	-27.88	-0.320068	0	-0.28223	0	-0.42603	0	-0.10181	0
	-27.78	-0.0583496	0	-0.16748	0	-0.40502	0	0.023926	0
	-27.68	0.189209	0	0.174805	0	0.042725	0	0.231689	0
	-27.58	-0.0429688	0	-0.30518	0	-0.12695	0	-0.18945	0
	-27.48	-0.221924	0	0.033203	0	0.070797	0	-0.08252	0
	-27.38	-0.239014	0	-0.21436	0	-0.38623	0	-0.38159	0
	-27.28	-0.0998535	0	-0.16992	0	0.044187	0	0.121582	0
	-27.18	-0.130371	0	-0.08081	0	0.017822	0	-0.0918	0
	-27.08	-0.181885	0	-0.35278	0	-0.28931	0	-0.08618	0
	-26.98	-0.111572	0	-0.10034	0	0.075436	0	-0.09253	0
	-26.88	-0.0952148	0	-0.14258	0	-0.13623	0	0.202881	0
	-26.78	-0.045166	0	-0.2583	0	-0.32301	0	-0.073	0
	-26.68	-0.184082	0	-0.2207	0	-0.34399	0	-0.10034	0
	-26.58	0.294678	0	-0.10523	0	-0.02002	0	0.085449	0
	-26.48	0.0471191	0	0.098145	0	-0.21265	0	0.0083	0
	-26.38	-0.256104	0	-0.19482	0	-0.33057	0	-0.01343	0
	-26.28	-0.36084	0	-0.42383	0	-0.45263	0	-0.41821	0
	-26.18	-0.0224609	0	-0.14258	0	-0.09009	0	0.038574	0
	-26.08	-0.092041	0	-0.20044	0	-0.32837	0	0.177002	0
	-25.98	-0.370117	0	-0.35107	0	-0.25489	0	-0.05029	0
	-25.88	-0.408447	0	-0.40332	0	-0.37671	0	-0.47754	0
	-25.78	-0.483398	0	-0.54639	0	-0.58372	0	-0.68164	0
	-25.68	-0.206787	0	-0.22046	0	-0.08154	0	-0.09326	0
	-25.58	-0.0022	0	0.110596	0	0.165527	0	0.0271	0
	-25.48	-0.0568848	0	-0.06763	0	-0.05884	0	0.155762	0
	-25.38	-0.227295	0	-0.37622	0	-0.22388	0	0.033936	0
	-25.28	-0.288086	0	-0.3894	0	-0.35669	0	-0.26514	0
	-25.18	-0.0146484	0	-0.20581	0	-0.3457	0	0.080078	0
	-25.08	-0.223389	0	0.055908	0	-0.15039	0	-0.19653	0
	-24.98	-0.202881	0	-0.16602	0	-0.02295	0	-0.11206	0
	-24.88	-0.0419922	0	-0.12524	0	-0.25806	0	-0.15649	0
	-24.78	-0.154541	0	-0.16455	0	-0.02295	0	0.043213	0
	-24.68	0.0979004	0	-0.09497	0	-0.17456	0	-0.05884	0
	-24.58	0.0744629	0	0.024658	0	-0.05957	0	0.187988	0
	-24.48	-0.305176	0	-0.18701	0	-0.1228	0	0.080078	0
	-24.38	0.226563	0	-0.08252	0	-0.02539	0	0.26123	0
	-24.28	0.00781	0	-0.29736	0	-0.07373	0	-0.11304	0
	-24.18	-0.0615234	0	0.00977	0	-0.23145	0	0.30835	0
	-24.08	-0.207764	0	-0.21753	0	-0.35889	0	-0.03857	0
	-23.98	-0.172607	0	-0.0083	0	-0.13403	0	-0.05591	0
	-23.88	0.0666504	0	-0.24487	0	-0.33765	0	0.00293	0
	-23.78	-0.0483398	0	-0.15186	0	-0.18555	0	0.012207	0
	-23.68	-0.203857	0	-0.53857	0	-0.28931	0	-0.22998	0
	-23.58	-0.141113	0	-0.06128	0	-0.10254	0	0.070068	0
	-23.48	0.292236	0	-0.19653	0	0.01855	0	0.262207	0
	-23.38	0.141602	0	0.070068	0	-0.1543	0	0.240967	0
	-23.28	-0.0568848	0	-0.15649	0	-0.10107	0	0.053467	0
	-23.18	0.0930176	0	0.041016	0	-0.26831	0	0.269775	0
	-23.08	-0.302246	0	-0.14795	0	-0.49341	0	-0.05127	0
	-22.98	-0.205322	0	-0.2395	0	-0.17603	0	-0.04639	0
	-22.88	-0.459961	0	-0.37061	0	-0.17212	0	-0.06738	0
	-22.78	-0.324951	0	-0.08325	0	-0.14721	0	-0.25049	0
	-22.68	-0.0366211	0	-0.22363	0	-0.13159	0	-0.03613	0
	-22.58	-0.0395508	0	-0.18384	0	0.131104	0	0.168457	0
	-22.48	-0.441895	0	-0.16431	0	0.048343	0	-0.19946	0
	-22.38	0.0876465	0	-0.09082	0	-0.16821	0	0.021729	0
	-22.28	0.204102	0	-0.05273	0	0.120841	0	0.241211	0
	-22.18	-0.0185547	0	-0.02612	0	-0.51514	0	-0.09644	0
	-22.08	0.310303	0	0.124512	0	0.029297	0	0.158203	0
	-21.98	-0.0913086	0	0.125488	0	0.173826	0	0.015137	0
	-21.88	-0.0983887	0	0.152832	0	0.099609	0	0.033203	0
	-21.78	-0.0515137	0	-0.27222	0	0.022948	0	0.2854	0
	-21.68	0.00317	0	0.026856	0	-0.14648	0	0.150391	0
	-21.58	-0.385742	0	-0.11597	0	-0.43457	0	-0.24487	0
	-21.48	-0.149902	0	0.130127	0	-0.20898	0	-0.08008	0
	-21.38	0.312744	0	-0.00903	0	0.257568	0	0.094238	0
	-21.28	0.0751953	0	-0.11523	0	-0.17748	0	-0.01196	0
	-21.18	-0.0803223	0	-0.01123	0	0.070801	0	0.205078	0
	-21.08	0.0212402	0	-0.18701	0	-0.14331	0	0.118408	0
	-20.98	-0.140381	0	-0.24414	0	-0.31445	0	-0.24951	0
	-20.88	0.0844727	0	0.042725	0	-0.13232	0	0.017578	0
	-20.78	-0.0983887	0	-0.18555	0	0.03955	0	0.056641	0
	-20.68	-0.177979	0	0.030273	0	-0.06665	0	-0.08618	0
	-20.58	0.0883789	0	0.134033	0	0.318359	0	0.306641	0
	-20.48	0.369629	0	-0.1394	0	-0.08082	0	0.078369	0
	-20.38	0.148682	0	-0.19702	0	0.022461	0	-0.16748	0
	-20.28	0.143799	0	-0.10669	0	0.193353	0	-0.10107	0
	-20.18	-0.155273	0	-0.04346	0	-0.21997	0	-0.10034	0
	-20.08	-0.119385	0	-0.17383	0	-0.09326	0	-0.38794	0
	-19.98	-0.246826	0	-0.47852	0	-0.31836	0	-0.45898	0
	-19.88	-0.109863	0	-0.27295	0	-0.2439	0	-0.40723	0
	-19.78	-0.00391	0	-0.08936	0	0.062983	0	-0.13721	0
	-19.68	-0.0441895	0	-0.14478	0	0.00293	0	-0.03784	0
	-19.58	0.0183105	0	-0.03784	0	-0.30957	0	-0.06592	0
	-19.48	-0.276367	0	-0.05347	0	-0.25268	0	0.038818	0
	-19.38	-0.0700684	0	-0.24243	0	-0.08936	0	-0.01587	0
	-19.28	-0.0505371	0	-0.13452	0	0.144291	0	0.093506	0
	-19.18	-0.342773	0	0.125488	0	0.218506	0	0.305176	0
	-19.08	0.032959	0	0.015381	0	0.091065	0	-0.04004	0
	-18.98	-0.280273	0	-0.15723	0	-0.18213	0	-0.21582	0
	-18.88	-0.174805	0	-0.08545	0	-0.00171	0	-0.04175	0
	-18.78	-0.220215	0	-0.19263	0	-0.17774	0	0.130859	0
	-18.68	-0.0905762	0	-0.05347	0	0.126221	0	0.071533	0
	-18.58	-0.17627	0	0.070068	0	0.187988	0	-0.05957	0
	-18.48	0.189209	0	0.307617	0	0.10693	0	-0.04639	0
	-18.38	0.0734863	0	-0.06055	0	-0.19971	0	-0.16065	0
	-18.28	0.211914	0	-0.02368	0	0.033439	0	0.195068	0
	-18.18	-0.202393	0	-0.26294	0	-0.49951	0	-0.10913	0
	-18.08	0.461914	0	0.141113	0	0.00122	0	0.169922	0
	-17.98	0.00171	0	0.151367	0	-0.12451	0	-0.05103	0
	-17.88	-0.224121	0	0.00659	0	0.240234	0	0.105957	0
	-17.78	-0.150635	0	-0.36914	0	0.093259	0	0.097168	0
	-17.68	0.113525	0	0.020752	0	-0.13306	0	-0.04102	0
	-17.58	0.39917	0	0.246338	0	0.189453	0	0.400391	0
	-17.48	0.460205	0	0.227051	0	-0.01661	0	0.365967	0
	-17.38	0.236816	0	-0.0542	0	0.199707	0	0.326172	0
	-17.28	-0.276611	0	-0.19263	0	-0.23242	0	-0.25659	0
	-17.18	-0.313965	0	-0.30664	0	-0.31592	0	-0.30347	0
	-17.08	0.308838	0	0.260742	0	0.086426	0	-0.00488	0
	-16.98	0.143066	0	-0.11353	0	-0.12671	0	-0.23926	0
	-16.88	-0.102783	0	-0.14795	0	-0.18604	0	-0.12378	0
	-16.78	-0.027832	0	-0.29785	0	-0.1892	0	-0.36206	0
	-16.68	0.157959	0	-0.02612	0	0.119873	0	-0.10278	0
	-16.58	0.441406	0	0.158203	0	0.269287	0	0.114502	0
	-16.48	-0.013916	0	-0.15576	0	-0.01343	0	-0.09253	0
	-16.38	-0.0305176	0	0.076904	0	-0.00586	0	-0.14331	0
	-16.28	-0.0749512	0	-0.18408	0	-0.0481	0	-0.32617	0
	-16.18	-0.0668945	0	-0.38379	0	-0.17139	0	-0.30884	0
	-16.08	-0.0373535	0	-0.16138	0	0.015137	0	-0.3606	0
	-15.98	-0.238281	0	-0.3457	0	-0.26366	0	-0.31226	0
	-15.88	0.191406	0	0.099609	0	0.064453	0	0.156494	0
	-15.78	-0.108398	0	-0.18872	0	-0.39794	0	0.033203	0
	-15.68	-0.0700684	0	0.027832	0	-0.18701	0	0.172363	0
	-15.58	-0.349121	0	-0.21216	0	-0.29492	0	-0.05591	0
	-15.48	-0.133301	0	-0.14087	0	0.02247	0	-0.1814	0
	-15.38	-0.145996	0	0.027832	0	0.106689	0	0.053711	0
	-15.28	0.0625	0	0.074463	0	0.011222	0	0.357422	0
	-15.18	-0.209961	0	-0.20361	0	-0.01196	0	0.069824	0
	-15.08	-0.189697	0	-0.27783	0	0.044922	0	-0.09351	0
	-14.98	-0.227295	0	-0.21509	0	-0.09473	0	-0.27368	0
	-14.88	-0.13501	0	-0.28174	0	-0.10278	0	-0.21045	0
	-14.78	0.0493164	0	-0.19409	0	-0.26196	0	-0.1394	0
	-14.68	-0.176514	0	-0.07617	0	0.00342	0	0.168213	0
	-14.58	0.00879	0	0.033936	0	0.154297	0	0.185547	0
	-14.48	0.134521	0	0.07544	0	0.196767	0	0.148193	0
	-14.38	-0.164551	0	-0.2644	0	-0.03296	0	0.06543	0
	-14.28	0.331543	0	0.240479	0	-0.0127	0	0.062256	0
	-14.18	-0.249756	0	0.055176	0	-0.25732	0	-0.05957	0
	-14.08	-0.0817871	0	-0.17529	0	-0.02441	0	-0.09717	0
	-13.98	0.09375	0	-0.08252	0	0.294919	0	-0.19409	0
	-13.88	0.0703125	0	0.04419	0	0.292725	0	-0.31592	0
	-13.78	0.211182	0	0.037109	0	-0.07909	0	0.317627	0
	-13.68	0.1604	0	0.228516	0	0.369385	0	0.160645	0
	-13.58	0.123535	0	0.081787	0	0.249756	0	0.031006	0
	-13.48	0.0339355	0	-0.14941	0	0.099856	0	0.043457	0
	-13.38	0.207031	0	0.119141	0	0.011475	0	0.030762	0
	-13.28	0.240723	0	-0.00195	0	0.059814	0	0.155029	0
	-13.18	-0.0100098	0	-0.26685	0	0.08252	0	-0.02075	0
	-13.08	0.104004	0	-0.02539	0	-0.2605	0	0.142578	0
	-12.98	0.181396	0	0.246582	0	0.345207	0	0.136475	0
	-12.88	-0.0561523	0	-0.27856	0	0.108154	0	-0.06445	0
	-12.78	0.0939941	0	-0.02832	0	0.227776	0	0.070801	0
	-12.68	-0.0200195	0	0.042725	0	0.00684	0	-0.11206	0
	-12.58	0.0578613	0	-0.01196	0	-0.13159	0	0.070068	0
	-12.48	-0.0810547	0	0.013916	0	-0.08619	0	0.066162	0
	-12.38	-0.198975	0	-0.27759	0	-0.21191	0	-0.15576	0
	-12.28	0.00806	0	-0.09717	0	-0.27758	0	0.081787	0
	-12.18	0.079834	0	-0.17603	0	0.00122	0	0.03418	0
	-12.08	0.0744629	0	0.190186	0	-0.10815	0	0.00757	0
	-11.98	-0.125732	0	0.100342	0	-0.29956	0	0.026123	0
	-11.88	0.21875	0	0.00513	0	-0.0957	0	-0.00269	0
	-11.78	0.203857	0	-0.24731	0	-0.01685	0	0.00269	0
	-11.68	-0.304443	0	-0.31812	0	0.175537	0	0.030273	0
	-11.58	-0.0864258	0	-0.04248	0	-0.23462	0	-0.34399	0
	-11.48	0.0898438	0	0.130127	0	0.12085	0	0.101074	0
	-11.38	-0.0827637	0	-0.0105	0	0.00197	0	-0.17456	0
	-11.28	0.204834	0	0.173096	0	0.037354	0	0.253662	0
	-11.18	0.187744	0	0.237305	0	0.205322	0	0.263916	0
	-11.08	0.194824	0	0.015381	0	0.045166	0	0.219238	0
	-10.98	0.0202637	0	0.115234	0	0.077637	0	0.376221	0
	-10.88	-0.0241699	0	0.281494	0	0.168456	0	0.176025	0
	-10.78	-0.0671387	0	0.072998	0	0.145752	0	-0.17456	0
	-10.68	0.28833	0	-0.00659	0	0.083252	0	0.159668	0
	-10.58	-0.209961	0	0.118408	0	-0.14966	0	0.026123	0
	-10.48	-0.076416	0	0.1521	0	0.098145	0	0.138672	0
	-10.38	-0.326416	0	0.027832	0	-0.38231	0	-0.07227	0
	-10.28	-0.0022	0	0.126953	0	-0.12769	0	0.010498	0
	-10.18	-0.148193	0	0.030273	0	-0.17529	0	-0.08765	0
	-10.08	0.0241699	0	0.119141	0	-0.24878	0	0.082275	0
	-9.98	-0.013916	0	0.038574	0	-0.30737	0	0.101074	0
	-9.88	0.433105	0	0.15918	0	0.062982	0	0.234863	0
	-9.78	0.0524902	0	0.092773	0	0.17334	0	0.303711	0
	-9.68	0.0649414	0	0.084717	0	0.261475	0	0.190918	0
	-9.58	0.22998	0	0.07544	0	0.077148	0	0.406738	0
	-9.48	-0.0185547	0	-0.04712	0	-0.04395	0	0.022461	0
	-9.38	0.13208	0	0.128662	0	0.2959	0	0.083984	0
	-9.28	-0.0256348	0	0.07544	0	0.232422	0	0.032471	0
	-9.18	-0.0256348	0	0.131592	0	0.130127	0	0.256592	0
	-9.08	0.165771	0	-0.06128	0	0.00366	0	0.044922	0
	-8.98	-0.0405273	0	-0.14795	0	-0.3418	0	-0.16992	0
	-8.88	-0.0793457	0	-0.20483	0	0.097414	0	-0.18237	0
	-8.78	-0.0966797	0	-0.10571	0	0.283447	0	-0.073	0
	-8.68	-0.148193	0	-0.4043	0	-0.31128	0	-0.14404	0
	-8.58	0.146973	0	-0.17554	0	0.091065	0	0.00415	0
	-8.48	-0.0656738	0	-0.01221	0	0.024658	0	0.155029	0
	-8.38	0.124512	0	0.00293	0	0.057612	0	-0.11035	0
	-8.28	0.064209	0	-0.08325	0	-0.05981	0	0.011231	0
	-8.18	0.00806	0	0.00293	0	-0.4126	0	-0.08691	0
	-8.08	-0.0686035	0	-0.0918	0	0.307617	0	-0.03613	0
	-7.98	0.0837402	0	0.116943	0	0.056152	0	0.174805	0
	-7.88	-0.00537	0	0.283936	0	-0.14015	0	0.149658	0
	-7.78	-0.303711	0	0.05127	0	-0.41577	0	-0.18628	0
	-7.68	-0.10376	0	0.107422	0	-0.13159	0	-0.07446	0
	-7.58	0.0844727	0	0.069824	0	0.10498	0	-0.16919	0
	-7.48	0.0407715	0	-0.21606	0	-0.1604	0	-0.20435	0
	-7.38	-0.311523	0	0.098877	0	0.04494	0	-0.2395	0
	-7.28	-0.0671387	0	0.201904	0	0.397949	0	-0.04883	0
	-7.18	-0.385742	0	-0.03711	0	-0.29321	0	-0.12915	0
	-7.08	-0.160156	0	-0.14185	0	-0.06665	0	-0.08789	0
	-6.98	0.212646	0	0.130127	0	0.091309	0	-0.12134	0
	-6.88	-0.0583496	0	0.059082	0	0.028569	0	-0.40332	0
	-6.78	-0.240479	0	0.269043	0	0.059082	0	-0.23877	0
	-6.68	-0.102295	0	-0.10107	0	-0.03613	0	-0.14868	0
	-6.58	-0.452148	0	-0.24243	0	-0.13623	0	-0.39722	0
	-6.48	-0.214844	0	-0.06299	0	0.081543	0	0.182373	0
	-6.38	-0.0578613	0	-0.16455	0	-0.13719	0	-0.29883	0
	-6.28	0.24707	0	0.0271	0	0.174072	0	0.017822	0
	-6.18	-0.16626	0	-0.16187	0	-0.14697	0	-0.14722	0
	-6.08	-0.0349121	0	-0.10742	0	-0.0105	0	-0.08789	0
	-5.98	-0.142822	0	-0.05884	0	0.063965	0	0.146729	0
	-5.88	0.146973	0	-0.15259	0	-0.14405	0	0.080078	0
	-5.78	0.0205078	0	-0.01221	0	-0.19263	0	-0.29419	0
	-5.68	0.125244	0	0.090332	0	-0.07666	0	-0.07373	0
	-5.58	-0.153564	0	0.202148	0	0.081787	0	0.188721	0
	-5.48	-0.0131836	0	-0.12305	0	0.11377	0	-0.21826	0
	-5.38	-0.0334473	0	0.052002	0	0.014643	0	-0.06982	0
	-5.28	-0.000732	0	0.153564	0	-0.01196	0	-0.07837	0
	-5.18	-0.0170898	0	0.090332	0	0.248047	0	0.138672	0
	-5.08	0.20166	0	0.262939	0	0.213867	0	0.094238	0
	-4.98	0.159668	0	-0.03076	0	-0.30103	0	0.141846	0
	-4.88	0.32666	0	0.14502	0	0.103761	0	-0.12061	0
	-4.78	0.205566	0	0.170898	0	-0.11743	0	-0.11597	0
	-4.68	0.24707	0	0.333984	0	0.083252	0	0.241943	0
	-4.58	-0.263184	0	-0.14331	0	-0.43164	0	-0.04102	0
	-4.48	0.182129	0	0.252686	0	-0.00659	0	0.070801	0
	-4.38	0.23291	0	0.231689	0	0.189671	0	0.206055	0
	-4.28	-0.09375	0	-0.06299	0	-0.08081	0	-0.19409	0
	-4.18	0.178223	0	0.053467	0	0.235596	0	0.186279	0
	-4.08	0.110352	0	-0.16602	0	0.126953	0	-0.09888	0
	-3.98	-0.20459	0	-0.47607	0	0.106689	0	-0.18774	0
	-3.88	-0.10376	0	-0.12915	0	-0.03392	0	-0.10034	0
	-3.78	0.197021	0	0.111328	0	0.246582	0	0.03418	0
	-3.68	0.0268555	0	-0.04565	0	-0.35254	0	0.0271	0
	-3.58	-0.257813	0	-0.23706	0	-0.18237	0	-0.01904	0
	-3.48	0.214844	0	0.359619	0	0.444824	0	0.279297	0
	-3.38	0.136963	0	0.17627	0	0.265369	0	0.187988	0
	-3.28	0.0979004	0	-0.07446	0	-0.05884	0	-0.0918	0
	-3.18	0.24292	0	0.192627	0	0.344971	0	0.300293	0
	-3.08	-0.217773	0	0.080078	0	-0.0752	0	-0.28711	0
	-2.98	-0.141357	0	-0.0918	0	-0.21216	0	-0.0105	0
	-2.88	0.00781	0	-0.02222	0	-0.00735	0	0.00659	0
	-2.78	-0.278564	0	-0.14551	0	-0.00879	0	-0.45801	0
	-2.68	-0.0153809	0	-0.07129	0	-0.11816	0	0.286377	0
	-2.58	-0.0952148	0	0.02002	0	0.106689	0	-0.13477	0
	-2.48	-0.146729	0	-0.20508	0	-0.11743	0	-0.22998	0
	-2.38	0.197021	0	0.177979	0	0.063962	0	-0.09399	0
	-2.28	0.0610352	0	0.041748	0	0.028565	0	-0.06689	0
	-2.18	-0.0356445	0	0.263916	0	0.068604	0	-0.06128	0
	-2.08	-0.278076	0	0.205078	0	-0.09961	0	-0.19092	0
	-1.98	-0.0170898	0	0.180908	0	0.052734	0	0.154297	0
	-1.88	-0.141846	0	-0.13232	0	0.183357	0	-0.09863	0
	-1.78	-0.225586	0	-0.08081	0	0.09668	0	0.00684	0
	-1.68	-0.0974121	0	0.175537	0	0.188721	0	0.0271	0
	-1.58	0.0744629	0	0.140381	0	0.034912	0	0.344971	0
	-1.48	-0.0639648	0	0.419189	0	-0.05029	0	0.115234	0
	-1.38	0.125977	0	0.229248	0	-0.06739	0	0.026123	0
	-1.28	-0.269287	0	0.167725	0	0.083252	0	-0.04883	0
	-1.18	-0.139648	0	-0.00342	0	-0.18457	0	-0.01123	0
	-1.08	0.0805664	0	0.052734	0	-0.1189	0	-0.0769	0
	-0.98	-0.0842285	0	0.00366	0	-0.19238	0	-0.11206	0
	-0.88001	0.0603027	0	0.049561	0	-0.19165	0	-0.03638	0
	-0.78	-0.0927734	0	0.354248	0	0.254395	0	0.210693	0
	-0.68	0.173584	0	0.454346	0	0.126465	0	0.180176	0
	-0.58	-0.188965	0	-0.24414	0	-0.29395	0	-0.13159	0
	-0.48	-0.0585938	0	0.373047	0	0.373047	0	0.071533	0
	-0.38001	0.267334	0	-0.06982	0	-0.03295	0	0.243408	0
	-0.28	0.183838	0	0.00659	0	-0.03467	0	0.168457	0
	-0.18	0.887695	0	0.661377	0	0.505859	0	0.098877	0
	-0.08	-1.13965	0	-0.79956	0	-1.67456	0	-0.0481	0
	0.019997	1.75488	-0.1418	-0.60107	0.464	-2.37671	0.9754	-4.89868	2.191
	0.119995	2.42749	-0.14116	0.397217	0.465279	0.072085	0.977959	-5.83179	2.19612
	0.220001	-0.0380859	-0.14052	0.112305	0.466559	-0.32129	0.980517	-1.66992	2.20123
	0.32	-0.969482	-0.13988	-0.7605	0.467838	-0.78174	0.983074	0.030029	2.20634
	0.419998	-0.485107	-0.13924	-0.03174	0.469117	-0.14722	0.98563	0.354248	2.21144
	0.519997	0.870361	-0.1386	0.852051	0.470395	0.648926	0.988184	0.974609	2.21655
	0.619995	0.775146	-0.13796	0.941162	0.471674	0.756794	0.990739	0.682373	2.22164
	0.720001	0.503174	-0.13732	0.769775	0.472952	0.647217	0.993292	0.768311	2.22674
	0.82	0.630615	-0.13668	0.773193	0.47423	0.814697	0.995844	1.14185	2.23183
	0.919998	0.3125	-0.13604	0.415283	0.475507	0.389404	0.998395	0.898926	2.23691
	1.02	0.859375	-0.13541	1.05664	0.476784	0.876953	1.00095	1.31763	2.242
	1.12	0.355469	-0.13477	0.534668	0.478062	0.648923	1.00349	1.16748	2.24707
	1.22	0.206299	-0.13413	0.420654	0.479339	0.298828	1.00604	1.08252	2.25215
	1.32	0.775146	-0.13349	0.889404	0.480615	0.938721	1.00859	1.71143	2.25722
	1.42	0.333008	-0.13285	0.602783	0.481892	0.583252	1.01114	0.969238	2.26229
	1.52	0.525146	-0.13221	0.666016	0.483168	0.698975	1.01368	1.43555	2.26735
	1.62	0.456299	-0.13157	0.679199	0.484444	0.485591	1.01623	1.14868	2.27241
	1.72	0.0820313	-0.13093	0.413574	0.48572	0.436279	1.01877	0.995605	2.27747
	1.82	0.287598	-0.13029	0.32373	0.486995	0.58252	1.02131	1.20435	2.28252
	1.92	0.333008	-0.12965	0.62793	0.48827	0.432617	1.02385	0.962891	2.28757
	2.02	0.46582	-0.12902	0.834717	0.489545	0.442627	1.0264	1.30127	2.29261
	2.12	0.601563	-0.12838	0.584717	0.49082	0.594975	1.02894	1.37622	2.29766
	2.22	0.343018	-0.12774	0.651123	0.492095	0.848877	1.03147	1.53247	2.30269
	2.32	0.258789	-0.1271	0.555176	0.493369	0.626953	1.03401	1.26758	2.30773
	2.42	0.304688	-0.12646	0.524658	0.494643	0.526855	1.03655	1.39575	2.31276
	2.52	0.10083	-0.12582	0.55127	0.495917	0.389648	1.03909	1.29883	2.31778
	2.62	0.0283203	-0.12519	0.467529	0.49719	0.296633	1.04162	1.37549	2.3228
	2.72	-0.11792	-0.12455	0.482422	0.498464	0.449707	1.04416	1.08545	2.32782
	2.82	0.251709	-0.12391	0.715332	0.499737	0.848145	1.04669	1.68945	2.33284
	2.92	0.279053	-0.12327	0.515381	0.50101	0.442871	1.04922	1.4231	2.33785
	3.02	0.127441	-0.12263	0.639404	0.502282	0.338623	1.05175	1.42847	2.34286
	3.12	-0.0192871	-0.12199	0.523926	0.503555	0.540279	1.05428	1.46924	2.34786
	3.22	0.307129	-0.12136	0.570801	0.504827	0.425537	1.05681	1.34888	2.35286
	3.32	0.10498	-0.12072	0.330322	0.506099	0.33252	1.05934	1.12622	2.35786
	3.42	0.319824	-0.12008	0.490479	0.507371	0.670898	1.06187	1.34033	2.36285
	3.52	0.227539	-0.11944	0.309082	0.508642	0.772461	1.06439	1.38574	2.36784
	3.62	0.476074	-0.11881	0.60376	0.509913	0.730958	1.06692	1.43579	2.37283
	3.72	0.144043	-0.11817	0.669189	0.511184	0.851318	1.06945	1.52393	2.37781
	3.82	0.254883	-0.11753	0.241211	0.512455	0.570801	1.07197	1.54272	2.38278
	3.92	0.24707	-0.11689	0.552734	0.513725	0.641846	1.07449	1.46143	2.38776
	4.02	0.214355	-0.11626	0.517822	0.514996	0.566162	1.07701	1.55298	2.39273
	4.12	-0.0022	-0.11562	0.50293	0.516266	0.278581	1.07954	1.34277	2.3977
	4.22	0.161133	-0.11498	0.400391	0.517536	0.735596	1.08206	1.82373	2.40266
	4.32	0.0656738	-0.11434	0.423096	0.518805	0.722412	1.08457	1.7356	2.40762
	4.42	-0.0163574	-0.11371	0.309814	0.520075	0.678711	1.08709	1.18555	2.41257
	4.52	0.0837402	-0.11307	0.474609	0.521344	0.663574	1.08961	1.38159	2.41753
	4.62	0.0354004	-0.11243	0.466064	0.522612	0.581773	1.09213	1.51074	2.42247
	4.72	-0.152832	-0.11179	0.016846	0.523881	0.225586	1.09464	1.44971	2.42742
	4.82	0.19458	-0.11116	0.391846	0.52515	0.77002	1.09716	1.698	2.43236
	4.92	0.00317	-0.11052	0.366699	0.526418	0.688721	1.09967	1.53931	2.4373
	5.02	0.0219727	-0.10988	0.322998	0.527686	0.583252	1.10218	1.41992	2.44223
	5.12	-0.0732422	-0.10925	0.55127	0.528953	0.937998	1.10469	1.75586	2.44716
	5.22	0.102539	-0.10861	0.675537	0.530221	0.577881	1.10721	1.74487	2.45209
	5.32	0.291504	-0.10797	0.406738	0.531488	0.797363	1.10971	1.71606	2.45701
	5.42	-0.0419922	-0.10734	0.405273	0.532755	0.886475	1.11222	1.53101	2.46193
	5.52	-0.0778809	-0.1067	0.30835	0.534022	0.355957	1.11473	1.54883	2.46685
	5.62	-0.181885	-0.10606	0.388672	0.535288	0.37548	1.11724	1.54639	2.47176
	5.72	-0.0622559	-0.10543	0.073975	0.536555	0.550537	1.11974	1.19897	2.47667
	5.82	-0.114502	-0.10479	0.515381	0.537821	0.238037	1.12225	1.5459	2.48157
	5.92	0.283691	-0.10415	0.358154	0.539086	0.604492	1.12475	1.96606	2.48647
	6.02	0.0524902	-0.10352	0.466797	0.540352	0.842041	1.12726	1.66138	2.49137
	6.12	0.286133	-0.10288	0.593506	0.541617	0.663076	1.12976	2.0498	2.49626
	6.22	0.32373	-0.10225	0.516113	0.542882	0.553711	1.13226	1.76294	2.50115
	6.32	0.467285	-0.10161	0.615234	0.544147	1.04736	1.13476	2.21216	2.50604
	6.42	0.122803	-0.10097	0.549805	0.545412	0.651367	1.13726	1.9209	2.51092
	6.52	0.222656	-0.10034	0.496582	0.546676	0.566895	1.13976	1.83154	2.5158
	6.62	-0.131104	-0.0997	0.170654	0.54794	0.492673	1.14226	1.80518	2.52068
	6.72	-0.255371	-0.09907	0.30835	0.549204	0.514648	1.14476	1.84888	2.52555
	6.82	-0.190674	-0.09843	0.416748	0.550468	0.479248	1.14725	1.86743	2.53042
	6.92	0.0830078	-0.09779	0.592529	0.551731	0.788818	1.14975	1.69482	2.53528
	7.02	0.226074	-0.09716	0.533447	0.552995	0.906006	1.15224	1.88965	2.54014
	7.12	-0.306885	-0.09652	0.245117	0.554258	0.570055	1.15473	1.83179	2.545
	7.22	-0.0395508	-0.09589	0.305176	0.55552	0.298096	1.15723	1.43408	2.54985
	7.32	-0.177246	-0.09525	0.209717	0.556783	0.489502	1.15972	1.67773	2.5547
	7.42	0.0932617	-0.09462	0.066162	0.558045	0.552979	1.16221	1.80371	2.55955
	7.52	-0.139648	-0.09398	0.22998	0.559307	0.273926	1.1647	1.79419	2.56439
	7.62	-0.0715332	-0.09335	0.326416	0.560569	0.45995	1.16718	1.81372	2.56923
	7.72	-0.258545	-0.09271	0.293213	0.561831	0.779297	1.16967	1.86279	2.57407
	7.82	0.20874	-0.09207	0.392578	0.563092	0.633301	1.17216	1.95508	2.5789
	7.92	0.211914	-0.09144	0.700439	0.564353	0.586426	1.17464	2.1084	2.58373
	8.02	0.0742188	-0.0908	0.269775	0.565614	0.674561	1.17713	2.13232	2.58855
	8.12	0.127441	-0.09017	0.281006	0.566875	0.489509	1.17961	1.90283	2.59337
	8.22	0.078125	-0.08953	0.555908	0.568135	0.693359	1.1821	2.11914	2.59819
	8.32	0.117432	-0.0889	0.673096	0.569395	0.920898	1.18458	2.13721	2.60301
	8.42	0.102539	-0.08826	0.596436	0.570655	0.743408	1.18706	2.1333	2.60782
	8.52	-0.0600586	-0.08763	0.578613	0.571915	0.510498	1.18954	2.06982	2.61262
	8.62	-0.00537	-0.08699	0.767578	0.573174	0.704339	1.19202	2.15283	2.61743
	8.72	-0.143555	-0.08636	0.306885	0.574434	0.509277	1.1945	1.97168	2.62223
	8.82	0.155518	-0.08573	0.531738	0.575693	0.942627	1.19697	1.95752	2.62702
	8.92	-0.328125	-0.08509	0.414551	0.576951	0.660645	1.19945	1.79419	2.63182
	9.02	0.0720215	-0.08446	0.731689	0.57821	0.7771	1.20193	2.05298	2.63661
	9.12	0.0744629	-0.08382	0.398926	0.579468	0.873032	1.2044	2.2207	2.64139
	9.22	-0.122314	-0.08319	0.259033	0.580726	0.570068	1.20688	2.13013	2.64617
	9.32	-0.186523	-0.08255	0.427734	0.581984	0.310547	1.20935	1.9707	2.65095
	9.42	-0.0344238	-0.08192	0.299561	0.583242	0.762207	1.21182	2.19727	2.65573
	9.52	-0.0109863	-0.08128	0.378418	0.584499	0.552734	1.21429	1.95508	2.6605
	9.62	0.0212402	-0.08065	0.322266	0.585756	0.59642	1.21676	2.14648	2.66527
	9.72	-0.176514	-0.08002	0.192627	0.587013	0.589355	1.21923	1.7168	2.67003
	9.82	-0.226563	-0.07938	0.367676	0.58827	0.766113	1.2217	1.96826	2.67479
	9.92	-0.0935059	-0.07875	0.292725	0.589526	0.733398	1.22417	2.1333	2.67955
	10.02	-0.195068	-0.07811	0.591064	0.590782	0.626221	1.22663	2.07153	2.6843
	10.12	0.224365	-0.07748	0.430176	0.592038	0.884754	1.2291	2.20508	2.68905
	10.22	0.252441	-0.07685	0.555176	0.593294	0.868408	1.23156	2.04419	2.6938
	10.32	0.0180664	-0.07621	0.746582	0.59455	1.06226	1.23403	2.37793	2.69854
	10.42	0.0688477	-0.07558	0.514404	0.595805	0.878662	1.23649	2.33789	2.70328
	10.52	-0.141357	-0.07495	0.475342	0.59706	0.798096	1.23895	2.42065	2.70802
	10.62	0.114258	-0.07431	0.442627	0.598315	0.823977	1.24141	2.32642	2.71275
	10.72	-0.123291	-0.07368	0.394287	0.599569	0.788086	1.24387	2.49585	2.71748
	10.82	0.249268	-0.07305	0.408936	0.600824	0.820801	1.24633	2.41992	2.72221
	10.92	0.209473	-0.07241	0.584717	0.602078	0.661377	1.24879	2.32935	2.72693
	11.02	-0.116943	-0.07178	0.480957	0.603332	0.903809	1.25125	2.53882	2.73165
	11.12	0.380615	-0.07115	0.849609	0.604585	1.28026	1.2537	2.56226	2.73636
	11.22	0.372803	-0.07051	0.528564	0.605839	1.08105	1.25616	2.40283	2.74107
	11.32	0.0773926	-0.06988	0.585449	0.607092	0.715332	1.25861	2.09253	2.74578
	11.42	0.215088	-0.06925	0.281738	0.608345	0.773193	1.26107	2.22705	2.75049
	11.52	0.00562	-0.06861	0.526123	0.609598	0.862793	1.26352	2.48242	2.75519
	11.62	0.0627441	-0.06798	0.663086	0.61085	0.823253	1.26597	2.31616	2.75989
	11.72	0.213623	-0.06735	0.69751	0.612102	1.05225	1.26842	2.79419	2.76458
	11.82	0.224365	-0.06671	0.802734	0.613354	1.19897	1.27087	2.7583	2.76927
	11.92	-0.0373535	-0.06608	0.290283	0.614606	0.7771	1.27332	2.18091	2.77396
	12.02	0.16333	-0.06545	0.437256	0.615858	0.793457	1.27577	2.3606	2.77864
	12.12	0.0212402	-0.06482	0.562744	0.617109	0.966791	1.27822	2.198	2.78332
	12.22	0.019043	-0.06418	0.191895	0.61836	0.849121	1.28066	2.29517	2.788
	12.32	0.38623	-0.06355	0.888672	0.619611	0.982666	1.28311	2.35278	2.79267
	12.42	0.0705566	-0.06292	0.505127	0.620862	1.22876	1.28555	2.36768	2.79734
	12.52	0.0900879	-0.06229	0.656738	0.622112	0.769287	1.288	2.30981	2.80201
	12.62	0.182373	-0.06165	0.747314	0.623362	1.07642	1.29044	2.48022	2.80667
	12.72	0.16748	-0.06102	0.540283	0.624612	0.94043	1.29288	2.56226	2.81133
	12.82	0.226074	-0.06039	0.652832	0.625862	1.18335	1.29532	2.72241	2.81599
	12.92	-0.0490723	-0.05976	0.429199	0.627111	0.659668	1.29776	2.42529	2.82064
	13.02	0.119629	-0.05912	0.595703	0.62836	1.06592	1.3002	2.64014	2.82529
	13.12	0.143311	-0.05849	0.243408	0.629609	0.872573	1.30264	2.30762	2.82993
	13.22	0.15332	-0.05786	0.553711	0.630858	1.04053	1.30508	2.71069	2.83458
	13.32	0.341553	-0.05723	0.762939	0.632107	1.26538	1.30751	2.74512	2.83921
	13.42	0.322754	-0.0566	0.708252	0.633355	1.17236	1.30995	2.64575	2.84385
	13.52	-0.12793	-0.05596	0.490967	0.634603	0.875488	1.31238	2.34888	2.84848
	13.62	0.0368652	-0.05533	0.656006	0.635851	0.978029	1.31482	2.34277	2.85311
	13.72	0.0180664	-0.0547	0.553467	0.637098	0.937988	1.31725	2.57153	2.85773
	13.82	0.173584	-0.05407	0.591797	0.638346	1.18018	1.31968	2.94165	2.86236
	13.92	0.175781	-0.05344	0.591064	0.639593	1.04346	1.32211	2.57544	2.86697
	14.02	-0.391357	-0.05281	0.484863	0.64084	0.739502	1.32454	2.49976	2.87159
	14.12	0.176025	-0.05217	0.821533	0.642086	1.23729	1.32697	2.6333	2.8762
	14.22	-0.159424	-0.05154	0.335449	0.643333	0.780029	1.3294	2.4917	2.88081
	14.32	0.0695801	-0.05091	0.487061	0.644579	1.14648	1.33183	2.91382	2.88541
	14.42	-0.0280762	-0.05028	0.697998	0.645825	1.03174	1.33425	2.54248	2.89001
	14.52	-0.237549	-0.04965	0.433105	0.647071	0.743408	1.33668	2.38794	2.89461
	14.62	-0.172607	-0.04902	0.404297	0.648316	0.820793	1.3391	2.69971	2.8992
	14.72	-0.124023	-0.04839	0.496582	0.649562	0.868408	1.34153	2.19019	2.9038
	14.82	-0.078125	-0.04775	0.344971	0.650807	0.747314	1.34395	2.10742	2.90838
	14.92	-0.139648	-0.04712	0.249512	0.652052	0.915283	1.34637	2.35669	2.91297
	15.02	-0.139648	-0.04649	0.747314	0.653296	1.04834	1.34879	2.61304	2.91755
	15.12	0.0603027	-0.04586	0.840332	0.65454	1.09498	1.35121	2.53174	2.92212
	15.22	0.324463	-0.04523	0.885742	0.655785	1.30908	1.35363	3.11938	2.9267
	15.32	0.118896	-0.0446	0.595947	0.657029	1.021	1.35605	2.55127	2.93127
	15.42	0.398682	-0.04397	0.981689	0.658272	1.52466	1.35847	3.12476	2.93584
	15.52	0.235352	-0.04334	0.674805	0.659516	1.30688	1.36088	2.91455	2.9404
	15.62	0.0205078	-0.04271	0.573975	0.660759	1.06689	1.3633	2.57617	2.94496
	15.72	-0.0522461	-0.04208	0.572998	0.662002	0.668457	1.36571	2.77539	2.94952
	15.82	0.332275	-0.04145	0.949707	0.663245	1.44897	1.36813	3.14038	2.95407
	15.92	-0.0576172	-0.04082	0.262939	0.664487	1.01465	1.37054	2.66699	2.95862
	16.02	0.322021	-0.04019	0.642578	0.665729	1.35913	1.37295	2.82617	2.96317
	16.12	-0.347412	-0.03956	0.105957	0.666971	0.874763	1.37536	2.44043	2.96771
	16.22	-0.296143	-0.03893	0.431641	0.668213	0.859863	1.37777	2.56592	2.97225
	16.32	0.133789	-0.0383	0.573242	0.669455	1.09033	1.38018	2.61621	2.97678
	16.42	0.0627441	-0.03766	0.842773	0.670696	1.30054	1.38259	2.82935	2.98132
	16.52	-0.199707	-0.03703	0.741943	0.671937	1.25513	1.385	2.86841	2.98585
	16.62	0.0947266	-0.0364	0.937988	0.673178	1.53734	1.38741	2.89575	2.99037
	16.72	-0.109863	-0.03577	0.577881	0.674419	1.16943	1.38981	2.57007	2.9949
	16.82	-0.09375	-0.03514	0.463623	0.675659	1.06616	1.39222	2.66602	2.99942
	16.92	0.0705566	-0.03451	0.775391	0.6769	1.30908	1.39462	2.75977	3.00393
	17.02	0.273438	-0.03389	0.802002	0.67814	1.21924	1.39702	2.69263	3.00845
	17.12	-0.0163574	-0.03326	0.740967	0.679379	1.28248	1.39943	2.58862	3.01296
	17.22	0.0463867	-0.03263	0.608398	0.680619	1.47241	1.40183	3.03882	3.01746
	17.32	-0.0324707	-0.032	0.679443	0.681858	1.13037	1.40423	2.77637	3.02196
	17.42	-0.189697	-0.03137	0.516846	0.683097	1.12939	1.40663	2.79028	3.02646
	17.52	-0.0622559	-0.03074	0.783203	0.684336	1.07007	1.40903	2.79199	3.03096
	17.62	0.0893555	-0.03011	0.797363	0.685575	1.00147	1.41142	2.82324	3.03545
	17.72	0.204834	-0.02948	0.626953	0.686813	1.52856	1.41382	2.7356	3.03994
	17.82	-0.218018	-0.02885	0.451172	0.688051	1.23877	1.41622	2.73853	3.04443
	17.92	-0.213135	-0.02822	0.786377	0.689289	1.10034	1.41861	2.75415	3.04891
	18.02	0.124512	-0.02759	0.888916	0.690527	1.23486	1.42101	2.80762	3.05339
	18.12	-0.0380859	-0.02696	0.513916	0.691764	0.854488	1.4234	2.84497	3.05787
	18.22	0.0456543	-0.02633	0.573242	0.693001	1.16553	1.42579	2.44043	3.06234
	18.32	-0.00781	-0.0257	0.820557	0.694238	1.30273	1.42818	2.77539	3.06681
	18.42	0.0212402	-0.02507	0.597412	0.695475	1.16528	1.43057	2.85986	3.07128
	18.52	0.0517578	-0.02444	0.616943	0.696712	1.00537	1.43296	2.552	3.07574
	18.62	-0.283447	-0.02382	0.520752	0.697948	1.01049	1.43535	2.70654	3.0802
	18.72	-0.30127	-0.02319	0.340332	0.699184	0.955322	1.43774	2.5647	3.08465
	18.82	-0.0178223	-0.02256	1.0144	0.70042	1.34106	1.44013	2.9292	3.08911
	18.92	0.140625	-0.02193	0.560547	0.701655	1.00439	1.44251	2.99658	3.09356
	19.02	-0.0458984	-0.0213	0.634033	0.702891	0.977051	1.4449	2.68408	3.098
	19.12	-0.105225	-0.02067	0.624023	0.704126	0.9966	1.44728	2.66455	3.10245
	19.22	0.11499	-0.02004	0.7771	0.705361	1.30371	1.44967	2.87402	3.10689
	19.32	0.279053	-0.01942	1.1145	0.706596	1.30737	1.45205	3.16675	3.11132
	19.42	0.017334	-0.01879	0.649658	0.70783	1.26855	1.45443	2.78784	3.11576
	19.52	-0.20459	-0.01816	0.538818	0.709064	0.688721	1.45681	2.79199	3.12019
	19.62	-0.303711	-0.01753	0.554443	0.710298	0.928718	1.45919	2.74194	3.12461
	19.72	-0.060791	-0.0169	0.584717	0.711532	0.961426	1.46157	2.62939	3.12904
	19.82	-0.316895	-0.01627	0.508301	0.712766	1.02954	1.46395	2.78638	3.13346
	19.92	-0.141113	-0.01565	0.448975	0.713999	0.898193	1.46633	2.95044	3.13787
	20.02	-0.0209961	-0.01502	0.503662	0.715232	1.20825	1.4687	3.11304	3.14229
	20.12	0.106445	-0.01439	0.481689	0.716465	1.23658	1.47108	2.85913	3.1467
	20.22	-0.0568848	-0.01376	0.701904	0.717698	1.14575	1.47345	3.0769	3.1511
	20.32	0.034668	-0.01313	0.936523	0.71893	1.02002	1.47583	2.90356	3.15551
	20.42	0.125732	-0.01251	0.856689	0.720162	1.17236	1.4782	3.1543	3.15991
	20.52	0.0397949	-0.01188	0.882324	0.721394	1.36914	1.48057	2.7019	3.1643
	20.62	0.168945	-0.01125	0.843262	0.722626	1.60032	1.48294	3.08472	3.1687
	20.72	-0.286621	-0.01062	0.512939	0.723857	1.14502	1.48531	3.08252	3.17309
	20.82	0.0581055	-0.01	1.00684	0.725088	1.31616	1.48768	2.83716	3.17748
	20.92	0.0432129	-0.00937	0.811523	0.726319	1.10522	1.49005	3.00684	3.18186
	21.02	-0.125	-0.00874	0.769775	0.72755	1.14502	1.49242	2.8606	3.18624
	21.12	-0.0710449	-0.00811	0.697266	0.728781	1.48342	1.49479	2.85913	3.19062
	21.22	0.131348	-0.00749	1.06274	0.730011	1.66992	1.49715	3.1604	3.19499
	21.32	-0.0395508	-0.00686	0.948975	0.731241	1.55615	1.49952	3.0061	3.19936
	21.42	-0.145996	-0.00623	0.494141	0.732471	0.927002	1.50188	3.08325	3.20373
	21.52	-0.161621	-0.0056	0.752686	0.733701	1.20508	1.50424	3.06445	3.2081
	21.62	0.164063	-0.00498	0.802734	0.73493	1.47315	1.50661	3.07056	3.21246
	21.72	-0.138184	-0.00435	0.776123	0.73616	1.15894	1.50897	2.89014	3.21682
	21.82	-0.10376	-0.00372	0.562012	0.737388	1.3833	1.51133	2.77368	3.22117
	21.92	-0.239746	-0.0031	0.538086	0.738617	1.13892	1.51369	2.87305	3.22552
	22.02	-0.366943	-0.00247	0.572266	0.739846	1.12402	1.51605	2.97949	3.22987
	22.12	0.174561	-0.00184	0.702148	0.741074	1.37792	1.51841	3.02637	3.23421
	22.22	-0.0209961	-0.00121	0.619141	0.742302	1.2583	1.52076	3.01294	3.23856
	22.32	0.0134277	-0.000588	0.858398	0.74353	1.50146	1.52312	3.03418	3.2429
	22.42	-0.341309	3.87e-05	0.233398	0.744758	0.802002	1.52547	2.69336	3.24723
	22.52	-0.0693359	0.000665	0.613037	0.745985	1.21387	1.52783	2.91382	3.25156
	22.62	-0.0834961	0.00129	0.92627	0.747212	1.0996	1.53018	3.18408	3.25589
	22.72	-0.231201	0.00192	0.669922	0.748439	0.769287	1.53254	3.06616	3.26022
	22.82	-0.231201	0.00254	0.623047	0.749666	1.14575	1.53489	2.99341	3.26454
	22.92	0.0375977	0.00317	0.906738	0.750892	1.56543	1.53724	3.20044	3.26886
	23.02	0.0876465	0.0038	0.94751	0.752118	1.17163	1.53959	3.36377	3.27318
	23.12	-0.411621	0.00442	0.669189	0.753344	1.02858	1.54194	2.90039	3.27749
	23.22	-0.143555	0.00505	0.858398	0.75457	1.36548	1.54429	3.21313	3.2818
	23.32	-0.0981445	0.00568	0.737305	0.755796	1.59204	1.54663	3.23169	3.28611
	23.42	-0.162354	0.0063	0.816895	0.757021	1.19043	1.54898	2.97534	3.29041
	23.52	-0.467041	0.00693	0.55127	0.758246	0.97168	1.55133	2.86694	3.29471
	23.62	-0.375732	0.00755	0.434082	0.759471	1.22463	1.55367	3.08252	3.29901
	23.72	0.0290527	0.00818	0.803467	0.760696	1.63159	1.55601	3.28857	3.3033
	23.82	-0.106934	0.00881	0.369141	0.76192	1.20654	1.55836	2.98706	3.30759
	23.92	-0.305176	0.00943	0.4646	0.763144	1.15601	1.5607	3.00903	3.31188
	24.02	-0.0739746	0.010058	1.05908	0.764368	1.4873	1.56304	3.177	3.31616
	24.12	0.0266113	0.010683	1.08862	0.765592	1.54955	1.56538	3.24805	3.32044
	24.22	-0.191406	0.011309	1.14648	0.766815	1.43018	1.56772	3.2356	3.32472
	24.32	-0.21875	0.011935	0.747314	0.768039	1.32544	1.57006	3.08398	3.329
	24.42	-0.0114746	0.01256	0.738037	0.769262	1.59521	1.5724	3.2771	3.33327
	24.52	0.14624	0.013186	0.920654	0.770485	1.43091	1.57474	3.44727	3.33754
	24.62	0.0727539	0.013811	0.645752	0.771707	1.23168	1.57707	3.29102	3.3418
	24.72	-0.133301	0.014436	0.4646	0.77293	1.24048	1.57941	2.80762	3.34606
	24.82	0.101563	0.015062	0.803467	0.774152	1.73486	1.58174	3.52612	3.35032
	24.92	-0.405273	0.015687	0.67627	0.775374	1.05518	1.58408	3.18408	3.35458
	25.02	-0.186523	0.016312	0.785645	0.776595	1.42627	1.58641	3.31689	3.35883
	25.12	-0.215576	0.016937	0.876953	0.777817	1.52222	1.58874	3.10498	3.36308
	25.22	-0.187256	0.017562	0.831055	0.779038	1.36548	1.59107	3.13721	3.36733
	25.32	-0.224121	0.018187	0.84668	0.780259	1.2522	1.5934	3.2583	3.37157
	25.42	-0.158447	0.018812	0.820068	0.78148	1.57935	1.59573	3.20605	3.37581
	25.52	-0.231934	0.019437	0.898682	0.7827	1.45435	1.59806	3.29492	3.38004
	25.62	0.000244	0.020062	0.771484	0.783921	1.44337	1.60039	3.35425	3.38428
	25.72	0.017334	0.020686	1.2207	0.785141	1.69043	1.60271	3.39819	3.38851
	25.82	-0.046875	0.021311	0.769043	0.786361	1.77002	1.60504	3.56689	3.39274
	25.92	-0.0529785	0.021936	0.809082	0.78758	1.30054	1.60736	3.21045	3.39696
	26.02	0.0861816	0.02256	0.862305	0.7888	1.28564	1.60969	3.28418	3.40118
	26.12	0.387695	0.023185	0.874756	0.790019	1.35449	1.61201	3.28564	3.4054
	26.22	-0.0061	0.023809	0.772217	0.791238	1.47778	1.61433	3.45679	3.40961
	26.32	0.264893	0.024434	0.844238	0.792457	1.44653	1.61665	3.40967	3.41383
	26.42	-0.237305	0.025058	0.545166	0.793675	1.14429	1.61898	3.17236	3.41803
	26.52	-0.0515137	0.025682	0.834717	0.794893	1.48169	1.6213	3.62451	3.42224
	26.62	0.0251465	0.026307	0.999512	0.796112	1.43873	1.62361	3.33081	3.42644
	26.72	-0.112305	0.026931	1.10767	0.797329	1.53564	1.62593	3.57544	3.43064
	26.82	-0.0100098	0.027555	1.03809	0.798547	1.33643	1.62825	3.60742	3.43484
	26.92	0.0534668	0.028179	0.772461	0.799764	1.65527	1.63057	3.33496	3.43903
	27.02	0.210938	0.028803	0.930908	0.800982	1.6543	1.63288	3.40503	3.44322
	27.12	0.122803	0.029427	0.914551	0.802198	1.60424	1.6352	3.59326	3.44741
	27.22	0.0532227	0.030051	0.703613	0.803415	1.55591	1.63751	3.40356	3.45159
	27.32	0.0664063	0.030675	0.888672	0.804632	1.7207	1.63982	3.573	3.45577
	27.42	0.0681152	0.031298	0.871338	0.805848	1.52612	1.64213	3.45264	3.45995
	27.52	-0.0124512	0.031922	1.00586	0.807064	1.48804	1.64445	3.57617	3.46412
	27.62	-0.217041	0.032546	0.790283	0.80828	1.52173	1.64676	3.52856	3.46829
	27.72	0.116455	0.033169	1.01831	0.809495	1.57544	1.64907	3.2644	3.47246
	27.82	-0.0373535	0.033793	0.970703	0.810711	1.51855	1.65137	3.67456	3.47663
	27.92	0.0812988	0.034416	1.03711	0.811926	1.47461	1.65368	3.4292	3.48079
	28.02	0.0290527	0.03504	0.602051	0.813141	1.4436	1.65599	3.45825	3.48495
	28.12	-0.015625	0.035663	0.826904	0.814355	1.5847	1.65829	3.50122	3.4891
	28.22	-0.246094	0.036287	0.593262	0.81557	1.11914	1.6606	3.16528	3.49326
	28.32	-0.128906	0.03691	0.536377	0.816784	1.30908	1.6629	3.29419	3.4974
	28.42	0.10791	0.037533	1.02856	0.817998	1.43701	1.66521	3.30029	3.50155
	28.52	0.315674	0.038156	1.02393	0.819212	1.6123	1.66751	3.66846	3.50569
	28.62	-0.269287	0.038779	0.712891	0.820425	1.39284	1.66981	3.59888	3.50983
	28.72	-0.092041	0.039402	0.902832	0.821639	1.25366	1.67211	3.43555	3.51397
	28.82	-0.373291	0.040025	0.754395	0.822852	1.54102	1.67441	3.4231	3.51811
	28.92	-0.182861	0.040648	0.635498	0.824065	1.39893	1.67671	3.13867	3.52224
	29.02	0.0361328	0.041271	0.826172	0.825277	1.21777	1.67901	3.45508	3.52637
	29.12	0.148438	0.041894	0.95752	0.82649	1.49585	1.68131	3.67456	3.53049
	29.22	-0.207031	0.042516	0.845703	0.827702	1.63403	1.6836	3.60352	3.53461
	29.32	-0.224121	0.043139	0.69165	0.828914	1.43018	1.6859	3.46899	3.53873
	29.42	-0.0827637	0.043762	0.8396	0.830126	1.33252	1.6882	3.32007	3.54285
	29.52	0.0922852	0.044384	0.997314	0.831337	1.63501	1.69049	3.4873	3.54696
	29.62	0.122803	0.045007	0.887207	0.832548	1.71996	1.69278	3.53247	3.55107
	29.72	-0.0327148	0.045629	0.509766	0.83376	1.67773	1.69508	3.45898	3.55518
	29.82	0.0251465	0.046252	0.83252	0.83497	1.49829	1.69737	3.52466	3.55928
	29.92	-0.0930176	0.046874	0.730713	0.836181	1.59814	1.69966	3.56274	3.56338
	30.02	-0.110596	0.047496	0.972412	0.837391	1.55518	1.70195	3.56763	3.56748
	30.12	0.212646	0.048118	0.969238	0.838602	1.6748	1.70424	3.58423	3.57157
	30.22	0.207275	0.048741	0.943359	0.839812	1.6709	1.70652	3.57153	3.57566
	30.32	0.191406	0.049363	1.0105	0.841021	1.73633	1.70881	3.81299	3.57975
	30.42	0.15332	0.049985	1.13721	0.842231	1.72705	1.7111	3.92871	3.58384
	30.52	0.0322266	0.050607	0.838623	0.84344	1.51538	1.71338	3.40991	3.58792
	30.62	0.146973	0.051229	1.09009	0.844649	1.78787	1.71567	3.67212	3.592
	30.72	0.814209	0.05185	1.29199	0.845858	2.09668	1.71795	3.88794	3.59607
	30.82	0.229736	0.052472	1.23462	0.847067	1.84497	1.72024	3.77759	3.60015
	30.92	-0.0498047	0.053094	1.08105	0.848275	1.70361	1.72252	3.6958	3.60422
	31.02	0.215088	0.053716	1.21924	0.849483	1.78174	1.7248	4.13721	3.60828
	31.12	-0.207764	0.054337	0.901855	0.850691	1.64332	1.72708	3.80347	3.61235
	31.22	0.0305176	0.054959	1.08179	0.851899	2.03882	1.72936	3.89575	3.61641
	31.32	-0.123291	0.05558	0.762939	0.853106	1.51074	1.73164	3.93237	3.62047
	31.42	-0.107666	0.056202	0.789551	0.854313	1.64746	1.73392	3.35986	3.62452
	31.52	-0.0905762	0.056823	1.22388	0.85552	1.72778	1.73619	3.99268	3.62857
	31.62	0.139893	0.057445	1.08472	0.856727	2.12865	1.73847	3.87231	3.63262
	31.72	0.122803	0.058066	0.831787	0.857934	1.76929	1.74074	3.58472	3.63667
	31.82	0.0500488	0.058687	0.837158	0.85914	1.78711	1.74302	3.65186	3.64071
	31.92	-0.0107422	0.059308	0.920898	0.860346	1.83813	1.74529	3.43164	3.64475
	32.02	-0.0327148	0.059929	1.07788	0.861552	1.82788	1.74757	3.94727	3.64879
	32.12	0.0698242	0.06055	0.833252	0.862758	1.93335	1.74984	3.70752	3.65282
	32.22	0.0930176	0.061171	0.923828	0.863963	2.07935	1.75211	3.70117	3.65686
	32.32	0.311035	0.061792	1.12866	0.865169	2.14429	1.75438	3.85034	3.66088
	32.42	-0.0405273	0.062413	0.877686	0.866374	1.78027	1.75665	3.81616	3.66491
	32.52	0.0195313	0.063034	1.09033	0.867578	2.0708	1.75892	3.7981	3.66893
	32.62	0.174316	0.063655	0.94165	0.868783	1.9309	1.76118	4.09644	3.67295
	32.72	0.221924	0.064276	1.09717	0.869987	1.94263	1.76345	3.62305	3.67697
	32.82	0.156494	0.064896	0.871582	0.871192	1.89648	1.76572	4.02002	3.68098
	32.92	0.288574	0.065517	1.24268	0.872395	1.80835	1.76798	3.43872	3.68499
	33.02	0.270508	0.066137	1.04175	0.873599	1.84741	1.77025	3.97144	3.689
	33.12	0.333008	0.066758	1.07007	0.874802	1.89038	1.77251	3.81445	3.693
	33.22	-0.0146484	0.067378	1.35376	0.876006	1.95142	1.77477	3.71069	3.697
	33.32	0.0979004	0.067999	1.07471	0.877209	1.99976	1.77704	3.88794	3.701
	33.42	-0.0419922	0.068619	0.913086	0.878412	1.6521	1.7793	3.63403	3.70499
	33.52	0.0827637	0.069239	0.683105	0.879614	1.77783	1.78156	3.78149	3.70899
	33.62	0.100342	0.069859	1.05908	0.880816	1.93408	1.78382	4.1748	3.71298
	33.72	0.0383301	0.07048	1.03247	0.882019	2.12305	1.78608	3.81519	3.71696
	33.82	0.0898438	0.0711	1.00903	0.88322	1.73779	1.78833	3.5542	3.72095
	33.92	-0.127197	0.07172	0.748779	0.884422	1.91309	1.79059	3.74976	3.72493
	34.02	-0.00366	0.07234	0.968506	0.885623	2.06299	1.79285	3.92236	3.7289
	34.12	0.0524902	0.072959	1.03174	0.886825	1.77636	1.7951	3.96777	3.73288
	34.22	-0.165527	0.073579	0.677734	0.888026	1.76831	1.79736	3.83936	3.73685
	34.32	0.0703125	0.074199	0.844971	0.889226	1.78564	1.79961	3.62915	3.74082
	34.42	0.39624	0.074819	1.18237	0.890427	1.94434	1.80186	3.92065	3.74478
	34.52	0.544678	0.075438	1.34961	0.891627	2.18018	1.80411	4.12939	3.74875
	34.62	0.293213	0.076058	1.03638	0.892827	1.7998	1.80636	3.72168	3.75271
	34.72	0.0454102	0.076678	1.07007	0.894027	1.9707	1.80861	3.82153	3.75666
	34.82	-0.0107422	0.077297	1.15674	0.895227	1.72778	1.81086	3.79736	3.76062
	34.92	-0.0170898	0.077917	0.852783	0.896426	1.83008	1.81311	3.83179	3.76457
	35.02	0.218994	0.078536	1.36768	0.897626	2.25122	1.81536	4.16919	3.76852
	35.12	0.476563	0.079155	1.38623	0.898825	2.16209	1.81761	4.25122	3.77246
	35.22	0.00879	0.079775	1.10132	0.900023	1.82642	1.81985	4.052	3.7764
	35.32	0.169678	0.080394	1.21924	0.901222	1.53174	1.8221	3.93945	3.78034
	35.42	-0.147461	0.081013	0.834961	0.90242	1.53491	1.82434	3.62939	3.78428
	35.52	-0.129395	0.081632	1.12939	0.903618	1.49121	1.82659	3.72559	3.78821
	35.62	-0.166992	0.082251	0.978516	0.904816	1.97951	1.82883	3.99097	3.79214
	35.72	-0.194336	0.08287	1.42798	0.906014	2.07568	1.83107	3.99658	3.79607
	35.82	-0.00293	0.083489	1.18945	0.907211	1.85376	1.83331	3.90918	3.79999
	35.92	0.185303	0.084108	0.959717	0.908408	1.85913	1.83555	3.9895	3.80392
	36.02	0.0227051	0.084727	0.908936	0.909605	1.85205	1.83779	3.97705	3.80784
	36.12	0.38623	0.085345	1.29663	0.910802	2.01683	1.84003	4.29883	3.81175
	36.22	0.0290527	0.085964	0.972168	0.911999	1.98389	1.84227	4.2395	3.81566
	36.32	0.10498	0.086583	1.18579	0.913195	2.03882	1.8445	4.02783	3.81957
	36.42	-0.0327148	0.087201	0.820801	0.914391	1.62622	1.84674	3.83472	3.82348
	36.52	-0.149902	0.08782	1.23486	0.915587	1.84814	1.84898	3.94019	3.82739
	36.62	0.218994	0.088438	1.44116	0.916783	1.98949	1.85121	4.23096	3.83129
	36.72	-0.0131836	0.089057	1.15967	0.917978	1.84814	1.85344	4.29883	3.83519
	36.82	0.222656	0.089675	1.00806	0.919173	2.10034	1.85568	4.11914	3.83908
	36.92	0.363525	0.090293	1.14746	0.920368	2.02563	1.85791	4.19751	3.84297
	37.02	0.0939941	0.090912	0.759033	0.921563	1.54126	1.86014	3.90356	3.84686
	37.12	0.149414	0.09153	1.10669	0.922758	1.8616	1.86237	4.14893	3.85075
	37.22	0.0932617	0.092148	1.41528	0.923952	2.22412	1.8646	4.32324	3.85463
	37.32	-0.250732	0.092766	1.1106	0.925146	1.89966	1.86683	4.2168	3.85852
	37.42	-0.0419922	0.093384	1.02222	0.92634	1.9856	1.86905	3.75269	3.86239
	37.52	-0.0834961	0.094002	1.0293	0.927534	1.71777	1.87128	4.12549	3.86627
	37.62	-0.131104	0.09462	0.968506	0.928727	1.66162	1.87351	4.05444	3.87014
	37.72	-0.0256348	0.095238	0.913818	0.92992	1.91064	1.87573	4.01685	3.87401
	37.82	0.180664	0.095855	1.04736	0.931113	2.09595	1.87796	4.23267	3.87788
	37.92	0.38916	0.096473	1.12695	0.932306	2.09033	1.88018	4.32617	3.88174
	38.02	0.0517578	0.097091	0.936279	0.933499	1.66675	1.8824	4.28564	3.8856
	38.12	-0.163818	0.097708	1.07007	0.934691	1.95142	1.88463	4.08252	3.88946
	38.22	0.173584	0.098326	1.03784	0.935883	2.17163	1.88685	4.15747	3.89332
	38.32	0.226807	0.098943	0.647461	0.937075	1.65918	1.88907	3.9209	3.89717
	38.42	0.10083	0.099561	0.951172	0.938266	1.80029	1.89129	4.05811	3.90102
	38.52	0.193848	0.100178	1.26123	0.939458	2.16528	1.8935	4.35815	3.90487
	38.62	0.12207	0.100796	1.17383	0.940649	1.83179	1.89572	4.3396	3.90871
	38.72	0.169678	0.101413	1.1333	0.94184	1.99268	1.89794	4.23804	3.91255
	38.82	0.124268	0.10203	0.964355	0.943031	1.99731	1.90016	3.98633	3.91639
	38.92	0.0610352	0.102647	0.981689	0.944221	1.78101	1.90237	4.10205	3.92022
	39.02	0.0776367	0.103264	1.01465	0.945412	1.86768	1.90459	4.33716	3.92406
	39.12	-0.0600586	0.103881	0.921631	0.946602	1.98805	1.9068	4.18872	3.92789
	39.22	0.301514	0.104498	1.47607	0.947792	2.08325	1.90901	4.28149	3.93171
	39.32	-0.119385	0.105115	0.804443	0.948981	2.06616	1.91122	4.25439	3.93554
	39.42	-0.0466309	0.105732	0.924561	0.950171	1.7998	1.91344	4.09351	3.93936
	39.52	0.0820313	0.106349	0.892578	0.95136	1.75342	1.91565	4.1106	3.94318
	39.62	0.346191	0.106966	1.21143	0.952549	1.97947	1.91786	4.64331	3.94699
	39.72	-0.106934	0.107582	0.72998	0.953738	1.88794	1.92006	4.02539	3.9508
	39.82	0.095459	0.108199	1.03003	0.954927	2.01685	1.92227	4.36987	3.95461
	39.92	-0.373291	0.108815	0.94165	0.956115	1.92627	1.92448	3.70972	3.95842
	40.02	0.0510254	0.109432	1.20581	0.957303	2.39429	1.92669	4.27856	3.96222
	40.12	0.0634766	0.110048	0.765381	0.958491	1.88039	1.92889	4.18091	3.96602
	40.22	0.186035	0.110665	1.08862	0.959679	2.02393	1.9311	4.21533	3.96982
	40.32	0.173584	0.111281	1.43018	0.960866	2.3208	1.9333	4.42383	3.97362
	40.42	0.287842	0.111897	1.28882	0.962053	2.1936	1.9355	4.13965	3.97741
	40.52	0.226074	0.112514	1.15601	0.96324	2.02075	1.93771	4.31689	3.9812
	40.62	0.168945	0.11313	0.930176	0.964427	1.78711	1.93991	3.88403	3.98499
	40.72	0.154785	0.113746	1.16602	0.965614	1.82227	1.94211	4.0708	3.98877
	40.82	-0.0239258	0.114362	1.35522	0.9668	2.04199	1.94431	4.22314	3.99255
	40.92	-0.192139	0.114978	1.14111	0.967986	1.67065	1.94651	4.14258	3.99633
	41.02	0.203125	0.115594	1.22925	0.969172	1.92944	1.9487	4.31909	4.00011
	41.12	-0.109375	0.11621	0.754395	0.970358	1.79738	1.9509	4.21753	4.00388
	41.22	0.00952	0.116826	1.00269	0.971543	1.93872	1.9531	4.33716	4.00765
	41.32	0.355469	0.117441	1.12061	0.972729	2.18164	1.95529	4.32935	4.01142
	41.42	-0.263184	0.118057	0.83252	0.973914	1.94434	1.95749	4.24121	4.01518
	41.52	0.0681152	0.118673	1.04028	0.975098	2.0293	1.95968	4.28003	4.01895
	41.62	-0.0546875	0.119288	0.937744	0.976283	2.08937	1.96188	4.0144	4.02271
	41.72	0.212646	0.119904	0.950439	0.977467	2.16235	1.96407	4.43188	4.02646
	41.82	0.190674	0.120519	1.09009	0.978652	2.20752	1.96626	4.48462	4.03022
	41.92	-0.115479	0.121135	0.978516	0.979835	2.02563	1.96845	4.07227	4.03397
	42.02	-0.0334473	0.12175	0.840332	0.981019	1.83496	1.97064	4.02002	4.03771
	42.12	0.322754	0.122366	1.00415	0.982203	2.07298	1.97283	4.46509	4.04146
	42.22	-0.0529785	0.122981	0.662842	0.983386	1.75366	1.97502	3.88867	4.0452
	42.32	0.424316	0.123596	1.26294	0.984569	2.20532	1.97721	4.46777	4.04894
	42.42	0.117188	0.124211	0.895752	0.985752	2.12769	1.97939	4.43311	4.05268
	42.52	0.0524902	0.124826	0.848877	0.986934	1.93408	1.98158	4.17236	4.05641
	42.62	0.0385742	0.125441	1.00684	0.988117	1.9529	1.98376	4.62695	4.06014
	42.72	0.32666	0.126056	1.05054	0.989299	2.47168	1.98595	4.61304	4.06387
	42.82	0.193848	0.126671	0.994873	0.990481	2.26514	1.98813	4.37305	4.0676
	42.92	-0.0622559	0.127286	1.14893	0.991663	1.97949	1.99031	4.11523	4.07132
	43.02	0.344727	0.127901	0.823975	0.992844	2.03247	1.9925	4.13867	4.07504
	43.12	0.346924	0.128516	1.06519	0.994026	2.33788	1.99468	4.4729	4.07876
	43.22	0.251709	0.12913	0.94873	0.995207	1.97534	1.99686	4.25732	4.08247
	43.32	0.370361	0.129745	1.19165	0.996388	2.24658	1.99904	4.03003	4.08619
	43.42	0.111816	0.130359	1.13086	0.997568	2.07617	2.00122	3.96826	4.08989
	43.52	-0.0178223	0.130974	0.803711	0.998749	1.9021	2.00339	4.1731	4.0936
	43.62	0.320313	0.131588	0.952637	0.999929	2.16064	2.00557	4.32837	4.0973
	43.72	0.242432	0.132203	0.965332	1.00111	2.14746	2.00775	4.41284	4.10101
	43.82	-0.123291	0.132817	0.895752	1.00229	2.01221	2.00992	4.27466	4.1047
	43.92	0.064209	0.133431	0.790283	1.00347	1.89746	2.0121	4.36841	4.1084
	44.02	0.228271	0.134046	0.936279	1.00465	2.20117	2.01427	4.31982	4.11209
	44.12	0.23999	0.13466	1.00903	1.00583	1.84718	2.01644	4.3457	4.11578
	44.22	0.159424	0.135274	0.916748	1.00701	2.10669	2.01861	4.50439	4.11947
	44.32	0.0854492	0.135888	0.917725	1.00818	1.83032	2.02079	4.03027	4.12315
	44.42	0.135254	0.136502	1.23096	1.00936	2.177	2.02296	4.40039	4.12683
	44.52	0.178223	0.137116	1.16064	1.01054	2.18872	2.02513	4.24902	4.13051
	44.62	0.100098	0.13773	0.906006	1.01172	2.0747	2.0273	4.55518	4.13419
	44.72	0.26123	0.138344	0.954346	1.0129	2.26855	2.02946	4.40674	4.13786
	44.82	0.508057	0.138957	0.900391	1.01407	2.32715	2.03163	4.68335	4.14153
	44.92	0.40625	0.139571	0.997314	1.01525	2.08179	2.0338	4.54883	4.1452
	45.02	0.0783691	0.140185	0.883301	1.01643	1.8833	2.03596	4.51611	4.14887
	45.12	0.127441	0.140798	1.27466	1.01761	2.20189	2.03813	4.77612	4.15253
	45.22	0.247803	0.141412	0.937012	1.01878	2.29565	2.04029	4.33398	4.15619
	45.32	0.0227051	0.142026	1.17847	1.01996	1.87402	2.04246	4.16284	4.15985
	45.42	-0.0256348	0.142639	0.688721	1.02114	1.99194	2.04462	4.22949	4.1635
	45.52	0.269043	0.143252	1.31152	1.02231	2.22632	2.04678	4.65991	4.16715
	45.62	0.115723	0.143866	1.02637	1.02349	1.93482	2.04894	4.40918	4.1708
	45.72	0.19165	0.144479	1.14819	1.02466	2.11841	2.0511	4.63721	4.17445
	45.82	0.0390625	0.145092	1.04102	1.02584	2.16357	2.05326	4.50122	4.17809
	45.92	0.0893555	0.145705	1.46143	1.02701	2.38965	2.05542	4.2207	4.18173
	46.02	0.269531	0.146318	1.16748	1.02819	2.30737	2.05758	4.61133	4.18537
	46.12	0.292236	0.146931	1.21069	1.02936	2.18481	2.05973	4.55737	4.18901
	46.22	0.171875	0.147544	1.04492	1.03054	2.21606	2.06189	4.50977	4.19264
	46.32	-0.127197	0.148157	0.776855	1.03171	2.10889	2.06404	4.42993	4.19627
	46.42	-0.254639	0.14877	0.858154	1.03289	2.2793	2.0662	4.00439	4.1999
	46.52	-0.0302734	0.149383	1.2168	1.03406	2.31689	2.06835	4.50049	4.20352
	46.62	0.181396	0.149996	0.924072	1.03523	2.37647	2.07051	4.26147	4.20714
	46.72	0.23999	0.150608	0.880859	1.03641	2.39258	2.07266	4.47534	4.21076
	46.82	0.0244141	0.151221	0.869141	1.03758	2.31299	2.07481	4.43799	4.21438
	46.92	-0.0583496	0.151834	0.806641	1.03875	1.93335	2.07696	4.18555	4.21799
	47.02	0.0698242	0.152446	0.973877	1.03993	1.87866	2.07911	4.09814	4.22161
	47.12	0.26416	0.153059	1.02393	1.0411	2.22459	2.08126	4.49268	4.22521
	47.22	0.117188	0.153671	0.88623	1.04227	1.99097	2.08341	4.24414	4.22882
	47.32	0.135986	0.154283	0.966064	1.04344	2.04639	2.08555	4.41992	4.23242
	47.42	0.0187988	0.154896	0.862061	1.04461	2.18335	2.0877	4.43408	4.23602
	47.52	0.10791	0.155508	1.06665	1.04579	2.20044	2.08985	4.29883	4.23962
	47.62	-0.0200195	0.15612	0.822266	1.04696	1.7466	2.09199	4.48096	4.24322
	47.72	0.521973	0.156732	1.35669	1.04813	2.4458	2.09413	4.64795	4.24681
	47.82	-0.241943	0.157344	1.04736	1.0493	2.07324	2.09628	4.29175	4.2504
	47.92	0.106445	0.157956	0.944824	1.05047	2.15894	2.09842	4.34888	4.25399
	48.02	0.183105	0.158568	1.24731	1.05164	2.39893	2.10056	4.64111	4.25757
	48.12	0.411133	0.15918	1.28467	1.05281	2.35594	2.1027	4.64502	4.26115
	48.22	0.00732	0.159792	1.09351	1.05398	2.32397	2.10484	4.29272	4.26473
	48.32	-0.0234375	0.160404	1.13721	1.05515	2.14331	2.10698	4.58936	4.26831
	48.42	0.0617676	0.161015	0.967529	1.05632	2.40894	2.10912	4.76123	4.27188
	48.52	0.35083	0.161627	1.11206	1.05749	2.37842	2.11126	4.55981	4.27545
	48.62	0.197754	0.162239	1.23169	1.05866	2.56223	2.1134	4.83325	4.27902
	48.72	-0.000732	0.16285	1.03174	1.05983	2.04102	2.11553	4.53564	4.28259
	48.82	-0.0466309	0.163462	1.01538	1.061	2.25684	2.11767	4.57471	4.28615
	48.92	0.0688477	0.164073	1.20288	1.06217	2.10278	2.1198	4.5957	4.28971
	49.02	0.128174	0.164685	1.36304	1.06334	2.5708	2.12194	4.65747	4.29327
	49.12	-0.14502	0.165296	1.25757	1.0645	2.33422	2.12407	4.57617	4.29683
	49.22	0.0461426	0.165907	0.952637	1.06567	2.27393	2.1262	4.51514	4.30038
	49.32	0.48291	0.166518	1.6106	1.06684	2.58423	2.12833	4.66064	4.30393
	49.42	0.0595703	0.16713	1.30835	1.06801	2.36914	2.13046	4.89966	4.30748
	49.52	0.171143	0.167741	1.21753	1.06917	2.79028	2.13259	5.00903	4.31102
	49.62	0.0166016	0.168352	1.30054	1.07034	2.23558	2.13472	4.51611	4.31456
	49.72	-0.198975	0.168963	1.16382	1.07151	2.27881	2.13685	4.28955	4.3181
	49.82	0.242188	0.169574	1.12695	1.07268	2.24097	2.13898	4.84253	4.32164
	49.92	0.0944824	0.170184	1.14868	1.07384	2.30518	2.1411	4.63232	4.32517
	50.02	0.495361	0.170795	1.07007	1.07501	2.49658	2.14323	4.95679	4.32871
	50.12	0.286133	0.171406	1.1543	1.07617	2.6599	2.14535	4.77612	4.33223
	50.22	-0.0715332	0.172017	1.03418	1.07734	2.17871	2.14748	4.6272	4.33576
	50.32	-0.0427246	0.172627	0.942627	1.07851	2.12329	2.1496	4.55688	4.33928
	50.42	0.0244141	0.173238	1.052	1.07967	2.11621	2.15173	4.64429	4.34281
	50.52	0.110352	0.173849	1.0144	1.08084	2.25977	2.15385	4.52539	4.34632
	50.62	0.0390625	0.174459	0.945557	1.082	2.59327	2.15597	4.60181	4.34984
	50.72	0.0947266	0.175069	1.36621	1.08317	2.71631	2.15809	4.67798	4.35335
	50.82	0.126709	0.17568	1.10815	1.08433	2.448	2.16021	4.65503	4.35686
	50.92	0.413574	0.17629	1.20679	1.08549	2.51147	2.16233	4.92163	4.36037
	51.02	0.194824	0.1769	1.33496	1.08666	2.64038	2.16444	4.70361	4.36388
	51.12	0.186768	0.177511	1.44507	1.08782	2.54589	2.16656	4.79028	4.36738
	51.22	0.172119	0.178121	1.18091	1.08899	2.38184	2.16868	4.58398	4.37088
	51.32	0.307861	0.178731	1.02393	1.09015	2.43481	2.17079	4.92236	4.37438
	51.42	-0.105957	0.179341	1.15674	1.09131	2.49585	2.17291	4.552	4.37787
	51.52	0.429688	0.179951	1.52002	1.09248	2.47705	2.17502	4.79175	4.38137
	51.62	0.480713	0.180561	1.23804	1.09364	2.73168	2.17714	4.49902	4.38486
	51.72	0.206299	0.181171	1.37524	1.0948	2.47998	2.17925	4.61841	4.38834
	51.82	0.20874	0.18178	1.10596	1.09596	2.17163	2.18136	4.53955	4.39183
	51.92	0.229736	0.18239	1.2644	1.09713	2.38232	2.18347	4.62305	4.39531
	52.02	-0.0195313	0.183	0.97998	1.09829	2.19189	2.18558	4.39087	4.39879
	52.12	0.320313	0.183609	1.11987	1.09945	2.35667	2.18769	5.02148	4.40227
	52.22	0.279053	0.184219	0.865234	1.10061	2.30981	2.1898	4.65747	4.40574
	52.32	0.433105	0.184828	1.21289	1.10177	2.36377	2.19191	4.75195	4.40921
	52.42	0.565674	0.185438	1.00586	1.10293	2.54883	2.19401	5.0542	4.41268
	52.52	0.527344	0.186047	1.17529	1.10409	2.63086	2.19612	4.67456	4.41615
	52.62	0.584473	0.186657	1.35962	1.10525	2.64965	2.19823	4.71606	4.41961
	52.72	0.379883	0.187266	1.0144	1.10642	2.3169	2.20033	4.59106	4.42308
	52.82	0.261719	0.187875	0.991699	1.10758	2.41455	2.20243	4.4729	4.42653
	52.92	0.207031	0.188484	1.35596	1.10874	2.67307	2.20454	4.68408	4.42999
	53.02	0.0844727	0.189093	1.0708	1.1099	2.1177	2.20664	4.43237	4.43345
	53.12	0.203125	0.189702	0.990234	1.11105	2.26126	2.20874	4.4895	4.4369
	53.22	0.276611	0.190312	1.30493	1.11221	2.67526	2.21084	5.10181	4.44034
	53.32	0.0554199	0.19092	0.920654	1.11337	2.57226	2.21294	4.76758	4.44379
	53.42	0.219727	0.191529	1.06445	1.11453	2.22143	2.21504	4.85596	4.44723
	53.52	0.126709	0.192138	0.876221	1.11569	2.34986	2.21714	4.52393	4.45068
	53.62	0.0517578	0.192747	0.952148	1.11685	2.17874	2.21924	4.69434	4.45411
	53.72	0.433105	0.193356	1.51074	1.11801	2.68332	2.22133	5.19263	4.45755
	53.82	0.00317	0.193964	1.16992	1.11917	2.50832	2.22343	4.5542	4.46098
	53.92	0.389893	0.194573	1.35889	1.12032	2.80516	2.22553	4.97388	4.46441
	54.02	0.174316	0.195182	0.999512	1.12148	2.34254	2.22762	4.5769	4.46784
	54.12	0.289307	0.19579	1.24731	1.12264	2.38039	2.22971	4.70361	4.47127
	54.22	0.595459	0.196398	1.36133	1.1238	2.72386	2.23181	5.43091	4.47469
	54.32	0.32373	0.197007	1.4895	1.12495	2.50438	2.2339	4.927	4.47811
	54.42	0.115967	0.197615	1.06616	1.12611	2.38965	2.23599	4.35596	4.48153
	54.52	0.282959	0.198223	1.19946	1.12727	2.35352	2.23808	4.50195	4.48495
	54.62	0.0751953	0.198832	1.16846	1.12842	2.07325	2.24017	4.60059	4.48836
	54.72	0.172852	0.19944	0.973145	1.12958	2.21361	2.24226	4.53857	4.49177
	54.82	0.536865	0.200048	1.31909	1.13073	2.66457	2.24435	4.90967	4.49518
	54.92	0.582031	0.200656	1.49561	1.13189	2.78635	2.24644	5.13232	4.49858
	55.02	-0.0593262	0.201264	1.11279	1.13305	2.46145	2.24852	4.62915	4.50199
	55.12	0.289307	0.201872	1.12695	1.1342	2.60986	2.25061	4.43652	4.50539
	55.22	0.136719	0.20248	1.03076	1.13536	2.47144	2.25269	4.66138	4.50878
	55.32	0.388428	0.203087	1.1123	1.13651	2.56467	2.25478	5.16138	4.51218
	55.42	-0.0664063	0.203695	0.918213	1.13767	2.34716	2.25686	4.78247	4.51557
	55.52	-0.161621	0.204303	0.929443	1.13882	2.22169	2.25894	4.60205	4.51896
	55.62	-0.0529785	0.204911	0.913086	1.13997	2.26538	2.26103	4.43188	4.52235
	55.72	-0.234375	0.205518	1.02539	1.14113	2.40283	2.26311	4.26367	4.52573
	55.82	0.189209	0.206126	1.05054	1.14228	2.53246	2.26519	4.7998	4.52912
	55.92	-0.00928	0.206733	1.06763	1.14344	2.26832	2.26727	4.70117	4.5325
	56.02	0.101563	0.207341	1.03076	1.14459	2.38939	2.26935	4.88477	4.53588
	56.12	0.448486	0.207948	1.05908	1.14574	2.35204	2.27143	4.83789	4.53925
	56.22	-0.0022	0.208555	1.05811	1.14689	2.59498	2.2735	5.07373	4.54262
	56.32	0.0578613	0.209163	1.04419	1.14805	2.72779	2.27558	5.09106	4.54599
	56.42	0.271973	0.20977	1.04102	1.1492	2.52539	2.27766	4.68945	4.54936
	56.52	0.287598	0.210377	1.33716	1.15035	2.69018	2.27973	4.94336	4.55273
	56.62	0.0961914	0.210984	1.10889	1.1515	2.30593	2.2818	4.72534	4.55609
	56.72	0.22583	0.211591	1.18481	1.15266	2.60667	2.28388	4.86597	4.55945
	56.82	0.354004	0.212198	1.36353	1.15381	2.65674	2.28595	5.06372	4.56281
	56.92	0.362549	0.212805	1.31836	1.15496	2.53099	2.28802	5.0293	4.56616
	57.02	0.469727	0.213412	0.990967	1.15611	2.62233	2.29009	4.9856	4.56951
	57.12	0.264893	0.214019	1.43872	1.15726	2.64792	2.29217	5.14331	4.57286
	57.22	-0.000488	0.214625	1.02246	1.15841	2.18655	2.29423	4.67944	4.57621
	57.32	0.40332	0.215232	1.19043	1.15956	2.35057	2.2963	4.67236	4.57956
	57.42	0.21875	0.215839	1.11353	1.16071	2.31983	2.29837	4.88403	4.5829
	57.52	0.161865	0.216445	1.18628	1.16186	2.58153	2.30044	5.0481	4.58624
	57.62	0.104736	0.217052	1.3855	1.16301	2.60742	2.30251	4.94653	4.58958
	57.72	0.1875	0.217658	1.00977	1.16416	2.67627	2.30457	4.87549	4.59291
	57.82	0.0751953	0.218265	1.23804	1.16531	2.48952	2.30664	4.70044	4.59625
	57.92	0.392334	0.218871	1.45288	1.16646	2.87937	2.3087	5.10352	4.59958
	58.02	0.290771	0.219477	1.10352	1.16761	2.39187	2.31077	4.94116	4.60291
	58.12	0.383545	0.220084	1.38623	1.16876	2.48875	2.31283	4.93774	4.60623
	58.22	0.232178	0.22069	1.1958	1.16991	2.76149	2.31489	4.70435	4.60955
	58.32	0.213379	0.221296	1.33789	1.17106	2.70579	2.31695	5.23633	4.61287
	58.42	-0.0327148	0.221902	1.12231	1.1722	2.41847	2.31901	4.92065	4.61619
	58.52	-0.0942383	0.222508	1.53955	1.17335	2.55834	2.32107	4.96387	4.61951
	58.62	0.27832	0.223114	1.49414	1.1745	2.74023	2.32313	5.14111	4.62282
	58.72	0.346924	0.22372	1.29028	1.17565	2.45509	2.32519	4.77759	4.62613
	58.82	0.304199	0.224326	1.4209	1.1768	2.56471	2.32725	5.03027	4.62944
	58.92	0.343994	0.224931	1.40039	1.17794	2.4199	2.3293	5.00903	4.63274
	59.02	0.0812988	0.225537	1.13721	1.17909	2.574	2.33136	4.75757	4.63605
	59.12	0.21582	0.226143	1.42627	1.18024	2.75363	2.33341	5.20996	4.63935
	59.22	-0.14917	0.226748	1.10889	1.18138	2.30594	2.33547	4.71216	4.64265
	59.32	-0.499268	0.227354	0.878418	1.18253	2.13015	2.33752	4.38159	4.64594
	59.42	-0.0412598	0.22796	1.20898	1.18367	2.38941	2.33958	4.70972	4.64924
	59.52	0.178955	0.228565	1.27783	1.18482	2.50658	2.34163	4.82861	4.65253
	59.62	0.10498	0.22917	1.07007	1.18597	2.47781	2.34368	4.69043	4.65582
	59.72	0.549316	0.229776	1.28564	1.18711	2.48801	2.34573	5.12085	4.6591
	59.82	0.0163574	0.230381	1.13696	1.18826	2.73389	2.34778	4.96509	4.66239
	59.92	0.193115	0.230986	1.15894	1.1894	2.57934	2.34983	5.19653	4.66567
	60.02	0.323486	0.231591	1.09009	1.19055	2.6167	2.35188	5.10571	4.66895
	60.12	0.384521	0.232196	0.956543	1.19169	2.43334	2.35392	5.00732	4.67222
	60.22	0.195557	0.232802	1.05298	1.19284	2.2959	2.35597	4.84351	4.6755
	60.32	0.209473	0.233407	1.35278	1.19398	2.82078	2.35802	5.23315	4.67877
	60.42	0.0776367	0.234012	1.13501	1.19512	2.53028	2.36006	4.83716	4.68204
	60.52	0.281982	0.234616	1.16431	1.19627	2.33788	2.36211	4.84497	4.6853
	60.62	0.155762	0.235221	1.21606	1.19741	2.23169	2.36415	4.88647	4.68857
	60.72	0.0517578	0.235826	1.19263	1.19855	2.43237	2.36619	4.97852	4.69183
	60.82	0.486084	0.236431	1.50366	1.1997	2.64892	2.36824	5.22241	4.69509
	60.92	0.2229	0.237035	1.1521	1.20084	2.50757	2.37028	5.00439	4.69835
	61.02	0.0507813	0.23764	1.33081	1.20198	2.55347	2.37232	5.08252	4.7016
	61.12	0.458008	0.238245	1.29907	1.20313	2.75291	2.37436	5.14282	4.70485
	61.22	0.290039	0.238849	1.18628	1.20427	2.64821	2.3764	5.18018	4.7081
	61.32	0.271973	0.239453	1.16528	1.20541	2.66843	2.37844	5.05127	4.71135
	61.42	0.109619	0.240058	0.770752	1.20655	2.49832	2.38047	4.92163	4.71459
	61.52	0.237061	0.240662	1.44971	1.20769	2.73337	2.38251	5.01221	4.71784
	61.62	0.491455	0.241266	1.78101	1.20883	2.69335	2.38455	5.177	4.72108
	61.72	0.30249	0.241871	1.53394	1.20998	2.81519	2.38658	5.1333	4.72431
	61.82	-0.0192871	0.242475	0.952148	1.21112	2.39284	2.38862	4.86377	4.72755
	61.92	0.0673828	0.243079	1.4458	1.21226	2.7068	2.39065	4.8811	4.73078
	62.02	0.314941	0.243683	1.25439	1.2134	2.46288	2.39268	4.97852	4.73401
	62.12	0.218018	0.244287	1.13159	1.21454	2.52539	2.39472	4.9082	4.73724
	62.22	0.0515137	0.244891	1.10742	1.21568	2.43701	2.39675	5.04175	4.74047
	62.32	0.303223	0.245495	0.896484	1.21682	2.23023	2.39878	4.91138	4.74369
	62.42	0.366699	0.246099	1.26221	1.21796	2.7014	2.40081	4.90454	4.74691
	62.52	-0.113037	0.246702	1.10913	1.2191	2.39284	2.40284	4.71777	4.75013
	62.62	-0.167969	0.247306	1.34717	1.22024	2.64014	2.40487	4.7854	4.75335
	62.72	-0.0756836	0.24791	0.971436	1.22138	2.61132	2.4069	4.85889	4.75656
	62.82	0.125977	0.248513	1.14258	1.22252	2.53956	2.40892	5.02686	4.75977
	62.92	0.0454102	0.249117	1.32544	1.22365	2.94653	2.41095	5.11841	4.76298
	63.02	0.216553	0.24972	1.02246	1.22479	2.77002	2.41297	5.33398	4.76619
	63.12	0.111084	0.250324	1.05811	1.22593	2.50733	2.415	5.16748	4.76939
	63.22	0.300049	0.250927	1.19409	1.22707	2.72632	2.41702	5.19653	4.77259
	63.32	0.129883	0.25153	1.58813	1.22821	2.78882	2.41905	5.04028	4.77579
	63.42	0.368896	0.252134	1.41064	1.22934	2.71288	2.42107	5.03003	4.77899
	63.52	0.172607	0.252737	1.30981	1.23048	2.62941	2.42309	5.15649	4.78218
	63.62	0.5979	0.25334	1.24121	1.23162	2.95458	2.42511	5.33813	4.78537
	63.72	0.289063	0.253943	1.43555	1.23276	2.52784	2.42713	5.15039	4.78856
	63.82	0.261719	0.254546	1.14185	1.23389	2.4192	2.42915	5.09326	4.79175
	63.92	0.422852	0.255149	1.16992	1.23503	2.58471	2.43117	5.09497	4.79494
	64.02	0.339844	0.255752	1.09961	1.23617	2.6106	2.43319	5.20117	4.79812
	64.12	0.258789	0.256355	1.24268	1.2373	2.81861	2.43521	5.08325	4.8013
	64.22	0.358887	0.256958	1.45679	1.23844	2.61376	2.43722	5.33643	4.80448
	64.32	0.13916	0.257561	1.15503	1.23957	2.76905	2.43924	5.35962	4.80765
	64.42	0.325928	0.258163	1.44727	1.24071	2.86229	2.44125	5.30981	4.81083
	64.52	0.284424	0.258766	1.57544	1.24184	2.81227	2.44327	5.20288	4.814
	64.62	0.174316	0.259369	0.88623	1.24298	2.4966	2.44528	4.80908	4.81717
	64.72	0.324951	0.259971	1.25659	1.24411	2.87621	2.4473	4.96753	4.82033
	64.82	0.158691	0.260574	1.33081	1.24525	2.66993	2.44931	5.27759	4.8235
	64.92	0.495605	0.261176	1.58887	1.24638	2.83422	2.45132	5.2981	4.82666
	65.02	0.140869	0.261778	1.46753	1.24752	2.72706	2.45333	5.30591	4.82982
	65.12	0.145264	0.262381	1.35425	1.24865	2.74804	2.45534	5.24951	4.83297
	65.22	0.0251465	0.262983	1.34009	1.24978	2.61914	2.45735	5.25269	4.83613
	65.32	0.0737305	0.263585	1.21069	1.25092	2.55763	2.45936	5.30908	4.83928
	65.42	0.233887	0.264187	1.51855	1.25205	2.66918	2.46137	5.0918	4.84243
	65.52	0.0102539	0.264789	1.03784	1.25318	2.56618	2.46337	5.08716	4.84558
	65.62	0.238525	0.265391	1.28174	1.25432	2.6333	2.46538	5.24976	4.84872
	65.72	0.118164	0.265993	1.30054	1.25545	2.77466	2.46738	5.13184	4.85187
	65.82	0.281494	0.266595	1.50513	1.25658	2.87548	2.46939	5.04419	4.85501
	65.92	0.221924	0.267197	1.27783	1.25772	2.6294	2.47139	5.04419	4.85815
	66.02	0.423584	0.267799	1.25513	1.25885	2.87793	2.4734	5.18408	4.86128
	66.12	0.214844	0.268401	1.40259	1.25998	3.01513	2.4754	4.97217	4.86442
	66.22	0.320557	0.269002	1.04419	1.26111	2.63965	2.4774	4.88501	4.86755
	66.32	0.483643	0.269604	1.56519	1.26224	2.77854	2.4794	5.39111	4.87067
	66.42	0.0541992	0.270206	1.28638	1.26337	2.45288	2.4814	4.80444	4.8738
	66.52	-0.0397949	0.270807	1.02148	1.2645	2.36841	2.4834	5.04028	4.87693
	66.62	0.493896	0.271409	1.55884	1.26564	3.03955	2.4854	5.47461	4.88005
	66.72	0.518799	0.27201	1.58008	1.26677	2.81372	2.4874	5.19873	4.88317
	66.82	0.327393	0.272611	1.33252	1.2679	2.73633	2.48939	5.33398	4.88628
	66.92	0.121338	0.273213	1.58179	1.26903	2.6897	2.49139	5.25122	4.8894
	67.02	0.439941	0.273814	1.59888	1.27016	2.89892	2.49339	5.37305	4.89251
	67.12	0.361816	0.274415	1.49658	1.27129	2.67458	2.49538	5.01611	4.89562
	67.22	0.533936	0.275016	1.39893	1.27242	2.82957	2.49738	5.30688	4.89873
	67.32	0.28125	0.275617	1.56689	1.27355	2.73486	2.49937	5.17627	4.90184
	67.42	0.343994	0.276218	1.50977	1.27467	2.83886	2.50136	5.15601	4.90494
	67.52	0.203369	0.276819	1.27393	1.2758	2.90602	2.50335	5.07715	4.90804
	67.62	0.436035	0.27742	1.54102	1.27693	2.89573	2.50535	5.4292	4.91114
	67.72	0.175049	0.278021	1.34717	1.27806	2.79348	2.50734	5.21533	4.91424
	67.82	0.283691	0.278622	1.35278	1.27919	2.62624	2.50933	5.05737	4.91733
	67.92	0.556396	0.279223	1.37622	1.28032	2.97167	2.51131	5.29028	4.92042
	68.02	0.236816	0.279823	1.30127	1.28145	2.93019	2.5133	5.16919	4.92351
	68.12	0.388428	0.280424	1.43945	1.28257	2.89965	2.51529	5.24634	4.9266
	68.22	0.130615	0.281025	1.12134	1.2837	2.68409	2.51728	4.98633	4.92968
	68.32	0.30249	0.281625	1.50513	1.28483	2.74414	2.51926	5.24878	4.93277
	68.42	0.470459	0.282226	1.25659	1.28596	2.86916	2.52125	5.10815	4.93585
	68.52	0.366699	0.282826	1.58252	1.28708	2.96532	2.52323	5.47095	4.93893
	68.62	0.402344	0.283426	1.61743	1.28821	2.73878	2.52522	5.41748	4.942
	68.72	0.632813	0.284027	1.65894	1.28934	3.02856	2.5272	5.53955	4.94507
	68.82	0.389893	0.284627	1.22461	1.29046	2.69017	2.52918	5.04102	4.94815
	68.92	-0.0341797	0.285227	1.16382	1.29159	2.45606	2.53117	5.17627	4.95121
	69.02	0.0627441	0.285827	1.22559	1.29271	2.68725	2.53315	5.14282	4.95428
	69.12	0.245361	0.286427	1.15039	1.29384	2.69971	2.53513	5.03394	4.95735
	69.22	0.253418	0.287027	1.32251	1.29496	2.59985	2.53711	4.99976	4.96041
	69.32	0.32666	0.287627	1.40674	1.29609	3.01367	2.53908	5.31763	4.96347
	69.42	0.418945	0.288227	1.31934	1.29721	2.86303	2.54106	5.27783	4.96653
	69.52	0.431396	0.288827	1.33398	1.29834	2.8584	2.54304	5.38013	4.96958
	69.62	0.298584	0.289427	1.56445	1.29946	2.83253	2.54502	4.91382	4.97263
	69.72	0.211182	0.290027	1.58716	1.30059	2.59276	2.54699	5.35132	4.97568
	69.82	0.252686	0.290626	1.53027	1.30171	2.57961	2.54897	4.82861	4.97873
	69.92	0.623535	0.291226	1.22534	1.30284	2.78785	2.55094	5.31592	4.98178
	70.02	0.491699	0.291826	1.34106	1.30396	2.87939	2.55292	5.25366	4.98482
	70.12	0.862793	0.292425	1.39966	1.30508	3.21312	2.55489	5.52856	4.98787
	70.22	0.509521	0.293025	1.29883	1.30621	2.91139	2.55686	5.34326	4.9909
	70.32	0.308838	0.293624	1.22559	1.30733	2.57398	2.55883	5.05127	4.99394
	70.42	0.318115	0.294223	1.25659	1.30845	2.7466	2.5608	5.17065	4.99698
	70.52	0.535156	0.294823	1.26685	1.30958	2.91991	2.56277	5.4729	5.00001
	70.62	0.137695	0.295422	1.35205	1.3107	2.95215	2.56474	5.33081	5.00304
	70.72	0.255615	0.296021	1.23169	1.31182	2.81982	2.56671	5.11914	5.00607
	70.82	0.589111	0.29662	1.74023	1.31294	2.88256	2.56868	5.46997	5.00909
	70.92	0.402588	0.297219	1.44653	1.31406	2.96314	2.57065	5.27539	5.01212
	71.02	0.524414	0.297818	1.24658	1.31519	2.95898	2.57261	5.37158	5.01514
	71.12	0.0737305	0.298417	1.13574	1.31631	2.74048	2.57458	5.07324	5.01816
	71.22	0.213379	0.299016	1.03711	1.31743	2.43481	2.57654	5.01221	5.02118
	71.32	0.199463	0.299615	1.38574	1.31855	2.72094	2.57851	5.24341	5.02419
	71.42	0.331299	0.300214	1.32544	1.31967	2.77149	2.58047	5.16357	5.0272
	71.52	0.341553	0.300813	1.52539	1.32079	2.93798	2.58243	5.23096	5.03021
	71.62	0.30249	0.301411	1.51685	1.32191	2.77173	2.58439	5.24658	5.03322
	71.72	0.31665	0.30201	1.56836	1.32303	2.56153	2.58636	5.24023	5.03623
	71.82	0.352539	0.302608	1.60596	1.32415	2.66917	2.58832	5.42944	5.03923
	71.92	0.157227	0.303207	1.24438	1.32527	2.61232	2.59028	4.96606	5.04223
	72.02	0.292236	0.303805	1.52686	1.32639	2.63866	2.59224	5.43555	5.04523
	72.12	0.360352	0.304404	1.34717	1.32751	2.77539	2.59419	5.31763	5.04823
	72.22	0.353271	0.305002	1.45898	1.32863	2.77539	2.59615	5.35278	5.05122
	72.32	0.0205078	0.3056	1.30908	1.32975	2.6106	2.59811	5.23804	5.05422
	72.42	0.13208	0.306199	1.18091	1.33087	2.74099	2.60006	5.22388	5.05721
	72.52	0.412598	0.306797	1.42603	1.33199	3.0222	2.60202	5.44165	5.06019
	72.62	0.150146	0.307395	1.12793	1.3331	2.52004	2.60397	5.42236	5.06318
	72.72	0.486084	0.307993	1.63013	1.33422	2.97532	2.60593	5.3855	5.06616
	72.82	0.109375	0.308591	1.36987	1.33534	2.7395	2.60788	5.30811	5.06914
	72.92	0.0361328	0.309189	1.41846	1.33646	2.80201	2.60983	5.20654	5.07212
	73.02	0.328369	0.309787	1.65991	1.33758	2.84106	2.61179	5.27246	5.0751
	73.12	0.178223	0.310385	1.41846	1.33869	2.65212	2.61374	5.09741	5.07807
	73.22	0.259521	0.310983	1.38721	1.33981	3.09276	2.61569	5.39258	5.08105
	73.32	0.0703125	0.31158	1.18701	1.34093	2.9082	2.61764	5.23779	5.08402
	73.42	0.35083	0.312178	1.23315	1.34204	2.60989	2.61959	5.37695	5.08699
	73.52	0.421143	0.312776	1.53882	1.34316	2.78562	2.62153	5.22778	5.08995
	73.62	0.230469	0.313373	1.29102	1.34428	2.83714	2.62348	5.53174	5.09292
	73.72	0.189941	0.313971	1.45215	1.34539	2.77321	2.62543	4.99194	5.09588
	73.82	0.334473	0.314568	1.54956	1.34651	2.99195	2.62737	5.32227	5.09884
	73.92	0.393799	0.315166	1.66284	1.34762	3.02929	2.62932	5.58789	5.10179
	74.02	0.303955	0.315763	1.56372	1.34874	2.84644	2.63126	5.67773	5.10475
	74.12	0.596436	0.31636	1.48267	1.34985	2.80515	2.63321	5.31616	5.1077
	74.22	0.213379	0.316958	1.17383	1.35097	2.88161	2.63515	5.39648	5.11065
	74.32	0.147705	0.317555	1.59399	1.35208	2.77296	2.63709	5.18555	5.1136
	74.42	0.175293	0.318152	1.38721	1.3532	2.74269	2.63903	5.36768	5.11655
	74.52	0.352295	0.318749	1.57056	1.35431	3.15428	2.64098	5.49243	5.11949
	74.62	-0.03125	0.319346	1.3645	1.35543	2.93237	2.64292	5.22534	5.12243
	74.72	0.144775	0.319943	1.23022	1.35654	2.6294	2.64485	5.17065	5.12537
	74.82	0.35791	0.32054	1.51685	1.35765	2.98559	2.64679	5.51294	5.12831
	74.92	0.30957	0.321137	1.18872	1.35877	3.0857	2.64873	5.11841	5.13124
	75.02	0.141602	0.321734	1.62378	1.35988	3.1748	2.65067	5.52075	5.13418
	75.12	0.197754	0.32233	1.4292	1.36099	2.94725	2.65261	5.37378	5.13711
	75.22	0.258545	0.322927	1.04028	1.36211	2.71218	2.65454	5.30273	5.14004
	75.32	0.214355	0.323524	1.36694	1.36322	2.69826	2.65648	5.21216	5.14296
	75.42	0.435303	0.32412	1.42163	1.36433	2.96605	2.65841	5.44897	5.14589
	75.52	0.389893	0.324717	1.41284	1.36544	2.75197	2.66034	5.27686	5.14881
	75.62	-0.0490723	0.325313	1.2146	1.36656	2.72878	2.66228	5.09888	5.15173
	75.72	0.311035	0.32591	1.58252	1.36767	2.99119	2.66421	5.47852	5.15465
	75.82	0.1604	0.326506	1.34497	1.36878	2.64673	2.66614	5.19727	5.15756
	75.92	0.238525	0.327102	1.46997	1.36989	2.84742	2.66807	5.22241	5.16048
	76.02	0.306396	0.327698	1.50586	1.371	3.00683	2.67	5.42383	5.16339
	76.12	-0.0803223	0.328295	1.04102	1.37211	2.46681	2.67193	5.14331	5.1663
	76.22	0.0805664	0.328891	1.5083	1.37323	2.78636	2.67386	5.4917	5.1692
	76.32	0.333008	0.329487	1.50659	1.37434	2.89745	2.67579	5.43481	5.17211
	76.42	0.246094	0.330083	1.19653	1.37545	3.00513	2.67772	5.35034	5.17501
	76.52	0.304199	0.330679	1.28735	1.37656	3.02563	2.67964	5.51782	5.17791
	76.62	0.344482	0.331275	1.44873	1.37767	2.77856	2.68157	5.23242	5.18081
	76.72	0.00854	0.331871	1.38477	1.37878	2.41065	2.68349	5.18481	5.18371
	76.82	-0.029541	0.332466	1.18311	1.37989	2.67702	2.68542	5.23706	5.1866
	76.92	0.533691	0.333062	1.69409	1.381	3.02856	2.68734	5.47534	5.18949
	77.02	0.256348	0.333658	1.3833	1.3821	3.03247	2.68926	5.70581	5.19238
	77.12	0.143311	0.334253	1.13721	1.38321	2.59667	2.69119	5.32715	5.19527
	77.22	0.286133	0.334849	1.54199	1.38432	2.64503	2.69311	5.0708	5.19815
	77.32	0.282227	0.335445	1.52954	1.38543	2.9951	2.69503	5.45996	5.20104
	77.42	0.224365	0.33604	1.09497	1.38654	2.57399	2.69695	5.33496	5.20392
	77.52	0.344727	0.336636	1.4646	1.38765	2.68187	2.69887	5.44189	5.2068
	77.62	0.30249	0.337231	1.3418	1.38876	2.96287	2.70079	5.74634	5.20967
	77.72	0.19165	0.337826	1.10132	1.38986	2.63259	2.70271	5.3645	5.21255
	77.82	0.133789	0.338421	1.19507	1.39097	2.74414	2.70462	5.04492	5.21542
	77.92	0.136963	0.339017	1.35278	1.39208	2.82472	2.70654	5.44653	5.21829
	78.02	0.243164	0.339612	1.29736	1.39319	2.56933	2.70846	5.57324	5.22116
	78.12	0.118896	0.340207	1.54321	1.39429	2.56373	2.71037	5.29956	5.22403
	78.22	0.260254	0.340802	1.72998	1.3954	2.89428	2.71228	5.44409	5.22689
	78.32	0.599365	0.341397	1.47852	1.39651	2.93409	2.7142	5.24658	5.22975
	78.42	0.463379	0.341992	1.68408	1.39761	2.88403	2.71611	5.4043	5.23261
	78.52	0.450195	0.342587	1.73877	1.39872	2.79883	2.71802	5.52539	5.23547
	78.62	0.413574	0.343181	1.34351	1.39982	2.94188	2.71994	5.50586	5.23833
	78.72	0.160889	0.343776	1.59497	1.40093	2.64503	2.72185	5.22534	5.24118
	78.82	0.309326	0.344371	1.65967	1.40204	3.08715	2.72376	5.54565	5.24403
	78.92	0.104004	0.344965	1.48633	1.40314	2.74048	2.72567	5.42944	5.24688
	79.02	0.188477	0.34556	1.34985	1.40425	2.99267	2.72757	5.61377	5.24973
	79.12	0.265625	0.346155	1.48706	1.40535	2.69336	2.72948	5.29248	5.25257
	79.22	-0.124023	0.346749	1.56372	1.40646	2.70532	2.73139	5.44189	5.25542
	79.32	0.334473	0.347343	1.51074	1.40756	2.92015	2.7333	5.55981	5.25826
	79.42	0.122803	0.347938	1.22778	1.40866	3.01929	2.7352	5.49048	5.26109
	79.52	0.131592	0.348532	1.22485	1.40977	2.81152	2.73711	5.44507	5.26393
	79.62	0.0195313	0.349126	0.939453	1.41087	2.64723	2.73901	5.23486	5.26677
	79.72	0.303223	0.349721	1.25757	1.41198	2.82469	2.74092	5.41919	5.2696
	79.82	0.0852051	0.350315	1.37231	1.41308	2.71068	2.74282	5.24414	5.27243
	79.92	-0.0771484	0.350909	1.39648	1.41418	2.58033	2.74472	5.24902	5.27526
	80.02	0.118896	0.351503	1.4668	1.41529	2.80907	2.74662	5.58325	5.27808
	80.12	0.343018	0.352097	1.38794	1.41639	2.94872	2.74852	5.45337	5.28091
	80.22	0.0368652	0.352691	1.21387	1.41749	2.88649	2.75042	5.26147	5.28373
	80.32	0.0524902	0.353285	1.44897	1.41859	3.13256	2.75232	5.35205	5.28655
	80.42	0.19458	0.353878	1.00024	1.4197	2.63868	2.75422	5.32544	5.28937
	80.52	0.256592	0.354472	1.54272	1.4208	2.83568	2.75612	5.37231	5.29218
	80.62	0.27124	0.355066	1.36841	1.4219	2.94823	2.75802	5.52002	5.29499
	80.72	0.304199	0.35566	1.39893	1.423	2.78492	2.75992	5.26611	5.29781
	80.82	0.146973	0.356253	1.32935	1.4241	3.23242	2.76181	5.7019	5.30062
	80.92	0.137695	0.356847	1.06299	1.4252	2.6194	2.76371	5.33423	5.30342
	81.02	0.378418	0.35744	1.50513	1.42631	2.95922	2.7656	5.24341	5.30623
	81.12	0.230713	0.358034	1.21924	1.42741	2.65746	2.7675	5.42773	5.30903
	81.22	0.0673828	0.358627	1.25439	1.42851	2.7505	2.76939	5.11279	5.31183
	81.32	0.182861	0.35922	1.2207	1.42961	2.72778	2.77128	5.39258	5.31463
	81.42	0.164307	0.359814	1.15601	1.43071	2.71608	2.77317	5.21216	5.31743
	81.52	0.208008	0.360407	1.42627	1.43181	3.11546	2.77506	5.47778	5.32022
	81.62	0.366455	0.361	1.24585	1.43291	2.74975	2.77695	5.4707	5.32301
	81.72	0.392334	0.361593	1.22534	1.43401	2.89502	2.77884	5.49341	5.32581
	81.82	0.12915	0.362186	1.05591	1.43511	2.59595	2.78073	5.11621	5.32859
	81.92	0.165039	0.362779	1.01685	1.4362	2.60989	2.78262	5.19043	5.33138
	82.02	0.543213	0.363372	1.41528	1.4373	3.16623	2.78451	5.85522	5.33417
	82.12	0.297852	0.363965	1.3645	1.4384	2.77319	2.7864	5.30273	5.33695
	82.22	-0.043457	0.364558	1.47168	1.4395	2.82569	2.78828	5.40674	5.33973
	82.32	0.0705566	0.36515	1.33325	1.4406	2.94359	2.79017	5.36157	5.34251
	82.42	-0.0600586	0.365743	1.04419	1.4417	2.51223	2.79205	5.0332	5.34528
	82.52	0.137695	0.366336	1.19336	1.4428	2.7175	2.79394	5.44409	5.34806
	82.62	0.142334	0.366928	1.49634	1.44389	3.12376	2.79582	5.69946	5.35083
	82.72	-0.0395508	0.367521	1.25122	1.44499	2.82326	2.7977	5.58569	5.3536
	82.82	0.537842	0.368113	1.48096	1.44609	2.89282	2.79958	5.77002	5.35637
	82.92	0.726807	0.368706	1.63257	1.44719	3.11448	2.80147	5.71143	5.35913
	83.02	0.237549	0.369298	1.37451	1.44828	3.03469	2.80335	5.44019	5.3619
	83.12	0.32666	0.369891	1.66675	1.44938	3.34496	2.80523	5.61523	5.36466
	83.22	0.252441	0.370483	1.2832	1.45048	3.0425	2.80711	5.40649	5.36742
	83.32	0.525146	0.371075	1.31836	1.45157	2.92553	2.80898	5.57397	5.37017
	83.42	0.286865	0.371667	1.31299	1.45267	2.93408	2.81086	5.25659	5.37293
	83.52	0.356445	0.372259	1.48096	1.45376	2.92407	2.81274	5.64893	5.37568
	83.62	0.426025	0.372851	1.64575	1.45486	3.26853	2.81462	5.53491	5.37843
	83.72	0.25415	0.373443	1.34741	1.45596	2.71291	2.81649	5.52002	5.38118
	83.82	0.547119	0.374035	1.77002	1.45705	3.22484	2.81837	5.73169	5.38393
	83.92	0.297852	0.374627	1.55444	1.45815	3.24976	2.82024	5.45679	5.38668
	84.02	0.645264	0.375219	1.67773	1.45924	3.06298	2.82211	5.71436	5.38942
	84.12	0.499512	0.375811	1.62939	1.46033	3.11767	2.82399	5.52246	5.39216
	84.22	0.476807	0.376403	1.47778	1.46143	3.0044	2.82586	5.43579	5.3949
	84.32	0.502441	0.376994	1.45605	1.46252	3.19433	2.82773	5.34033	5.39764
	84.42	0.338379	0.377586	1.56689	1.46362	2.7107	2.8296	5.50659	5.40037
	84.52	0.37207	0.378177	1.50586	1.46471	2.85375	2.83147	5.82471	5.40311
	84.62	0.0664063	0.378769	1.50342	1.46581	2.86207	2.83334	5.61841	5.40584
	84.72	0.117432	0.37936	1.38965	1.4669	2.98339	2.83521	5.38257	5.40857
	84.82	0.125244	0.379952	1.08325	1.46799	2.51613	2.83708	5.18018	5.41129
	84.92	0.135254	0.380543	1.29712	1.46909	2.88551	2.83895	5.28711	5.41402
	85.02	0.161865	0.381134	1.53784	1.47018	2.85424	2.84081	5.59497	5.41674
	85.12	0.336914	0.381726	1.35669	1.47127	3.03173	2.84268	5.69019	5.41946
	85.22	0.172119	0.382317	1.25586	1.47236	2.82251	2.84454	5.49976	5.42218
	85.32	0.478271	0.382908	1.71533	1.47346	3.00683	2.84641	5.86987	5.4249
	85.42	0.15625	0.383499	1.53247	1.47455	2.97922	2.84827	5.53174	5.42761
	85.52	0.0837402	0.38409	1.28564	1.47564	2.77102	2.85014	5.68262	5.43033
	85.62	0.556396	0.384681	1.75903	1.47673	2.96142	2.852	5.33325	5.43304
	85.72	0.417236	0.385272	1.69263	1.47782	2.89722	2.85386	5.73096	5.43575
	85.82	0.324463	0.385863	0.947266	1.47891	2.80128	2.85572	5.45508	5.43845
	85.92	0.313477	0.386453	1.32935	1.48	2.80737	2.85758	5.65967	5.44116
	86.02	0.54541	0.387044	1.26221	1.4811	2.90284	2.85944	5.4646	5.44386
	86.12	0.526611	0.387635	1.77002	1.48219	3.19409	2.8613	5.92627	5.44656
	86.22	0.509521	0.388226	1.64111	1.48328	3.00904	2.86316	5.73706	5.44926
	86.32	0.657227	0.388816	1.72388	1.48437	2.9912	2.86502	5.86694	5.45196
	86.42	0.351074	0.389407	1.59277	1.48546	2.91919	2.86687	5.73169	5.45465
	86.52	0.239258	0.389997	1.18481	1.48655	2.87305	2.86873	5.39819	5.45734
	86.62	0.283691	0.390587	1.39893	1.48764	3.08251	2.87058	5.60132	5.46003
	86.72	0.335938	0.391178	1.46289	1.48873	2.81446	2.87244	5.39575	5.46272
	86.82	0.433838	0.391768	1.64893	1.48981	2.94505	2.87429	5.55664	5.46541
	86.92	0.180664	0.392358	1.33545	1.4909	2.9568	2.87615	5.50342	5.4681
	87.02	0.235352	0.392949	1.5896	1.49199	2.74437	2.878	5.38892	5.47078
	87.12	0.353271	0.393539	1.48169	1.49308	2.99119	2.87985	5.88892	5.47346
	87.22	-0.0319824	0.394129	1.13867	1.49417	2.59328	2.8817	5.56519	5.47614
	87.32	0.0986328	0.394719	1.5708	1.49526	2.94188	2.88355	5.72705	5.47881
	87.42	0.236816	0.395309	1.54346	1.49635	2.70754	2.88541	5.33936	5.48149
	87.52	0.133545	0.395899	1.79028	1.49743	3.11839	2.88725	5.80811	5.48416
	87.62	0.0595703	0.396488	1.48413	1.49852	3.11766	2.8891	5.87402	5.48683
	87.72	-0.0717773	0.397078	1.02539	1.49961	2.94338	2.89095	5.58936	5.4895
	87.82	0.33374	0.397668	1.32471	1.5007	2.70825	2.8928	5.70264	5.49217
	87.92	0.331299	0.398258	1.29028	1.50178	2.88234	2.89465	5.12524	5.49483
	88.02	0.353271	0.398847	1.31055	1.50287	3.11693	2.89649	5.75049	5.4975
	88.12	0.416504	0.399437	1.54028	1.50396	3.0364	2.89834	5.38232	5.50016
	88.22	0.481445	0.400026	1.72534	1.50504	2.90818	2.90018	5.91064	5.50282
	88.32	0.508057	0.400616	1.73169	1.50613	3.01928	2.90203	5.99878	5.50547
	88.42	0.0656738	0.401205	1.68408	1.50721	2.83253	2.90387	5.60498	5.50813
	88.52	0.339111	0.401795	1.7605	1.5083	3.03637	2.90571	5.82471	5.51078
	88.62	0.157959	0.402384	1.48804	1.50939	3.07788	2.90755	5.94434	5.51343
	88.72	0.388428	0.402973	1.48877	1.51047	2.93653	2.90939	5.77612	5.51608
	88.82	0.361816	0.403562	1.44263	1.51156	3.04735	2.91123	5.85034	5.51873
	88.92	0.335205	0.404152	1.39014	1.51264	2.7849	2.91307	5.6167	5.52137
	89.02	-0.0825195	0.404741	1.2832	1.51373	2.63575	2.91491	5.38965	5.52402
	89.12	0.482178	0.40533	1.7146	1.51481	3.10132	2.91675	5.88501	5.52666
	89.22	0.514893	0.405919	1.63086	1.5159	2.96143	2.91859	5.59961	5.5293
	89.32	0.297607	0.406508	1.28784	1.51698	2.84327	2.92043	5.50732	5.53194
	89.42	0.400879	0.407097	1.54419	1.51806	2.97388	2.92226	5.7356	5.53457
	89.52	0.431396	0.407685	1.47559	1.51915	2.94897	2.9241	5.66138	5.5372
	89.62	0.270508	0.408274	1.42163	1.52023	2.95363	2.92593	5.76392	5.53984
	89.72	0.714844	0.408863	1.58325	1.52131	3.21044	2.92777	5.78638	5.54247
	89.82	0.423584	0.409451	1.41064	1.5224	3.19044	2.9296	5.79272	5.54509
	89.92	0.459717	0.41004	1.8772	1.52348	3.28735	2.93144	5.95288	5.54772
	90.02	0.475342	0.410629	1.52783	1.52456	3.35132	2.93327	5.69263	5.55034
	90.12	0.421387	0.411217	1.29028	1.52565	2.88575	2.9351	5.65918	5.55296
	90.22	0.264893	0.411806	1.6731	1.52673	3.04101	2.93693	5.81763	5.55558
	90.32	0.24707	0.412394	1.49121	1.52781	2.90138	2.93876	5.7959	5.5582
	90.42	0.463379	0.412982	1.79492	1.52889	3.02074	2.94059	5.8396	5.56082
	90.52	0.498779	0.413571	1.4021	1.52997	3.2107	2.94242	5.50513	5.56343
	90.62	0.586914	0.414159	1.60742	1.53106	3.38109	2.94425	5.84668	5.56604
	90.72	0.468262	0.414747	1.71924	1.53214	3.2654	2.94607	5.73169	5.56865
	90.82	0.498535	0.415335	1.61133	1.53322	3.35887	2.9479	5.73071	5.57126
	90.92	0.464111	0.415923	1.3894	1.5343	3.0613	2.94973	5.42139	5.57387
	91.02	0.554932	0.416511	1.58569	1.53538	3.11692	2.95155	5.948	5.57647
	91.12	0.322754	0.417099	1.36133	1.53646	2.9231	2.95338	5.49097	5.57907
	91.22	0.0908203	0.417687	1.54663	1.53754	3.10058	2.9552	5.85986	5.58168
	91.32	0.377441	0.418275	1.52148	1.53862	2.85426	2.95703	5.33789	5.58427
	91.42	0.344727	0.418862	1.37158	1.5397	3.09425	2.95885	5.63403	5.58687
	91.52	0.583008	0.41945	1.5332	1.54078	3.13402	2.96067	5.84961	5.58947
	91.62	0.487549	0.420038	1.4082	1.54186	2.6355	2.96249	5.64966	5.59206
	91.72	0.443115	0.420626	1.41846	1.54294	3.07397	2.96431	5.90063	5.59465
	91.82	0.364258	0.421213	1.6394	1.54402	3.13478	2.96613	5.74976	5.59724
	91.92	0.486084	0.421801	1.77637	1.5451	3.40989	2.96795	5.89355	5.59982
	92.02	0.23999	0.422388	1.27393	1.54618	2.96389	2.96977	5.76221	5.60241
	92.12	0.436035	0.422975	1.67065	1.54725	2.94019	2.97159	5.83789	5.60499
	92.22	0.372803	0.423563	1.65283	1.54833	3.23095	2.97341	5.8772	5.60757
	92.32	0.15625	0.42415	1.78467	1.54941	3.24167	2.97522	5.69482	5.61015
	92.42	-0.172363	0.424737	1.09814	1.55049	2.77321	2.97704	5.41846	5.61273
	92.52	0.140869	0.425324	1.55981	1.55157	2.98802	2.97886	5.64746	5.61531
	92.62	0.0893555	0.425912	1.37549	1.55264	2.79127	2.98067	5.76855	5.61788
	92.72	0.525146	0.426499	1.47925	1.55372	3.22777	2.98248	5.66528	5.62045
	92.82	0.128174	0.427086	1.3645	1.5548	2.68947	2.9843	5.13721	5.62302
	92.92	0.387695	0.427673	1.48413	1.55588	2.97557	2.98611	5.46851	5.62559
	93.02	0.157959	0.42826	1.50122	1.55695	2.8091	2.98792	5.39502	5.62815
	93.12	0.365723	0.428846	1.31372	1.55803	2.9287	2.98973	5.68018	5.63072
	93.22	-0.129395	0.429433	1.28564	1.55911	2.69508	2.99154	5.29663	5.63328
	93.32	0.277588	0.43002	1.43164	1.56018	3.01	2.99335	5.70288	5.63584
	93.42	0.151123	0.430607	1.2395	1.56126	2.99121	2.99516	5.71606	5.6384
	93.52	0.119629	0.431193	1.28564	1.56233	2.88574	2.99697	5.48022	5.64095
	93.62	0.258789	0.43178	1.44971	1.56341	2.84962	2.99878	5.48242	5.64351
	93.72	0.431396	0.432366	1.68555	1.56448	3.08006	3.00059	5.75195	5.64606
	93.82	0.34082	0.432953	1.54419	1.56556	2.93189	3.00239	5.67871	5.64861
	93.92	0.306396	0.433539	1.57861	1.56663	3.14257	3.0042	6.0542	5.65116
	94.02	-0.0022	0.434126	1.63867	1.56771	3.15992	3.00601	5.72852	5.65371
	94.12	0.173584	0.434712	1.56665	1.56878	2.98559	3.00781	5.83716	5.65625
	94.22	0.318115	0.435298	1.27173	1.56986	2.83741	3.00961	5.6936	5.6588
	94.32	0.409424	0.435884	1.70508	1.57093	3.30982	3.01142	5.66455	5.66134
	94.42	0.297119	0.43647	1.69043	1.57201	3.01392	3.01322	5.95508	5.66388
	94.52	0.479736	0.437057	1.62134	1.57308	3.11206	3.01502	6.07373	5.66641
	94.62	0.515625	0.437643	1.74561	1.57415	3.3496	3.01682	5.77368	5.66895
	94.72	0.20874	0.438229	1.49805	1.57523	3.06934	3.01862	5.78711	5.67148
	94.82	0.14624	0.438814	1.47852	1.5763	3.0918	3.02042	5.74951	5.67401
	94.92	0.192383	0.4394	1.32153	1.57737	3.17945	3.02222	5.65845	5.67654
	95.02	0.108887	0.439986	1.40747	1.57845	2.8435	3.02402	5.68652	5.67907
	95.12	0.432129	0.440572	1.77295	1.57952	3.34422	3.02582	5.8418	5.6816
	95.22	0.348633	0.441158	1.64258	1.58059	3.02394	3.02762	5.71143	5.68412
	95.32	0.351074	0.441743	1.23877	1.58166	3.08644	3.02941	5.54272	5.68664
	95.42	0.493896	0.442329	1.66211	1.58273	3.37864	3.03121	5.81616	5.68917
	95.52	0.267334	0.442915	1.44653	1.58381	3.06521	3.033	5.5979	5.69168
	95.62	0.332764	0.4435	1.61987	1.58488	3.07766	3.0348	5.64331	5.6942
	95.72	0.694824	0.444085	1.8623	1.58595	3.53342	3.03659	6.08423	5.69672
	95.82	0.334473	0.444671	1.60742	1.58702	3.0293	3.03839	5.67212	5.69923
	95.92	0.207275	0.445256	1.41919	1.58809	3.10278	3.04018	5.88721	5.70174
	96.02	0.000244	0.445841	1.28955	1.58916	3.22559	3.04197	5.677	5.70425
	96.12	0.286865	0.446427	1.66211	1.59023	2.97999	3.04376	5.57837	5.70676
	96.22	0.169678	0.447012	1.59033	1.5913	3.04736	3.04555	5.70117	5.70926
	96.32	0.470459	0.447597	1.60669	1.59237	3.41137	3.04734	6.00122	5.71177
	96.42	0.450195	0.448182	1.53711	1.59344	3.11913	3.04913	5.68335	5.71427
	96.52	0.334473	0.448767	1.46606	1.59451	3.16773	3.05092	5.57788	5.71677
	96.62	0.169678	0.449352	1.43872	1.59558	3.5293	3.05271	5.6582	5.71927
	96.72	0.398438	0.449937	1.37061	1.59665	3.18726	3.0545	5.79419	5.72176
	96.82	0.861084	0.450522	1.90674	1.59772	3.3342	3.05628	6.09668	5.72426
	96.92	0.470459	0.451106	1.56372	1.59879	3.06982	3.05807	5.69263	5.72675
	97.02	0.205566	0.451691	1.52466	1.59986	2.85669	3.05985	5.80664	5.72924
	97.12	0.467285	0.452276	1.37939	1.60093	3.07398	3.06164	5.71777	5.73173
	97.22	0.253174	0.45286	1.57935	1.602	3.40991	3.06342	5.79883	5.73422
	97.32	0.268799	0.453445	1.71436	1.60306	3.2505	3.06521	5.71924	5.7367
	97.42	0.547119	0.45403	1.64502	1.60413	3.3137	3.06699	5.8855	5.73918
	97.52	0.43457	0.454614	1.43726	1.6052	3.04811	3.06877	5.89502	5.74167
	97.62	0.604004	0.455198	1.79736	1.60627	3.14892	3.07055	5.8623	5.74415
	97.72	0.63916	0.455783	1.86914	1.60733	3.0293	3.07233	6.07544	5.74662
	97.82	0.518799	0.456367	1.74951	1.6084	3.35424	3.07411	6.13306	5.7491
	97.92	0.361084	0.456951	1.58179	1.60947	3.33739	3.07589	5.80444	5.75157
	98.02	0.337646	0.457535	1.4043	1.61054	3.292	3.07767	5.61133	5.75405
	98.12	0.102539	0.45812	1.40527	1.6116	3.04981	3.07945	5.81372	5.75652
	98.22	0.377441	0.458704	1.45361	1.61267	3.41235	3.08123	5.78247	5.75898
	98.32	0.532959	0.459288	1.7146	1.61373	3.34668	3.083	6.0481	5.76145
	98.42	0.814941	0.459872	1.77222	1.6148	3.44116	3.08478	5.95361	5.76392
	98.52	0.370361	0.460456	1.71045	1.61587	3.51612	3.08655	5.83936	5.76638
	98.62	0.444092	0.461039	1.30908	1.61693	3.27394	3.08833	5.50513	5.76884
	98.72	0.7229	0.461623	1.51147	1.618	3.46922	3.0901	6.03809	5.7713
	98.82	0.385254	0.462207	1.89185	1.61906	3.53637	3.09188	5.97705	5.77376
	98.92	0.520508	0.462791	1.80591	1.62013	3.1543	3.09365	6.08081	5.77621
	99.02	0.70874	0.463374	1.64038	1.62119	3.23022	3.09542	5.97388	5.77867
	99.12	0.560303	0.463958	1.88013	1.62226	3.34424	3.09719	6.11304	5.78112
	99.22	0.683105	0.464541	1.87549	1.62332	3.25219	3.09896	5.96704	5.78357
	99.32	0.645508	0.465125	1.55835	1.62439	3.41234	3.10073	5.84741	5.78602
	99.42	0.23291	0.465708	1.4729	1.62545	3.18556	3.1025	5.73462	5.78846
	99.52	0.445313	0.466292	1.56372	1.62651	3.40208	3.10427	5.84326	5.79091
	99.62	0.209717	0.466875	1.2334	1.62758	2.96925	3.10604	5.59985	5.79335
	99.72	0.41748	0.467458	1.40527	1.62864	3.13182	3.10781	6.00684	5.79579
	99.82	0.513428	0.468042	1.57227	1.6297	3.03101	3.10957	5.89648	5.79823
	99.92	0.452393	0.468625	1.80981	1.63077	3.28563	3.11134	6.08179	5.80067
	100.02	0.301025	0.469208	1.47559	1.63183	2.94972	3.11311	5.57715	5.80311
	100.12	0.280518	0.469791	1.56592	1.63289	3.13721	3.11487	5.82056	5.80554
	100.22	0.530518	0.470374	1.73389	1.63395	3.40673	3.11663	5.77075	5.80797
	100.32	0.508057	0.470957	1.60596	1.63502	3.20362	3.1184	6.323	5.8104
	100.42	0.551758	0.47154	1.85815	1.63608	3.37548	3.12016	6.26758	5.81283
	100.52	0.482178	0.472123	1.83398	1.63714	3.34889	3.12192	5.6958	5.81526
	100.62	0.124268	0.472705	1.35278	1.6382	2.95679	3.12368	5.99731	5.81768
	100.72	0.23999	0.473288	1.80273	1.63926	3.14893	3.12545	5.948	5.82011
	100.82	0.419678	0.473871	1.70361	1.64032	3.29834	3.12721	5.86938	5.82253
	100.92	0.168213	0.474453	1.57617	1.64139	3.36768	3.12897	6.06934	5.82495
	101.02	0.279785	0.475036	1.50586	1.64245	3.13794	3.13072	6.07153	5.82737
	101.12	0.52124	0.475618	1.62305	1.64351	3.22853	3.13248	5.92529	5.82978
	101.22	0.612549	0.476201	1.74487	1.64457	3.54735	3.13424	6.12158	5.8322
	101.32	0.490967	0.476783	1.66528	1.64563	3.57006	3.136	6.16772	5.83461
	101.42	0.393799	0.477366	1.7019	1.64669	3.43091	3.13775	5.98096	5.83702
	101.52	0.350342	0.477948	1.60449	1.64775	3.47021	3.13951	5.99585	5.83943
	101.62	0.200195	0.47853	1.45117	1.64881	3.20971	3.14126	5.8855	5.84183
	101.72	0.318115	0.479112	1.49414	1.64987	3.43091	3.14302	5.74512	5.84424
	101.82	0.268066	0.479694	1.59888	1.65093	3.2522	3.14477	5.96143	5.84664
	101.92	0.26416	0.480276	1.59644	1.65199	3.3833	3.14653	5.89502	5.84905
	102.02	0.270508	0.480859	1.58008	1.65304	3.2793	3.14828	5.8208	5.85145
	102.12	0.282227	0.48144	1.65991	1.6541	3.13015	3.15003	5.96143	5.85384
	102.22	0.574463	0.482022	1.78101	1.65516	3.72874	3.15178	6.37231	5.85624
	102.32	0.479004	0.482604	1.67139	1.65622	3.86766	3.15353	6.34717	5.85863
	102.42	0.529785	0.483186	1.68799	1.65728	3.38647	3.15528	5.85522	5.86103
	102.52	0.497803	0.483768	1.57788	1.65834	3.25611	3.15703	5.88794	5.86342
	102.62	0.550049	0.484349	1.72144	1.65939	3.35986	3.15878	6.10962	5.86581
	102.72	0.44873	0.484931	1.77002	1.66045	3.43262	3.16053	5.91138	5.86819
	102.82	0.490723	0.485513	1.68091	1.66151	3.36205	3.16227	6.1731	5.87058
	102.92	0.282227	0.486094	1.52002	1.66257	3.21289	3.16402	5.89404	5.87296
	103.02	0.0581055	0.486676	1.45996	1.66362	3.11377	3.16577	5.75513	5.87535
	103.12	0.531494	0.487257	1.61304	1.66468	3.34106	3.16751	5.96216	5.87773
	103.22	0.334473	0.487839	1.62378	1.66574	3.13086	3.16926	5.74097	5.8801
	103.32	0.219727	0.48842	1.43164	1.66679	2.9248	3.171	5.99487	5.88248
	103.42	0.25415	0.489001	1.3208	1.66785	3.19362	3.17274	5.78101	5.88486
	103.52	0.206299	0.489582	1.53491	1.6689	3.40917	3.17449	5.86597	5.88723
	103.62	0.380615	0.490163	1.46216	1.66996	3.15359	3.17623	6.09888	5.8896
	103.72	0.733643	0.490745	1.68628	1.67102	3.65672	3.17797	6.15039	5.89197
	103.82	0.436768	0.491326	1.87622	1.67207	3.16847	3.17971	6.06909	5.89434
	103.92	0.464355	0.491907	1.55688	1.67313	3.4116	3.18145	6.15527	5.89671
	104.02	0.0478516	0.492488	1.32935	1.67418	3.11062	3.18319	5.50977	5.89907
	104.12	0.182129	0.493068	1.70972	1.67524	3.20678	3.18493	6.1333	5.90143
	104.22	0.357178	0.493649	1.72388	1.67629	3.05762	3.18667	5.75684	5.90379
	104.32	0.44458	0.49423	1.66821	1.67734	3.12378	3.1884	6.17529	5.90615
	104.42	0.519775	0.494811	1.49194	1.6784	3.19361	3.19014	5.77075	5.90851
	104.52	0.606445	0.495392	1.69189	1.67945	3.44262	3.19188	6.0271	5.91087
	104.62	0.165771	0.495972	1.35962	1.68051	3.1543	3.19361	5.79883	5.91322
	104.72	0.368164	0.496553	1.66602	1.68156	3.05835	3.19535	5.77319	5.91557
	104.82	0.475342	0.497133	1.62866	1.68261	3.04518	3.19708	6.03418	5.91792
	104.92	0.48999	0.497714	1.60742	1.68367	3.27003	3.19882	5.79272	5.92027
	105.02	0.546387	0.498294	1.66138	1.68472	3.29418	3.20055	5.83496	5.92262
	105.12	0.623535	0.498874	1.89185	1.68577	3.41208	3.20228	6.18872	5.92496
	105.22	0.602539	0.499455	1.37158	1.68683	3.09744	3.20401	5.78247	5.92731
	105.32	0.492432	0.500035	1.55664	1.68788	3.11451	3.20574	5.79663	5.92965
	105.42	0.487793	0.500615	1.65845	1.68893	3.46066	3.20748	6.15283	5.93199
	105.52	0.157227	0.501195	1.17847	1.68998	2.90994	3.2092	5.70825	5.93433
	105.62	0.363525	0.501775	1.52393	1.69103	3.25146	3.21093	5.90991	5.93666
	105.72	0.188477	0.502355	1.3186	1.69209	3.20997	3.21266	5.7998	5.939
	105.82	0.485352	0.502935	1.44971	1.69314	3.26319	3.21439	5.92163	5.94133
	105.92	0.394043	0.503515	1.23413	1.69419	3.031	3.21612	5.66992	5.94366
	106.02	0.547607	0.504095	1.51904	1.69524	3.14966	3.21784	5.77222	5.94599
	106.12	0.334473	0.504675	1.80444	1.69629	3.29274	3.21957	5.98096	5.94832
	106.22	0.603271	0.505255	1.70435	1.69734	3.63329	3.2213	6.09814	5.95065
	106.32	0.443848	0.505834	1.57227	1.69839	3.12624	3.22302	5.75659	5.95297
	106.42	0.462646	0.506414	1.81763	1.69944	3.39258	3.22474	6.1582	5.95529
	106.52	0.621338	0.506994	1.96387	1.70049	3.36865	3.22647	6.04663	5.95761
	106.62	0.403076	0.507573	1.5354	1.70154	3.2981	3.22819	5.84497	5.95993
	106.72	0.454834	0.508153	1.44189	1.70259	3.13574	3.22991	5.73267	5.96225
	106.82	0.665039	0.508732	1.57544	1.70364	3.37157	3.23163	6.01685	5.96457
	106.92	0.323486	0.509311	1.66382	1.70469	3.38648	3.23336	5.93164	5.96688
	107.02	0.331299	0.509891	1.71216	1.70574	3.56127	3.23508	5.95361	5.96919
	107.12	0.352295	0.51047	1.62622	1.70679	3.28075	3.23679	5.96216	5.9715
	107.22	0.290039	0.511049	1.41919	1.70784	3.01368	3.23851	5.84644	5.97381
	107.32	0.181396	0.511628	1.57153	1.70889	3.14576	3.24023	5.94263	5.97612
	107.42	0.446289	0.512208	1.62866	1.70993	3.20288	3.24195	6.11841	5.97843
	107.52	0.352539	0.512787	1.77954	1.71098	3.09351	3.24367	6.18188	5.98073
	107.62	0.220459	0.513366	1.50659	1.71203	2.91456	3.24538	5.97998	5.98303
	107.72	0.368896	0.513945	1.74658	1.71308	3.54515	3.2471	6.02246	5.98533
	107.82	0.267334	0.514523	1.51147	1.71412	3.26297	3.24881	5.82715	5.98763
	107.92	0.308838	0.515102	1.66309	1.71517	3.43579	3.25053	6.09497	5.98993
	108.02	0.431396	0.515681	1.5708	1.71622	3.36304	3.25224	6.2561	5.99222
	108.12	0.433105	0.51626	1.66772	1.71727	3.2981	3.25396	6.09106	5.99452
	108.22	0.467285	0.516838	1.60815	1.71831	3.03809	3.25567	5.97534	5.99681
	108.32	0.501709	0.517417	1.66455	1.71936	3.03737	3.25738	6.06616	5.9991
	108.42	0.556396	0.517996	1.63257	1.72041	3.51147	3.25909	6.16455	6.00139
	108.52	0.527344	0.518574	1.86597	1.72145	3.51368	3.2608	6.14258	6.00367
	108.62	0.585938	0.519153	1.84326	1.7225	3.22313	3.26251	6.20898	6.00596
	108.72	0.485352	0.519731	1.61694	1.72354	3.08497	3.26422	6.17627	6.00824
	108.82	0.23999	0.520309	1.71606	1.72459	3.2185	3.26593	5.83496	6.01052
	108.92	0.12915	0.520888	1.54272	1.72564	3.05201	3.26764	5.77002	6.0128
	109.02	0.308105	0.521466	1.70435	1.72668	3.15282	3.26934	6.09888	6.01508
	109.12	0.0766602	0.522044	1.30908	1.72773	2.9529	3.27105	5.76855	6.01736
	109.22	0.464844	0.522622	1.76367	1.72877	3.32151	3.27276	6.06299	6.01963
	109.32	0.340088	0.5232	1.69263	1.72981	3.3052	3.27446	6.0083	6.02191
	109.42	0.515137	0.523778	1.86157	1.73086	3.49195	3.27617	6.37158	6.02418
	109.52	0.475098	0.524356	2.23804	1.7319	3.57934	3.27787	6.23877	6.02645
	109.62	0.452393	0.524934	1.89795	1.73295	3.45042	3.27958	6.22144	6.02872
	109.72	0.29541	0.525512	1.7356	1.73399	3.17311	3.28128	6.01147	6.03098
	109.82	0.488525	0.52609	1.60986	1.73503	3.45605	3.28298	6.02783	6.03325
	109.92	0.301758	0.526668	1.60132	1.73608	3.32253	3.28468	6.05908	6.03551
	110.02	0.668213	0.527246	1.78882	1.73712	3.43186	3.28638	6.17944	6.03777
	110.12	0.681396	0.527823	1.71045	1.73816	3.48388	3.28809	6.22852	6.04003
	110.22	0.446045	0.528401	1.8269	1.73921	3.49024	3.28979	6.26367	6.04229
	110.32	0.641602	0.528978	1.79419	1.74025	3.33249	3.29148	6.09888	6.04455
	110.42	0.188477	0.529556	1.39185	1.74129	2.9497	3.29318	5.65039	6.0468
	110.52	-0.0366211	0.530133	1.38086	1.74234	2.82691	3.29488	5.83008	6.04905
	110.62	0.499512	0.530711	1.47705	1.74338	2.83497	3.29658	5.83716	6.0513
	110.72	0.344482	0.531288	1.58398	1.74442	3.17381	3.29827	5.92383	6.05355
	110.82	0.601563	0.531865	1.63159	1.74546	3.34348	3.29997	5.92456	6.0558
	110.92	0.154785	0.532443	1.45337	1.7465	3.11597	3.30167	5.86206	6.05805
	111.02	0.381348	0.53302	1.49561	1.74754	3.11841	3.30336	5.91211	6.06029
	111.12	0.643066	0.533597	1.68555	1.74858	3.14331	3.30506	5.93481	6.06254
	111.22	0.301025	0.534174	1.67163	1.74963	3.17163	3.30675	5.97852	6.06478
	111.32	0.353271	0.534751	1.56055	1.75067	3.22069	3.30844	5.76685	6.06702
	111.42	0.307861	0.535328	1.58789	1.75171	3.22462	3.31013	5.95654	6.06925
	111.52	0.264893	0.535905	1.99414	1.75275	3.30273	3.31183	6.18555	6.07149
	111.62	0.43457	0.536482	1.83252	1.75379	3.22927	3.31352	6.073	6.07373
	111.72	0.726074	0.537058	2.2998	1.75483	3.7905	3.31521	6.32324	6.07596
	111.82	0.426758	0.537635	1.69336	1.75587	3.38256	3.3169	5.77246	6.07819
	111.92	0.279053	0.538212	1.82007	1.75691	3.46143	3.31859	5.94653	6.08042
	112.02	0.500244	0.538789	1.75757	1.75795	3.20678	3.32027	6.07471	6.08265
	112.12	0.741699	0.539365	1.84106	1.75899	3.38255	3.32196	6.2373	6.08487
	112.22	0.291504	0.539942	1.35913	1.76002	3.11916	3.32365	5.73169	6.0871
	112.32	0.11499	0.540518	1.6167	1.76106	3.28712	3.32534	5.7832	6.08932
	112.42	0.393799	0.541095	1.69971	1.7621	3.27147	3.32702	5.76758	6.09154
	112.52	0.472168	0.541671	1.45996	1.76314	3.15358	3.32871	6.00122	6.09376
	112.62	0.594727	0.542247	1.66675	1.76418	3.35278	3.33039	6.1582	6.09598
	112.72	0.429688	0.542824	1.37695	1.76522	3.29102	3.33208	5.77075	6.0982
	112.82	0.562012	0.5434	1.48242	1.76625	3.16921	3.33376	6.05664	6.10041
	112.92	0.627441	0.543976	1.80273	1.76729	3.46069	3.33544	6.29346	6.10263
	113.02	0.565674	0.544552	1.63257	1.76833	3.26368	3.33713	6.3645	6.10484
	113.12	0.379883	0.545128	1.55664	1.76937	3.13551	3.33881	6.01685	6.10705
	113.22	0.603271	0.545704	1.74268	1.7704	3.20677	3.34049	6.06763	6.10926
	113.32	0.563477	0.54628	1.68335	1.77144	3.57935	3.34217	6.24731	6.11146
	113.42	0.755615	0.546856	1.89746	1.77248	3.77245	3.34385	6.24341	6.11367
	113.52	0.495605	0.547432	1.88184	1.77351	3.49903	3.34553	6.20215	6.11587
	113.62	0.439209	0.548007	1.4082	1.77455	3.17799	3.34721	5.98169	6.11807
	113.72	0.531982	0.548583	1.62695	1.77559	3.30516	3.34888	6.12451	6.12027
	113.82	0.321289	0.549159	1.5896	1.77662	3.39038	3.35056	5.9834	6.12247
	113.92	0.374512	0.549735	1.82788	1.77766	3.53247	3.35224	5.99976	6.12467
	114.02	0.476563	0.55031	1.58081	1.77869	3.20362	3.35391	5.9458	6.12686
	114.12	0.357178	0.550886	1.74487	1.77973	3.20215	3.35559	6.05518	6.12906
	114.22	0.396973	0.551461	1.75757	1.78076	3.37231	3.35726	6.03491	6.13125
	114.32	0.341553	0.552036	1.81055	1.7818	3.40429	3.35894	5.96436	6.13344
	114.42	0.304932	0.552612	1.37158	1.78283	3.00049	3.36061	6.03101	6.13563
	114.52	0.19873	0.553187	1.69751	1.78387	3.12402	3.36228	6.15137	6.13781
	114.62	0.143311	0.553762	1.63965	1.7849	2.94754	3.36396	5.90918	6.14
	114.72	0.288574	0.554338	2.07544	1.78594	3.38034	3.36563	6.38184	6.14218
	114.82	0.144531	0.554913	1.52686	1.78697	3.06056	3.3673	5.88403	6.14437
	114.92	0.19873	0.555488	1.83252	1.78801	3.58642	3.36897	6.20435	6.14655
	115.02	0.119629	0.556063	1.77856	1.78904	3.42701	3.37064	5.97388	6.14872
	115.12	0.383789	0.556638	1.68652	1.79007	3.29198	3.37231	5.65918	6.1509
	115.22	0.0500488	0.557213	1.48242	1.79111	3.0442	3.37398	5.80518	6.15308
	115.32	0.368896	0.557788	1.79565	1.79214	3.43629	3.37565	5.99561	6.15525
	115.42	0.506348	0.558363	1.74976	1.79317	3.5459	3.37731	6.08569	6.15742
	115.52	0.828125	0.558937	2.08789	1.7942	3.76758	3.37898	6.28564	6.1596
	115.62	0.919678	0.559512	2.08643	1.79524	3.93965	3.38065	6.54028	6.16176
	115.72	0.351807	0.560087	1.57617	1.79627	3.30913	3.38231	5.87769	6.16393
	115.82	0.67041	0.560661	1.88013	1.7973	3.04419	3.38398	6.18408	6.1661
	115.92	0.471191	0.561236	1.59033	1.79833	3.32006	3.38564	6.11133	6.16826
	116.02	0.436035	0.56181	1.28003	1.79936	3.01686	3.3873	5.89648	6.17043
	116.12	0.636719	0.562385	1.73779	1.8004	3.29346	3.38897	6.24634	6.17259
	116.22	0.503418	0.562959	1.76611	1.80143	3.45214	3.39063	6.53491	6.17475
	116.32	0.378174	0.563533	1.70898	1.80246	3.58251	3.39229	6.2168	6.1769
	116.42	0.175293	0.564108	1.59497	1.80349	3.12329	3.39395	5.94751	6.17906
	116.52	0.543213	0.564682	1.69336	1.80452	3.37866	3.39561	5.97705	6.18122
	116.62	0.657227	0.565256	2.0271	1.80555	3.66381	3.39727	6.28418	6.18337
	116.72	0.522705	0.56583	1.77075	1.80658	3.40748	3.39893	6.35815	6.18552
	116.82	0.49707	0.566404	1.87378	1.80761	3.45898	3.40059	6.18555	6.18767
	116.92	0.52124	0.566978	1.79102	1.80864	3.54027	3.40225	6.0896	6.18982
	117.02	0.343018	0.567552	1.62158	1.80967	3.36915	3.40391	6.23804	6.19196
	117.12	0.294678	0.568126	1.56299	1.8107	3.5459	3.40556	6.11914	6.19411
	117.22	0.250732	0.5687	1.71899	1.81173	3.43701	3.40722	5.97681	6.19625
	117.32	0.765137	0.569274	1.97485	1.81276	3.48338	3.40888	6.19189	6.1984
	117.42	0.271973	0.569848	1.43872	1.81379	3.35353	3.41053	5.94019	6.20054
	117.52	0.456543	0.570422	1.75757	1.81482	3.44652	3.41218	6.16919	6.20267
	117.62	0.13208	0.570995	1.8269	1.81585	3.52465	3.41384	5.9104	6.20481
	117.72	0.017334	0.571569	1.52539	1.81687	3.24195	3.41549	6.03882	6.20695
	117.82	0.35083	0.572142	1.86523	1.8179	3.43091	3.41714	6.33789	6.20908
	117.92	0.698486	0.572716	1.99097	1.81893	3.59252	3.4188	6.29321	6.21121
	118.02	0.440918	0.573289	1.79663	1.81996	3.33253	3.42045	6.22876	6.21335
	118.12	0.734375	0.573863	1.79492	1.82099	3.52219	3.4221	6.25269	6.21547
	118.22	0.268799	0.574436	1.49878	1.82201	3.06375	3.42375	6.16919	6.2176
	118.32	0.471924	0.575009	1.85498	1.82304	3.54418	3.4254	6.33936	6.21973
	118.42	0.446289	0.575582	1.87061	1.82407	3.44508	3.42705	6.28247	6.22185
	118.52	0.839111	0.576156	2.24097	1.8251	3.60057	3.42869	6.20679	6.22398
	118.62	0.587646	0.576729	2.05591	1.82612	3.69262	3.43034	6.47925	6.2261
	118.72	0.400879	0.577302	1.81055	1.82715	3.46608	3.43199	6.0896	6.22822
	118.82	0.398438	0.577875	1.85278	1.82817	3.83008	3.43364	6.4668	6.23034
	118.92	0.748535	0.578448	2.06445	1.8292	3.64427	3.43528	6.35596	6.23245
	119.02	0.212646	0.579021	1.72925	1.83023	3.45974	3.43693	6.00049	6.23457
	119.12	0.383789	0.579593	1.75586	1.83125	3.72387	3.43857	6.11841	6.23668
	119.22	0.447754	0.580166	1.57007	1.83228	3.7256	3.44022	6.30981	6.23879
	119.32	0.734375	0.580739	1.8855	1.8333	3.71362	3.44186	6.36597	6.2409
	119.42	0.748535	0.581312	1.93726	1.83433	3.406	3.4435	6.30444	6.24301
	119.52	0.617432	0.581884	2.11768	1.83535	3.49195	3.44514	6.21606	6.24512
	119.62	0.636719	0.582457	2.07935	1.83638	3.78173	3.44679	6.4519	6.24722
	119.72	0.504883	0.583029	1.74341	1.8374	3.55372	3.44843	6.02173	6.24933
	119.82	0.467529	0.583602	2.13403	1.83843	3.68653	3.45007	6.46997	6.25143
	119.92	1.05493	0.584174	2.18408	1.83945	4.0239	3.45171	6.62378	6.25353
	120.02	0.433838	0.725974	1.60132	1.37545	3.54421	2.47631	6.33325	4.06253
	120.12	0.619873	0.725974	2.03882	1.37545	3.7224	2.47631	6.16699	4.06253
	120.22	0.768799	0.725974	0.805176	1.37545	5.13087	2.47631	6.33252	4.06253
	120.32	-1.2373	0.725974	-1.20508	1.37545	-2.64394	2.47631	3.31616	4.06253
	120.42	0.900146	0.725974	2.54272	1.37545	4.50921	2.47631	3.12012	4.06253
	120.52	0.364258	0.725974	0.838867	1.37545	2.92097	2.47631	6.19897	4.06253
	120.62	0.0344238	0.725974	0.860596	1.37545	2.65578	2.47631	5.2644	4.06253
	120.72	0.275146	0.725974	1.03711	1.37545	2.83787	2.47631	4.96362	4.06253
	120.82	-0.0905762	0.725974	0.902588	1.37545	2.50196	2.47631	4.57056	4.06253
	120.92	0.123535	0.725974	0.699707	1.37545	2.76537	2.47631	4.42383	4.06253
	121.02	-0.0461426	0.725974	0.935547	1.37545	2.49269	2.47631	4.24951	4.06253
	121.12	-0.163086	0.725974	0.917725	1.37545	2.64356	2.47631	4.68164	4.06253
	121.22	0.178223	0.725974	0.965332	1.37545	2.57397	2.47631	4.44263	4.06253
	121.32	0.0368652	0.725974	1.11597	1.37545	2.48241	2.47631	4.38867	4.06253
	121.42	-0.153809	0.725974	0.740234	1.37545	2.48243	2.47631	4.11304	4.06253
	121.52	0.0766602	0.725974	1.20752	1.37545	2.43725	2.47631	4.19336	4.06253
	121.62	0.097168	0.725974	0.8396	1.37545	2.45461	2.47631	4.13794	4.06253
	121.72	0.234619	0.725974	0.954346	1.37545	2.6013	2.47631	4.36694	4.06253
	121.82	0.0368652	0.725974	0.717529	1.37545	2.40284	2.47631	4.34326	4.06253
	121.92	0.160889	0.725974	1.04883	1.37545	2.57227	2.47631	4.46753	4.06253
	122.02	0.00732	0.725974	1.00122	1.37545	2.48657	2.47631	4.51074	4.06253
	122.12	0.199463	0.725974	1.04883	1.37545	2.49022	2.47631	4.45508	4.06253
	122.22	-0.237305	0.725974	0.947266	1.37545	2.19045	2.47631	4.29492	4.06253
	122.32	0.242432	0.725974	1.25195	1.37545	2.63499	2.47631	4.44263	4.06253
	122.42	-0.150635	0.725974	1.13794	1.37545	2.20362	2.47631	4.09668	4.06253
	122.52	-0.0373535	0.725974	1.19165	1.37545	2.42626	2.47631	4.33154	4.06253
	122.62	0.248535	0.725974	1.05347	1.37545	2.54176	2.47631	4.14648	4.06253
	122.72	0.0617676	0.725974	0.987793	1.37545	2.59105	2.47631	4.63477	4.06253
	122.82	0.150146	0.725974	1.19971	1.37545	2.74659	2.47631	4.52002	4.06253
	122.92	0.294678	0.725974	1.21362	1.37545	2.54099	2.47631	4.45825	4.06253
	123.02	-0.127197	0.725974	0.778564	1.37545	2.09109	2.47631	4.16919	4.06253
	123.12	-0.136475	0.725974	0.804443	1.37545	1.94656	2.47631	4.15356	4.06253
	123.22	0.351807	0.725974	1.10352	1.37545	2.45213	2.47631	4.14111	4.06253
	123.32	0.263428	0.725974	1.31226	1.37545	2.45506	2.47631	4.323	4.06253
	123.42	-0.0170898	0.725974	1.09814	1.37545	2.11232	2.47631	4.26685	4.06253
	123.52	0.357178	0.725974	0.822266	1.37545	2.57763	2.47631	4.36353	4.06253
	123.62	0.224365	0.725974	1.06616	1.37545	2.41527	2.47631	4.64893	4.06253
	123.72	0.0180664	0.725974	0.880127	1.37545	2.32545	2.47631	4.38403	4.06253
	123.82	-0.0537109	0.725974	0.905029	1.37545	2.38477	2.47631	4.34497	4.06253
	123.92	0.032959	0.725974	1.45117	1.37545	2.5715	2.47631	4.3208	4.06253
	124.02	-0.226318	0.725974	0.954346	1.37545	2.04275	2.47631	4.15454	4.06253
	124.12	-0.0061	0.725974	1.01465	1.37545	2.33494	2.47631	4.19434	4.06253
	124.22	-0.327148	0.725974	0.896729	1.37545	2.18972	2.47631	3.97168	4.06253
	124.32	-0.0981445	0.725974	1.14038	1.37545	2.45289	2.47631	4.29736	4.06253
	124.42	0.122803	0.725974	1.34253	1.37545	2.58082	2.47631	4.31128	4.06253
	124.52	0.306396	0.725974	1.34668	1.37545	2.33813	2.47631	4.65845	4.06253
	124.62	0.0554199	0.725974	0.776123	1.37545	2.12623	2.47631	4.02466	4.06253
	124.72	-0.117188	0.725974	1.04419	1.37545	2.38867	2.47631	4.11987	4.06253
	124.82	-0.35376	0.725974	0.908936	1.37545	2.06518	2.47631	4.08154	4.06253
	124.92	-0.303711	0.725974	0.802734	1.37545	1.99196	2.47631	4.06689	4.06253
	125.02	0.00464	0.725974	1.17847	1.37545	2.57078	2.47631	4.13477	4.06253
	125.12	-0.125488	0.725974	1.15454	1.37545	2.11475	2.47631	4.09106	4.06253
	125.22	-0.00439	0.725974	0.920166	1.37545	2.48193	2.47631	4.20679	4.06253
	125.32	-0.015625	0.725974	0.813721	1.37545	2.01759	2.47631	3.79321	4.06253
	125.42	0.111816	0.725974	1.19653	1.37545	2.40674	2.47631	4.27612	4.06253
	125.52	0.257813	0.725974	0.847168	1.37545	2.29346	2.47631	4.26758	4.06253
	125.62	0.214111	0.725974	1.27002	1.37545	2.63013	2.47631	4.23486	4.06253
	125.72	0.14917	0.725974	0.991699	1.37545	2.4043	2.47631	4.24414	4.06253
	125.82	-0.0583496	0.725974	0.783203	1.37545	2.31152	2.47631	4.18652	4.06253
	125.92	-0.0864258	0.725974	0.848877	1.37545	2.26295	2.47631	4.18872	4.06253
	126.02	0.130615	0.725974	1.25366	1.37545	2.5786	2.47631	4.43335	4.06253
	126.12	0.10791	0.725974	1.34253	1.37545	2.2998	2.47631	4.49585	4.06253
	126.22	-0.0373535	0.725974	0.944092	1.37545	2.58399	2.47631	4.02466	4.06253
	126.32	-0.138916	0.725974	0.855225	1.37545	2.41235	2.47631	3.98022	4.06253
	126.42	-0.105469	0.725974	0.961426	1.37545	2.18093	2.47631	3.99268	4.06253
	126.52	0.189209	0.725974	1.22144	1.37545	2.39646	2.47631	4.02612	4.06253
	126.62	0.0227051	0.725974	1.09399	1.37545	2.31203	2.47631	4.05737	4.06253
	126.72	0.216553	0.725974	1.38403	1.37545	2.61668	2.47631	4.38403	4.06253
	126.82	0.0744629	0.725974	0.949707	1.37545	2.19335	2.47631	4.18799	4.06253
	126.92	0.017334	0.725974	0.802734	1.37545	2.4497	2.47631	4.17773	4.06253
	127.02	-0.113281	0.725974	0.780762	1.37545	2.40601	2.47631	3.89258	4.06253
	127.12	-0.0966797	0.725974	0.788818	1.37545	2.19507	2.47631	3.88647	4.06253
	127.22	0.0581055	0.725974	0.908203	1.37545	2.07397	2.47631	4.19116	4.06253
	127.32	-0.0749512	0.725974	0.932373	1.37545	2.35743	2.47631	4.06055	4.06253
	127.42	0.151855	0.725974	0.880127	1.37545	2.42406	2.47631	3.93262	4.06253
	127.52	-0.282715	0.725974	1.09106	1.37545	2.24659	2.47631	4.25513	4.06253
	127.62	-0.267822	0.725974	0.73877	1.37545	2.04127	2.47631	3.802	4.06253
	127.72	-0.403809	0.725974	0.656006	1.37545	2.10522	2.47631	3.90039	4.06253
	127.82	-0.159912	0.725974	1.12866	1.37545	2.2544	2.47631	4.27319	4.06253
	127.92	-0.0146484	0.725974	1.19019	1.37545	2.37696	2.47631	4.10596	4.06253
	128.02	0.0578613	0.725974	0.938721	1.37545	2.32006	2.47631	4.23096	4.06253
	128.12	-0.148193	0.725974	0.95752	1.37545	2.07935	2.47631	3.96924	4.06253
	128.22	0.404785	0.725974	0.982422	1.37545	2.07935	2.47631	4.09424	4.06253
	128.32	0.159424	0.725974	0.971436	1.37545	2.55055	2.47631	4.11914	4.06253
	128.42	0.00952	0.725974	1.10596	1.37545	2.45289	2.47631	4.14185	4.06253
	128.52	0.3479	0.725974	1.17554	1.37545	2.48095	2.47631	4.18628	4.06253
	128.62	-0.101563	0.725974	1.06055	1.37545	2.72534	2.47631	3.97388	4.06253
	128.72	0.265869	0.725974	1.02173	1.37545	2.42017	2.47631	4.09204	4.06253
	128.82	-0.220947	0.725974	0.97998	1.37545	2.3716	2.47631	3.86523	4.06253
	128.92	0.168701	0.725974	1.10889	1.37545	2.25051	2.47631	4.20117	4.06253
	129.02	0.338623	0.725974	1.07935	1.37545	2.59519	2.47631	4.28809	4.06253
	129.12	0.193848	0.725974	1.10205	1.37545	2.30981	2.47631	4.11841	4.06253
	129.22	0.21582	0.725974	1.25757	1.37545	2.68335	2.47631	4.39185	4.06253
	129.32	-0.0568848	0.725974	1.04736	1.37545	2.29444	2.47631	4.03101	4.06253
	129.42	0.229004	0.725974	1.09009	1.37545	2.4224	2.47631	4.03784	4.06253
	129.52	0.0148926	0.725974	1.49878	1.37545	2.48629	2.47631	4.35425	4.06253
	129.62	0.0180664	0.725974	0.966064	1.37545	2.35376	2.47631	4.15137	4.06253
	129.72	0.154053	0.725974	0.972412	1.37545	2.38794	2.47631	4.09424	4.06253
	129.82	0.150879	0.725974	1.17627	1.37545	2.51366	2.47631	4.31055	4.06253
	129.92	-0.00293	0.725974	1.08252	1.37545	2.49898	2.47631	4.25366	4.06253
	130.02	-0.117676	0.725974	0.92627	1.37545	2.22245	2.47631	3.80762	4.06253
	130.12	0.239258	0.725974	0.935791	1.37545	2.18408	2.47631	4.18652	4.06253
	130.22	-0.0529785	0.725974	1.01221	1.37545	2.18555	2.47631	3.9458	4.06253
	130.32	0.112061	0.725974	1.33569	1.37545	2.41161	2.47631	4.21143	4.06253
	130.42	-0.0319824	0.725974	1.21509	1.37545	2.18236	2.47631	3.823	4.06253
	130.52	-0.177979	0.725974	0.661377	1.37545	2.35378	2.47631	3.95825	4.06253
	130.62	-0.172363	0.725974	0.945068	1.37545	2.22095	2.47631	3.94751	4.06253
	130.72	0.290771	0.725974	1.1272	1.37545	2.17017	2.47631	4.36694	4.06253
	130.82	0.17041	0.725974	1.24268	1.37545	2.16991	2.47631	4.24268	4.06253
	130.92	0.0251465	0.725974	0.887939	1.37545	2.27	2.47631	3.91602	4.06253
	131.02	-0.0458984	0.725974	0.745605	1.37545	2.21218	2.47631	4.05664	4.06253
	131.12	0.0869141	0.725974	1.15747	1.37545	2.25122	2.47631	4.16772	4.06253
	131.22	0.483887	0.725974	1.38794	1.37545	2.82544	2.47631	4.3833	4.06253
	131.32	-0.170166	0.725974	1.06909	1.37545	2.29203	2.47631	3.83398	4.06253
	131.42	0.0251465	0.725974	1.15039	1.37545	2.32322	2.47631	4.18652	4.06253
	131.52	0.0275879	0.725974	1.16455	1.37545	2.04055	2.47631	4.08252	4.06253
	131.62	-0.158447	0.725974	0.738037	1.37545	2.19336	2.47631	3.86206	4.06253
	131.72	0.0517578	0.725974	1.17554	1.37545	2.22241	2.47631	3.91699	4.06253
	131.82	0.0478516	0.725974	0.9646	1.37545	2.18267	2.47631	3.95825	4.06253
	131.92	0.245605	0.725974	1.37012	1.37545	2.49359	2.47631	4.07251	4.06253
	132.02	-0.0327148	0.725974	1.18872	1.37545	2.27545	2.47631	3.79346	4.06253
	132.12	0.00879	0.725974	0.976318	1.37545	2.29419	2.47631	3.61841	4.06253
	132.22	-0.1875	0.725974	0.909668	1.37545	2.02686	2.47631	3.83936	4.06253
	132.32	-0.186523	0.725974	1.16699	1.37545	2.03248	2.47631	3.85352	4.06253
	132.42	-0.0170898	0.725974	1.06616	1.37545	2.00759	2.47631	4.16138	4.06253
	132.52	-0.0231934	0.725974	1.16699	1.37545	2.44505	2.47631	4.24121	4.06253
	132.62	-0.55835	0.725974	0.651123	1.37545	1.72852	2.47631	3.43091	4.06253
	132.72	0.0163574	0.725974	1.04712	1.37545	2.38013	2.47631	4.14575	4.06253
	132.82	0.0979004	0.725974	1.19043	1.37545	2.34131	2.47631	4.19263	4.06253
	132.92	0.273682	0.725974	1.26929	1.37545	2.46239	2.47631	3.89355	4.06253
	133.02	0.314941	0.725974	0.877686	1.37545	2.36915	2.47631	3.81665	4.06253
	133.12	0.0759277	0.725974	0.916992	1.37545	2.43262	2.47631	4.09106	4.06253
	133.22	0.135986	0.725974	1.177	1.37545	2.35986	2.47631	4.1333	4.06253
	133.32	0.30542	0.725974	0.989502	1.37545	2.38622	2.47631	3.88623	4.06253
	133.42	0.0969238	0.725974	0.771484	1.37545	2.0896	2.47631	3.8606	4.06253
	133.52	0.132324	0.725974	1.06763	1.37545	2.46778	2.47631	3.82788	4.06253
	133.62	-0.0703125	0.725974	1.05737	1.37545	2.32397	2.47631	4.01611	4.06253
	133.72	-0.0437012	0.725974	0.773926	1.37545	1.98169	2.47631	3.81055	4.06253
	133.82	0.318115	0.725974	0.979492	1.37545	2.38963	2.47631	4.15991	4.06253
	133.92	0.323486	0.725974	0.927002	1.37545	2.0637	2.47631	4.03174	4.06253
	134.02	0.0227051	0.725974	0.680908	1.37545	2.09646	2.47631	3.85425	4.06253
	134.12	0.20874	0.725974	0.919189	1.37545	2.323	2.47631	4.04175	4.06253
	134.22	0.394531	0.725974	1.06836	1.37545	2.49487	2.47631	4.19019	4.06253
	134.32	0.0368652	0.725974	1.01147	1.37545	2.32785	2.47631	4.00122	4.06253
	134.42	-0.215576	0.725974	0.973145	1.37545	2.2598	2.47631	3.64111	4.06253
	134.52	0.0634766	0.725974	1.39722	1.37545	2.50046	2.47631	4.0957	4.06253
	134.62	0.193115	0.725974	1.00439	1.37545	2.2644	2.47631	3.84814	4.06253
	134.72	0.10498	0.725974	1.0083	1.37545	2.22095	2.47631	4.04736	4.06253
	134.82	0.183594	0.725974	1.00513	1.37545	2.17308	2.47631	3.94482	4.06253
	134.92	0.0493164	0.725974	0.94165	1.37545	2.28391	2.47631	3.90967	4.06253
	135.02	-0.348145	0.725974	0.78418	1.37545	2.12624	2.47631	3.55591	4.06253
	135.12	0.0510254	0.725974	1.23096	1.37545	2.23413	2.47631	4.03027	4.06253
	135.22	0.203369	0.725974	0.845703	1.37545	2.27856	2.47631	3.91772	4.06253
	135.32	0.218262	0.725974	1.2771	1.37545	2.51998	2.47631	3.97485	4.06253
	135.42	0.0563965	0.725974	0.987061	1.37545	2.03881	2.47631	4.13867	4.06253
	135.52	0.18042	0.725974	0.722168	1.37545	2.14795	2.47631	4.22998	4.06253
	135.62	0.0219727	0.725974	0.699707	1.37545	2.19019	2.47631	3.83936	4.06253
	135.72	-0.0466309	0.725974	1.02856	1.37545	2.22314	2.47631	4.01221	4.06253
	135.82	-0.100586	0.725974	0.765381	1.37545	2.07013	2.47631	3.84351	4.06253
	135.92	-0.102783	0.725974	1.14282	1.37545	2.36084	2.47631	4.22095	4.06253
	136.02	0.0322266	0.725974	1.28564	1.37545	2.68555	2.47631	4.29565	4.06253
	136.12	0.0776367	0.725974	1.07471	1.37545	2.3999	2.47631	4.08179	4.06253
	136.22	0.113281	0.725974	0.634766	1.37545	1.78247	2.47631	3.77612	4.06253
	136.32	-0.0466309	0.725974	1.16382	1.37545	2.3225	2.47631	4.03564	4.06253
	136.42	-0.166992	0.725974	0.682617	1.37545	2.22706	2.47631	4.18335	4.06253
	136.52	-0.196045	0.725974	0.766846	1.37545	2.09741	2.47631	4.02783	4.06253
	136.62	0.134521	0.725974	1.18091	1.37545	2.01367	2.47631	3.92993	4.06253
	136.72	0.108643	0.725974	1.28564	1.37545	2.79565	2.47631	4.35278	4.06253
	136.82	0.135254	0.725974	0.830811	1.37545	2.49266	2.47631	4.01831	4.06253
	136.92	-0.0512695	0.725974	0.843506	1.37545	2.22093	2.47631	4.09424	4.06253
	137.02	0.0422363	0.725974	0.794922	1.37545	1.88576	2.47631	3.99097	4.06253
	137.12	0.107178	0.725974	0.993408	1.37545	2.15039	2.47631	3.7771	4.06253
	137.22	0.0585938	0.725974	0.892578	1.37545	2.28955	2.47631	4.11597	4.06253
	137.32	0.113525	0.725974	1.18652	1.37545	2.52879	2.47631	4.22485	4.06253
	137.42	0.283691	0.725974	1.27856	1.37545	2.40992	2.47631	4.21606	4.06253
	137.52	-0.0114746	0.725974	1.05664	1.37545	2.49584	2.47631	3.93018	4.06253
	137.62	0.0744629	0.725974	1.03955	1.37545	2.40137	2.47631	3.93262	4.06253
	137.72	0.253906	0.725974	1.23633	1.37545	2.59961	2.47631	4.21753	4.06253
	137.82	-0.174805	0.725974	0.487305	1.37545	1.92701	2.47631	3.7771	4.06253
[truncated: 7,442 more rows]
