# Supplementary material for: Soluble Fas ligand drives autoantibody-induced arthritis by binding to DR5/TRAIL-R2
Source: eLife. 2021 Jul 5;10:e48840. doi: 10.7554/eLife.48840 (PMC8257255; doi:10.7554/eLife.48840)
Supplement: Figure 2—source data 1. [file elife-48840-fig2-data1.xlsx]

## Sheet: Figure 2
Figure 2B	FasL-Fc binding-PE (MFI)
			0	5	10	20	50	ng/mL TRAIL
		1252	20354	17632	10230	8570	4631
		1543	23618	18354	11754	9938	5810
		1327	22108	15387	10399	8710	4974
		1436	23501	15396	11247	8431	4329
Figure 2F	Annexin V+ (%)
	PBS + Isotype	sFasL + isotype	sFasL + anti-DR5	sTRAIL + isotype	sTRAIL + anti-DR5
	8.72	30.5	20.1	27.2	6.65
	9.65	33.2	18.88	29.9	21.14
	10.35	34.28	17.65	33.21	18.86
	11.2	36.2	19.23	34.6	17.26
	10.25	35.48	15.38	33.29	13.26
	13.32	30.29	21.12	30.17	15.38
Figure 2G	PI+ (%)
	PBS + Isotype	sFasL + isotype	sFasL + anti-DR5	sTRAIL + isotype	sTRAIL + anti-DR5
	8.85	42.2	34.9	46.3	29.85
	9.95	41.75	30.2	40.29	29.87
	10.23	40.38	33.27	41.13	25.14
	7.38	38.88	35.24	42.39	31.78
	11.39	35.29	29.31	36.27	30.21
	13.38	39.31	31.17	40.78	31.69
Figure 2H	Ankle thickness (mm)
	Days	PBS						sFasL + Vehicle						sFasL + Z-VAD-FMK
	0	0	0	0	0	0	0	0	0	0	0	0	0	0	0	0	0	0	0
	1	0	0	0	0	0	0	0	0	0	0	0	0	0	0	0	0	0	0
	2	0.03	0.03	0.04	0.04	0.04	0.05	0.09	0.12	0.13	0.13	0.14	0.15	0.1	0.12	0.13	0.13	0.14	0.14
	3	0.08	0.08	0.09	0.11	0.11	0.11	0.22	0.23	0.24	0.25	0.26	0.26	0.21	0.23	0.26	0.28	0.31	0.32
	4	0.13	0.15	0.15	0.16	0.18	0.19	0.3	0.32	0.35	0.35	0.36	0.37	0.29	0.35	0.38	0.42	0.44	0.48
	5	0.16	0.21	0.25	0.26	0.27	0.28	0.41	0.45	0.52	0.58	0.62	0.68	0.43	0.48	0.52	0.58	0.65	0.72
	6	0.26	0.29	0.35	0.37	0.39	0.45	0.63	0.67	0.73	0.75	0.79	0.8	0.66	0.73	0.79	0.8	0.86	0.96
	7	0.29	0.35	0.43	0.45	0.46	0.49	0.75	0.76	0.79	0.89	0.95	0.99	0.75	0.79	0.92	0.95	0.99	1.08
	8	0.3	0.48	0.49	0.5	0.52	0.54	0.84	0.88	0.92	0.95	1.01	1.08	0.79	0.89	0.98	1.02	1.12	1.14
	9	0.31	0.49	0.53	0.55	0.55	0.55	0.87	0.92	0.95	1.05	1.08	1.1	0.81	0.93	1	1.03	1.15	1.15
	10	0.32	0.5	0.52	0.55	0.55	0.55	0.87	0.93	0.97	1.05	1.1	1.13	0.82	0.95	1.02	1.1	1.15	1.16
	Clinical scores
	Days	PBS						sFasL + Vehicle						sFasL + Z-VAD-FMK
	0	0	0	0	0	0	0	0	0	0	0	0	0	0	0	0	0	0	0
	1	0	0	0	0	0	0	0	0	0	0	0	0	0	0	0	0	0	0
	2	0	0	0	0	0	0	1	1	1	1	1	1	1	1	1	1	1	1
	3	0	0	0	1	1	1.5	1	1.5	2	2	2	2	1	1.5	1.5	2	2	2.5
	4	1	1	1	1	1	1.5	2	2	2	2.5	3	3.5	2	2	2	2	2	3
	5	2	2	2	2.5	3	3.5	4	5	5	5	5	5	4	4.5	5	5	5	5.5
	6	2	3	3	3	4	4	6.5	7	7	7.5	8	8	6	7	8	8	8	9
	7	2	4	5	5	5	5	7.5	8	8.5	9	9	9	7.5	9	9	9.5	9.5	10
	8	3	5	5	5	5	5	8	8.5	9	9.5	9.5	10	8	8	8	10	10	10
	9	3	5	5	5	5	5.5	8	8.5	9	10	10	10	8	8	8	10.5	11	11
	10	3	5	5	5	5	5.5	8	9	9	10	10	10	8	8	8	11	11	11

## Sheet: Figure 2 - figure supplement 3
Figure 2 - figure supplement 3A	Ankle thickness (mm)
	Days	Vehicle						Z-VAD-FMK
	0	0	0	0	0	0	0	0	0	0	0	0	0
	1	0	0	0	0	0	0	0	0	0	0	0	0
	2	0.04	0.05	0.05	0.05	0.07	0.05	0.04	0.04	0.06	0.07	0.08	0.1
	3	0.12	0.15	0.14	0.16	0.17	0.25	0.12	0.13	0.18	0.19	0.18	0.16
	4	0.35	0.35	0.35	0.36	0.38	0.37	0.35	0.34	0.36	0.37	0.36	0.38
	5	0.68	0.69	0.69	0.71	0.75	0.78	0.68	0.69	0.71	0.72	0.71	0.74
	6	0.83	0.84	0.85	0.88	0.87	0.89	0.83	0.85	0.87	0.87	0.91	0.94
	7	0.91	0.89	0.9	0.95	0.92	0.96	0.91	0.91	0.95	0.94	0.98	1.01
	8	0.91	0.94	0.94	0.98	0.95	1	0.91	0.91	0.96	0.97	1.06	1.1
	9	0.93	0.96	0.96	0.99	0.98	1.03	0.92	0.93	0.97	0.99	1.08	1.12
	10	0.94	0.97	0.97	0.99	0.99	1.03	0.92	0.94	0.98	0.99	1.1	1.15
	Clinical scores
	Days	Vehicle						Z-VAD-FMK
	0	0	0	0	0	0	0	0	0	0	0	0	0
	1	0	0	0	0	0	0	0	0	0	0	0	0
	2	0	0	0	0	0	0	0	0	0	0	0	0
	3	1.5	1.5	1.5	1.5	1.5	1.5	1	1	1.5	1.5	1	1
	4	3	3	3	3.5	3.5	2.5	2	2	2.5	3.5	3	2
	5	4.5	4.5	5	5	5.5	6	6	6	6	6	4	4.5
	6	6.5	6.5	6	6	6	6.5	7.5	6	6.5	7.5	6	7.5
	7	7	7	7	7.5	7.5	7	8	7.5	7	8.5	8	8.5
	8	7.5	8.5	9	9.5	9.5	9.5	9.5	8	8	8.5	9.5	7.5
	9	8	8.5	9	8.5	9.5	9.5	9	9	9	9.5	9	8
	10	8	9.5	9	8.5	9	9.5	9	9	9	9.5	9	8
