# Supplementary material for: Soluble Fas ligand drives autoantibody-induced arthritis by binding to DR5/TRAIL-R2
Source: eLife. 2021 Jul 5;10:e48840. doi: 10.7554/eLife.48840 (PMC8257255; doi:10.7554/eLife.48840)
Supplement: Figure 3—source data 1. [file elife-48840-fig3-data1.xlsx]

## Sheet: Figure 3
Figure 3C	Relative expression / Gapdh
	Cx3cl1	WT	Faslpr/lpr	Faslgld/gld	Tnfrsf10b KO	FaslΔs/Δs	Fas-/-
		1.28638	0.920519	0.402293	0.578386	0.441109	0.97351
		1.03984	1.11264	0.636886	0.09305	0.347408	1.11204
		1.18476	0.6811	0.332056	0.220914	0.558652	0.887416
		0.948137	1.02232	0.314394	0.189791	0.605854	0.761058
		0.540881	1.1158	0.196272	0.10014	0.350624	0.993502
Figure 3D	Relative expression / Gapdh
	Cx3cl1	CD45- + PBS	CD45- + sFasL	CD45+ + PBS	CD45+ + sFasL
		1.25127	2.00061	1.36699	0.64548
		0.430624	2.4881	1.34114	1.50612
		0.83403	2.83433	0.724093	0.351707
		1.48407	4.20345	0.826884	0.973618
Figure 3E	Relative expression / GAPDH
	CX3CL1	PBS	sFasL + Isotype	sFasL + anti-Fas	sFasL + anti-DR5	sFasL + anti-Fas + anti-DR5
		0.788259	2.50684	2.80499	2.77364	1.78869
		0.54453	3.75536	3.38157	1.3763	1.75626
		0.564912	4.94283	4.14041	1.61263	3.47884
		1.70716	3.90805	3.15245	1.009	1.30534
Figure 3F	Relative expression / GAPDH
	CX3CL1	Unstimulated	sg-Control	FAS KO	TNFRSF10B KO	dKO	dKO + TNFRSF10B	dKO + TNFRSF10B + FAS
		0.363721	6.82287	3.21082	0.253941	0.463554	5.41354	5.66815
		0.052784	5.41485	6.85515	1.11027	2.35668	4.29303	4.1963
		2.70402	4.55362	7.24804	2.39841	2.7827	5.59789	6.87253
		0.879478	2.93714	4.92831	1.10255	1.63776	4.43923	3.19919
Figure 3G	Relative expression / Gapdh
	Cx3cl1	WT + PBS	WT + sFasL	Faslpr/lpr + PBS	Faslpr/lpr + sFasL		Tnfrsf10b KO + PBS	Tnfrsf10b KO + sFasL	Fas-/- + PBS	Fas-/- +sFasL
		1.05785	2.86595	0.944367	3.07291		1.11852	0.492036	1.17337	2.33616
		1.02671	2.1083	1.02707	2.55311		1.35248	0.222528	1.26248	3.91113
		0.56401	2.28445	1.22385	2.54499		1.00694	0.935549	0.927262	1.82906
		1.35143	2.30965	1.14751	3.3147		0.419097	0.682114	0.982003	1.64909
Figure 3H	Relative expression / GAPDH
	CX3CL1	PBS	Vehicle	U0126	PD980259	SB203580	MG132	BMS345541
		0.12	2.32	2.17	2.2	2.31	0.84	1.13
		0.14	1.77	1.86	2.26	1.76	0.45	0.57
		0.22	2.15	1.95	1.55	1.66	0.92	0.66
		0.23	2.22	2.08	2.13	2.14	0.64	0.59
Figure 3I	Relative expression / GAPDH
	CX3CL1	si-Control	si-Control	si-RELA	si-CHUK	si-IKBKB
		0.8977	2.039	0.9601	1.3681	0.7605
		0.239	3.0735	0.8703	1.4284	1.0478
		0.3124	2.7164	1.0656	0.1961	1.1756
		0.7328	2.6549	1.6977	1.1364	0.9186
Figure 3J	CX3CL1 (pg/mL)
	PBS	sFasL	sTRAIL
	22.3618	309.335	65.3405
	77.1031	268.377	43.8101
	64.2029	438.101	79.2424
	57.2719	292.107	25.1795
Figure 3K	CX3CL1 (pg/mL)
	PBS		sFasL
	0	200	0	50	100	200	ng/mL TRAIL
	17.354	13.331	234.648	258.878	149.991	102.535
	20.711	17.936	241.281	182.858	150.014	89.22
	40.258	23.056	238.242	219.44	148.473	90.245
	13.434	8.657	235.846	217.385	187.672	121.671

## Sheet: Figure 3 - figure supplement 1
Figure 3 - figure supplement 1A	CX3CL1 (pg/mL)
	CD45-		CD45+
	PBS	sFasL	PBS	sFasL
	54.8693	251.35	80.5601	118.26
	73.7292	210.137	53.1241	97.9691
	61.2698	208.576	93.0858	47.0331
	133.466	138.072	46.3731	41.0011
	120.398	203.368	52.219	43.079
Figure 3 - figure supplement 1B	Relative expression / GAPDH
	CX3CL1	PBS	sFasL	FasL-Fc
		1.26333	2.79388	2.14284
		1.87369	3.25644	2.31103
		0.802804	1.29676	1.86566
		0.060175	2.93143	3.48805
		0.964165	2.66317	2.05748
Figure 3 - figure supplement 1C	CX3CL1 (pg/mL)
		PBS	sFasL	FasL-Fc
		17.354	234.648	258.878
		20.711	241.281	182.858
		40.258	198.242	219.44
		13.434	235.846	217.385
		16.392	235.176	228.084
Figure 3 - figure supplement 1D	Relative expression / GAPDH
	CX3CL1	Isotype	Isotype	anti-DR5	anti-DR5
		PBS	sFasL	sFasL	PBS
		0.545759	2.73437	2.12413	0.099601
		0.238522	2.71489	1.86384	1.50856
		1.5881	2.84716	0.225832	0.002479
		1.62762	1.47286	1.46313	1.73545
		1.66393	2.0686	2.67447	1.02237
Figure 3 - figure supplement 1E	CX3CL1 (pg/mL)
		Isotype	Isotype	anti-DR5	anti-DR5
		PBS	sFasL	sFasL	PBS
		31.681	328.978	218.442	31.02
		7.195	266.406	151.112	144.198
		39.622	200.49	102.187	2.786
		30.256	218.39	113.201	41.067
		46.294	254.087	132.846	52.948
Figure 3 - figure supplement 1F	CX3CL1 (pg/mL)
	PBS	sFasL
		Isotype	anti-Fas	anti-DR5	anti-Fas + anti-DR5
	52.5506	250.684	280.499	177.364	178.869
	36.302	300.429	270.525	110.104	140.5
	37.6608	370.712	310.531	120.947	260.913
	113.81	190.805	315.245	100.9	130.534
	36.297	238.067	332.474	115.308	132.297
Figure 3 - figure supplement 1G	Relative expression / Gapdh
	Cx3cl1	PBS	sFasL
			Isotype	anti-Fas	anti-DR5	anti-Fas + anti-DR5
		1.55287	11.5485	14.2957	4.34651	3.21878
		0.944295	10.8101	13.1394	0.761746	4.3154
		1.3974	5.20021	5.76089	7.61746	5.25665
		0.105434	15.3882	2.91808	2.24212	4.23569
		1.16014	9.79153	8.9163	2.26607	3.71373
Figure 3 - figure supplement 1H	CX3CL1 (pg/mL)
		PBS	sFasL
			Isotype	anti-Fas	anti-DR5	anti-Fas + anti-DR5
		50.7652	230.692	194.418	64.7798	58.9934
		40.5123	217.323	187.784	75.7543	69.1308
		77.5577	197.357	217.63	109.465	79.6334
		100.418	180.516	200.955	181.606	95.3487
		63.2874	208.413	196.204	100.168	88.317
Figure 3 - figure supplement 1I	Relative expression / GAPDH
	CX3CL1	PBS	sFasL
		si-Control	si-Control	si-TNFRSF1A	si-TNFRSF10A	si-FAS	si-TNFRSF12	si-TNFRSF10B
		1.04367	5.58985	4.60067	5.7472	5.03444	3.89415	2.72757
		0.524773	4.67919	6.02259	6.12642	5.75417	5.15098	1.62483
		1.19274	4.31974	5.94538	4.26684	4.54681	6.08264	2.69573
		1.23881	6.63124	3.90157	4.59692	8.25589	4.53737	2.91829
		0.855509	6.15343	3.92211	4.21545	5.94304	4.3146	2.43271
Figure 3 - figure supplement 1J	CX3CL1 (pg/mL)
	PBS	sFasL
	sgControl	sgControl	FAS KO	TNFRSF10B KO	DKO	DKO + TNFRSF10B	DKO + TNFRSF10B + FAS
	6.068	257.641	215.622	53.297	48.366	193.63	213.732
	22.621	262.294	272.171	49.324	35.803	258.769	216.398
	16.415	231.052	238.265	98.264	75.477	283.004	295.731
	22.094	208.473	236.863	32.058	43.268	204.196	288.413
	20.117	223.318	277.216	39.765	38.716	264.108	293.997
Figure 3 - figure supplement 1K	CX3CL1 (pg/mL)
	WT		Faslpr/lpr		Tnfrsf10b KO		Fas-/-
	PBS	sFasL	PBS	sFasL	PBS	sFasL	PBS	sFasL
	20.1182	210.534	76.1044	216.283	39.884	44.9451	20.2864	176.323
	19.2941	205.57	43.3935	185.715	55.5759	43.5426	16.5021	139.22
	30.7517	150.203	23.7889	194.736	81.9801	57.7395	21.4409	297.419
	13.2772	157.692	16.5186	215.683	47.2279	63.1399	49.5408	212.015
	50.1288	304.934	44.1952	198.798	53.259	61.014
Figure 3 - figure supplement 1J	CX3CL1 (pg/mL)
	PBS	sFasL
	(-)	Vehicle	U0126	PD980259	SB203580	MG132	BMS345541
	42.6599	192.332	215.224	135.794	114.952	48.5125	74.4875
	45.5279	195.488	152.369	146.205	109.937	43.225	48.975
	61.6789	148.621	133.782	139.639	145.523	50.298	69.204
	80.6595	109.147	145.327	158.482	147.076	48.3618	70.2041
	58.6874	164.109	135.111	147.692	142.394	46.824	62.017
Figure 3 - figure supplement 1K	CX3CL1 (pg/mL)
	PBS	sFasL
	si-Control	si-Control	si-RELA	si-CHUK	si-IKBKB
	29.8049	134.471	90.8769	95.7955	89.2374
	25.7061	150.456	87.5979	88.8275	90.467
	21.6074	140.619	83.909	87.5979	82.6793
	18.3283	160.908	92.1066	106.862	88.0078
	14.2295	146.153	90.0572	108.502	90.8769
	15.869	151.686	84.3188	111.781	92.9263
Figure 3 - figure supplement 1O	Relative expression / GAPDH
	CX3CL1	PBS		sFasL
		DMSO	Z-VAD-FMK	DMSO	Z-VAD-FMK
		1.14641	1.21718	2.78614	2.01763
		0.77892	0.854299	3.51373	3.05142
		1.3178	1.02153	2.82172	3.49516
		0.756869	1.96917	1.42841	1.46501
		1.2046	1.32919	2.43588	2.5276
Figure 3 - figure supplement 1P	CX3CL1 (pg/mL)
		PBS		sFasL
		DMSO	Z-VAD-FMK	DMSO	Z-VAD-FMK
		11.328	31.265	253.201	243.102
		20.418	44.392	260.12	234.001
		40.962	61.231	185.305	208.422
		36.208	51.236	239.615	237.517
		41.014	21.057	245.881	296.004

## Sheet: Figure 3 - figure supplement 2
Figure 3 - figure supplement 2A	Relative expression / Gapdh
	Cx3cl1	PBS	sFasL	sTRAIL
		0.81561	6.73424	0.384772
		1.99079	20.7366	1.11449
		0.374223	5.88688	0.573491
		0.81938	16.1003	0.128911
Figure 3 - figure supplement 2B	Relative expression / GAPDH
	CX3CL1	PBS		sFasL
		0	200	0	50	100	200	ng/mL sTRAIL
		0.508994	0.440498	9.13664	7.24855	5.34747	2.54344
		0.195213	1.5795	7.24355	2.04085	3.63043	1.34381
		0.9653	0.439662	4.96009	5.41383	3.32684	3.08865
		2.33049	0.611559	2.3565	4.94863	3.34896	2.40191
Figure 3 - figure supplement 2C	Ankle thickness (mm)
	Days	PBS						sFasL						sTRAIL
	0	0	0	0	0	0	0	0	0	0	0	0	0	0	0	0	0	0	0
	1	0	0	0	0	0	0	0	0	0	0	0	0	0	0	0	0	0	0
	2	0	0	0	0	0	0	0.04	0.05	0.07	0.08	0.09	0.09	0	0	0	0	0	0
	3	0.03	0.03	0.04	0.05	0.06	0.06	0.1	0.13	0.15	0.15	0.19	0.2	0.04	0.05	0.05	0.06	0.07	0.07
	4	0.08	0.08	0.09	0.1	0.11	0.13	0.21	0.23	0.26	0.28	0.3	0.31	0.1	0.12	0.13	0.14	0.15	0.15
	5	0.15	0.16	0.18	0.18	0.22	0.24	0.36	0.38	0.4	0.42	0.46	0.48	0.16	0.17	0.19	0.2	0.21	0.22
	6	0.26	0.27	0.33	0.39	0.4	0.41	0.57	0.58	0.64	0.66	0.69	0.68	0.24	0.25	0.32	0.33	0.37	0.39
	7	0.29	0.33	0.39	0.4	0.43	0.44	0.65	0.69	0.7	0.73	0.79	0.84	0.28	0.3	0.33	0.34	0.4	0.42
	8	0.31	0.36	0.42	0.43	0.44	0.46	0.69	0.74	0.78	0.82	0.85	0.89	0.34	0.37	0.39	0.4	0.42	0.44
	9	0.32	0.38	0.43	0.44	0.46	0.47	0.74	0.77	0.82	0.83	0.92	0.94	0.34	0.39	0.4	0.42	0.44	0.45
	10	0.32	0.4	0.44	0.45	0.46	0.47	0.76	0.8	0.83	0.88	0.94	0.95	0.35	0.4	0.41	0.44	0.45	0.45
	Clinical scores
	Days	PBS						sFasL						sTRAIL
	0	0	0	0	0	0	0	0	0	0	0	0	0	0	0	0	0	0	0
	1	0	0	0	0	0	0	0	0	0	0	0	0.5	0	0	0	0	0	0
	2	0	0	0	0	0	0	0.5	0.5	0.5	0.5	1	1	0	0	0	0	0.5	0.5
	3	0.5	0.5	0.5	0.5	1	1	1	1	1	1	1.5	1.5	0.5	0.5	0.5	1	1	1
	4	1	1	1	1	1.5	2	2	2	2	2	2	2	1	1	2	2	1.5	1.5
	5	2	2	2.5	3	3.5	3.5	4	4	4	4	4	4.5	2	2	2	2.5	2.5	3
	6	3	3	3.5	3.5	4	4.5	5.5	5.5	6	6	6.5	7	3.5	3.5	4	4	4	4.5
	7	3.5	3.5	3.5	4	4.5	5	6.5	6.5	7	7	7	7.5	4	4	4	4	4	4.5
	8	4	4	4	4	4	5	7	7	7	7	7.5	8	4	4	4	4	4	5
	9	4	4	4	4	4.5	5	7	7	7.5	8	8	8	4	4	4.5	4.5	5	5
	10	4	4	4.5	4.5	4.5	5	7	8	8	8	8	8	4	4	4	5	5	5
Figure 3 - figure supplement 2D	Relative expression / Gapdh
	Il1b			Il4			Il6			Tnfa			Tgfb			Cx3cl1			Ccl2			Ccl3			Cxcl10
	PBS	sTRAIL	sFasL	PBS	sTRAIL	sFasL	PBS	sTRAIL	sFasL	PBS	sTRAIL	sFasL	PBS	sTRAIL	sFasL	PBS	sTRAIL	sFasL	PBS	sTRAIL	sFasL	PBS	sTRAIL	sFasL	PBS	sTRAIL	sFasL
	0.465634	0.610432	5.18341	0.88697	0.962455	1.287	0.651288	0.691681	2.7065	0.293047	0.059803	2.27588	0.558791	1.14173	1.74626	0.540635	0.491252	3.25382	0.69604	0.524802	3.62017	0.367832	0.599613	2.5034	1.17055	1.76298	2.49139
	0.648528	0.832488	5.72933	0.925602	1.0493	1.54263	0.698235	0.851431	3.78173	0.879141	0.119605	2.34164	0.802684	1.80357	1.82437	0.982006	1.47375	3.2611	0.700817	0.746763	5.50083	0.881109	1.19923	2.54135	0.436893	1.27096	1.33441
	1.22086	0.703028	7.71698	1.06943	1.34962	1.57289	1.25401	1.01857	3.95424	0.942604	1.17734	2.35732	1.05781	1.94414	2.29126	1.08127	1.12673	4.54884	1.21106	1.49353	5.93399	1.10349	1.29198	3.48358	1.34967	0.653918	2.1368
	1.66498	1.06825	8.23666	1.118	1.35722	1.90887	1.39647	1.35119	4.08025	1.88521	1.17941	3.36678	1.58072	1.97361	2.40593	1.39609	2.22535	4.60504	1.39208	1.57441	6.08769	1.64756	1.69619	3.59348	1.04289	0.499299	2.21444
	1.05173	1.35039	4.69558	0.694843	1.03408	1.54879	0.477444	0.277262	4.9982	0.375577	0.481662	3.35176	1.42042	0.839209	1.04959	0.683731	0.425522	4.34749	1.08441	0.350937	5.42783	0.240603	0.954136	3.051	0.0561061	0.695471	2.14481
	1.3905	0.804195	3.54444	1.43708	0.860951	1.06149	0.444126	0.618637	3.74483	0.333484	0.970794	2.90574	1.27365	0.0836115	1.47794	0.738776	0.826435	3.92488	0.289872	0.33411	4.46816	1.10014	0.894013	2.21632	0.437963	0.762973	3.47235
Figure 3 - figure supplement 2E	Ankle thickness (mm)
	Days	PBS						sTRAIL						sFasL
	0	0	0	0	0	0	0	0	0	0	0	0	0	0	0	0	0	0	0
	1	0	0	0	0	0	0	0	0	0	0	0	0.02	0	0	0	0.03	0.04	0.05
	2	0.02	0.03	0.03	0.05	0.05	0.06	0.03	0.03	0.04	0.05	0.05	0.05	0.05	0.08	0.09	0.1	0.11	0.12
	3	0.05	0.05	0.05	0.08	0.1	0.13	0.06	0.07	0.08	0.08	0.1	0.11	0.12	0.13	0.18	0.19	0.23	0.25
	4	0.09	0.12	0.13	0.15	0.19	0.2	0.1	0.13	0.14	0.18	0.22	0.23	0.2	0.21	0.25	0.29	0.32	0.38
	5	0.17	0.21	0.23	0.25	0.27	0.28	0.19	0.22	0.25	0.28	0.29	0.3	0.28	0.33	0.38	0.4	0.42	0.46
	6	0.28	0.3	0.31	0.35	0.39	0.41	0.27	0.29	0.31	0.35	0.39	0.43	0.45	0.52	0.56	0.58	0.6	0.62
	7	0.29	0.32	0.38	0.4	0.42	0.45	0.31	0.35	0.42	0.44	0.45	0.49	0.58	0.62	0.65	0.68	0.69	0.7
	8	0.32	0.36	0.4	0.41	0.45	0.46	0.33	0.39	0.43	0.46	0.5	0.52	0.6	0.65	0.69	0.71	0.75	0.79
	9	0.32	0.37	0.4	0.42	0.46	0.47	0.35	0.4	0.46	0.48	0.52	0.53	0.63	0.68	0.72	0.73	0.77	0.85
	10	0.32	0.38	0.41	0.44	0.48	0.47	0.35	0.42	0.48	0.5	0.52	0.53	0.65	0.7	0.75	0.79	0.8	0.88
	Clinical scores
	Days	PBS						sTRAIL						sFasL
	0	0	0	0	0	0	0	0	0	0	0	0	0	0	0	0	0	0	0
	1	0	0	0	0	0	0	0	0	0	0	0	0	0	0.5	0.5	0	0.5	0.5
	2	0.5	0.5	0.5	1	1	1	0.5	0.5	1	0.5	1	1.5	1	1	1	1	1.5	1.5
	3	1	1	1	1.5	1.5	2	1.5	1.5	1.5	1.5	2	2.5	2	2	2	2	2.5	2.5
	4	2	2	2	2	2.5	3	2	2	2	2.5	2.5	3	3	3.5	3.5	3	3.5	4
	5	3.5	3.5	4	3.5	4	4.5	3	3	4	3	3	3.5	4	5.5	6	5	5	6
	6	4.5	5	5.5	5	6	6.5	4	4.5	4.5	4.5	4.5	5.5	6.5	7	7.5	7.5	8	8
	7	5	5.5	6.5	5.5	7	7.5	4.5	6	6.5	4.5	5	6.5	6.5	7.5	8	8.5	9.5	9.5
	8	5.5	6	6.5	5.5	7	7.5	5	5.5	7	5	5	7	7	8	9	9	10	10.5
	9	6	6	7	6	7.5	8	5	6	8	5	5	7	7	9	9.5	9.5	11	11
	10	6	7	7	6	8	8	5	7	8	5	5	7	8	10	10	9.5	10	11
Figure 3 - figure supplement 2F	Relative expression / Gapdh
	Il1b			Il4			Il6			Tnfa			Tgfb			Cx3cl1			Ccl2			Ccl3			Cxcl10
	PBS	sTRAIL	sFasL	PBS	sTRAIL	sFasL	PBS	sTRAIL	sFasL	PBS	sTRAIL	sFasL	PBS	sTRAIL	sFasL	PBS	sTRAIL	sFasL	PBS	sTRAIL	sFasL	PBS	sTRAIL	sFasL	PBS	sTRAIL	sFasL
	2.49501	0.92314	2.02568	1.05922	0.221628	0.503236	0.158335	2.28118	6.20348	0.303786	0.053071	3.51333	1.59307	2.24599	0.060691	0.627251	1.38171	3.69806	0.907046	1.00339	3.6532	0.669848	0.574585	1.21787	0.5716	0.348308	2.59033
	1.2346	1.24179	2.03916	1.18584	1.58883	1.23388	0.500018	0.439441	2.50041	0.884532	1.41756	3.08951	1.49733	0.040461	1.98592	1.50581	1.07449	3.43435	1.00096	0.476703	2.04085	0.326583	1.27342	2.92369	0.915801	0.265692	3.50711
	0.020167	2.21818	4.51927	0.228438	1.77876	0.734082	0.968065	2.9365	7.12258	0.769747	0.438625	2.31673	0.026974	1.32394	1.07281	0.836265	0.701164	3.92752	0.857305	0.43262	2.25216	1.59818	1.37621	1.6237	1.5719	0.391867	2.20317
	0.250223	0.42794	4.88405	1.5265	0.342657	0.123462	2.37358	0.426342	6.61467	2.04194	1.82263	2.20882	0.88263	0.715204	1.60921	1.03067	1.70671	4.83129	1.23469	2.77241	1.92894	1.40539	0.934314	2.00116	0.940701	1.42871	1.25394
	0.956406	0.869892	4.41124	1.51546	1.10875	1.18575	0.861423	0.77143	5.66244	0.545904	0.399135	3.11989	0.505133	1.30418	1.32566	0.90504	1.59583	4.79504	0.557506	1.07335	3.24811	0.547773	1.29913	2.59798	0.742204	0.471667	3.38
	0.689133	0.453308	3.51427	0.716596	1.13303	0.77619	0.00629961	0.313621	4.88067	0.143244	0.385961	3.39707	0.886213	0.415749	1.14573	1.33938	0.653484	4.10213	0.809097	1.33796	2.40889	0.889504	1.04822	3.08852	0.34947	0.288337	2.29995
