# Supplementary material for: Soluble Fas ligand drives autoantibody-induced arthritis by binding to DR5/TRAIL-R2
Source: eLife. 2021 Jul 5;10:e48840. doi: 10.7554/eLife.48840 (PMC8257255; doi:10.7554/eLife.48840)
Supplement: Figure 4—source data 1. [file elife-48840-fig4-data1.xlsx]

## Sheet: Figure 4
Figure 4A	Ankle thickness (mm)
	Days	Isotype					anti-DR5					anti-Fas
	0	0	0	0	0	0	0	0	0	0	0	0	0	0	0	0
	1	0	0	0	0	0	0	0	0	0	0	0	0	0	0	0
	2	0	0.05	0.07	0.1	0.1	0	0	0	0	0	0	0	0.09	0.12	0.15
	3	0.05	0.14	0.17	0.22	0.25	0.04	0.08	0.09	0.1	0.06	0.11	0.12	0.2	0.23	0.26
	4	0.24	0.32	0.32	0.37	0.37	0.1	0.17	0.2	0.24	0.13	0.27	0.29	0.35	0.35	0.35
	5	0.5	0.67	0.7	0.76	0.77	0.2	0.36	0.4	0.43	0.2	0.55	0.47	0.74	0.79	0.8
	6	0.7	0.83	0.85	0.91	0.94	0.31	0.54	0.58	0.62	0.35	0.65	0.69	0.88	0.85	0.93
	7	0.8	0.89	0.91	0.98	1	0.45	0.59	0.65	0.66	0.47	0.75	0.78	0.94	0.88	0.95
	8	0.85	0.91	0.93	0.99	1	0.5	0.6	0.66	0.69	0.69	0.9	0.8	0.95	0.89	0.95
	9	0.89	0.92	0.92	1	1	0.57	0.6	0.69	0.7	0.73	0.8	0.84	0.94	0.9	0.97
	10	0.9	0.92	0.93	1	1.1	0.57	0.61	0.67	0.73	0.74	0.82	0.85	0.94	0.96	0.99
	Clinical scores
	Days	Isotype					anti-DR5					anti-Fas
	0	0	0	0	0	0	0	0	0	0	0	0	0	0	0	0
	1	0	0	0	0	0	0	0	0	0	0	0	0	0	0	0
	2	0	0	0	0	0.5	0	0	0	0	1	0	0	0	0.5	0.5
	3	1	1	1	1	2	0	0.5	0.5	1	1.5	0.5	0.5	1	1	1.5
	4	1.5	2	3	3.5	3.5	0.5	1	1.5	2	2.5	1.5	1.5	2	3	3
	5	4	5	5	5.5	6	2	3	3	3	3.5	4.5	5	5	5	5.5
	6	6.5	7	7	7.5	8.5	3.5	4.5	5.5	5	5	6	6	6	6.5	7
	7	7	7	7	8.5	9	4	5	5.5	5.5	6	7.5	8	8	8	8
	8	7.5	8	8	9.5	9.5	5	5.5	6	6	6	7.5	8	8	8.5	8.5
	9	8	8.5	9	10	9.5	5	6	6.5	6.5	6.5	8	9	9	9	9.5
	10	8	9	9	10	10	5.5	6	6	6	6.5	8	9	9	9.5	10
Figure 4B	Ankle thickness (mm)
	Days	WT										Tnfrsf10b KO
		PBS					sFasL					PBS					sFasL
	0	0	0	0	0	0	0	0	0	0	0	0	0	0	0	0	0	0	0	0	0
	1	0.03	0.03	0.04	0.05	0.05	0	0	0.1	0.1	0.1	0	0	0	0	0	0	0	0	0.01	0.02
	2	0.09	0.09	0.1	0.1	0.11	0.1	0.15	0.15	0.15	0.15	0.02	0.02	0.03	0.04	0.05	0.03	0.03	0.03	0.03	0.05
	3	0.15	0.15	0.15	0.16	0.17	0.2	0.2	0.21	0.22	0.22	0.05	0.05	0.08	0.09	0.1	0.06	0.07	0.09	0.09	0.1
	4	0.22	0.23	0.25	0.25	0.26	0.32	0.35	0.35	0.37	0.38	0.1	0.1	0.12	0.15	0.15	0.12	0.12	0.13	0.15	0.17
	5	0.3	0.32	0.37	0.38	0.39	0.45	0.47	0.55	0.6	0.65	0.18	0.2	0.2	0.22	0.22	0.17	0.19	0.2	0.22	0.24
	6	0.37	0.37	0.42	0.45	0.47	0.56	0.6	0.65	0.68	0.7	0.19	0.19	0.21	0.24	0.25	0.2	0.21	0.22	0.25	0.28
	7	0.39	0.41	0.45	0.47	0.49	0.59	0.65	0.68	0.72	0.75	0.2	0.24	0.26	0.28	0.29	0.22	0.23	0.25	0.29	0.31
	8	0.42	0.45	0.45	0.5	0.52	0.62	0.65	0.69	0.75	0.77	0.2	0.25	0.28	0.31	0.32	0.24	0.28	0.29	0.29	0.32
	9	0.45	0.47	0.5	0.51	0.51	0.65	0.65	0.7	0.75	0.78	0.23	0.27	0.29	0.32	0.35	0.25	0.28	0.3	0.31	0.35
	10	0.46	0.5	0.5	0.51	0.52	0.67	0.7	0.76	0.8	0.81	0.27	0.3	0.31	0.33	0.35	0.27	0.3	0.3	0.32	0.34
	Clinical scores
	Days	WT										Tnfrsf10b KO
		PBS					sFasL					PBS					sFasL
	0	0	0	0	0	0	0	0	0	0	0	0	0	0	0	0	0	0	0	0	0
	1	0	0	0	0	0	0	0	0	0	0	0	0	0	0	0	0	0	0	0	0
	2	0	0	0	1	1	0	1	1.5	2	2	0	0	0	1	1	0	0	0	0	1
	3	1	1	1.5	1.5	2	2	2	2.5	4	4	0	0	1	1	1	0.5	0.5	1	1	1
	4	3	3.5	3.5	3.5	4	4	4	5	6	6	1	2	2.5	2.5	2.5	1	1	1.5	2.5	2.5
	5	5	5	5	5.5	5.5	6.5	7	7	8	9	2	2	2.5	2.5	3	1.5	2	2	2.5	3
	6	5.5	5.5	5.5	6	6.5	8	8	9	9.5	9.5	2	2.5	2.5	2.5	3	2	2	2.5	2.5	3.5
	7	6	6	6	6	6.5	8.5	8.5	9	9.5	10	2	2.5	3	3	3	2	2	3	3.5	4
	8	6	6	6	7	7	9	8.5	9	9	9.5	2	3	3	3	3.5	2	2.5	3.5	4	4
	9	6	6	7	7	7	9	9	9.5	9.5	10	2	2	3	3	3.5	2	3	3	3.5	4
	10	6	6	6.5	7	7	9	9	9	9.5	10	2	2.5	3	3	3	2	3	3	3.5	3.5
Figure 4D	Relative expression / Gapdh
	Cx3cl1	WT		Tnfrsf10b KO		FaslΔs/Δs		FaslΔm/Δm
		PBS	sFasL	PBS	sFasL	PBS	sFasL	PBS	sFasL
		1.1829	2.7105	0.6627	0.5916	0.044996	2.9599	1.1118	2.282
		1.3244	2.8852	0.535	0.5367	0.403665	1.91286	1.93121	3.35781
		1.2874	2.8395	0.5921	0.5648	0.27753	0.629518	0.774547	3.82572
		1.2936	2.253	0.8324	0.5528	0.315057	1.84329	1.20156	2.66106
		1.0521	3.3364	0.5832	0.4109	0.452117	2.25904	1.1166	3.89715
Figure 4E	Ankle thickness (mm)
	Days	PBS						CX3CL1
	0	0	0	0	0	0	0	0	0	0	0	0	0
	1	0	0	0	0	0	0	0.05	0.06	0.08	0.09	0.11	0.13
	2	0.05	0.05	0.06	0.08	0.1	0.11	0.12	0.18	0.19	0.2	0.2	0.2
	3	0.1	0.11	0.11	0.13	0.18	0.22	0.21	0.22	0.25	0.26	0.26	0.26
	4	0.17	0.2	0.25	0.26	0.28	0.28	0.3	0.31	0.33	0.35	0.36	0.39
	5	0.2	0.25	0.3	0.32	0.33	0.35	0.48	0.5	0.52	0.53	0.53	0.53
	6	0.2	0.29	0.35	0.37	0.42	0.45	0.56	0.6	0.61	0.61	0.62	0.62
	7	0.25	0.35	0.39	0.43	0.47	0.5	0.57	0.61	0.63	0.67	0.68	0.68
	8	0.29	0.35	0.42	0.47	0.5	0.52	0.59	0.65	0.66	0.67	0.68	0.72
	9	0.3	0.36	0.42	0.5	0.52	0.55	0.6	0.7	0.7	0.7	0.71	0.75
	10	0.35	0.4	0.41	0.42	0.47	0.49	0.66	0.7	0.72	0.73	0.74	0.76
	Clinical scores
	Days	PBS						CX3CL1
	0	0	0	0	0	0	0	0	0	0	0	0	0
	1	0	0	0	0	0	0	0	0	0.5	0.5	0.5	0.5
	2	0	0	0.5	0.5	0.5	0.5	0.5	1	1	1	1	1
	3	0	1	1	1	1	1	1.5	1.5	1.5	1.5	1.5	1.5
	4	1	1	1	1	2	2	3	3	3	3.5	3.5	3.5
	5	1	1	1.5	1.5	2	2	5	5.5	5.5	5.5	5.5	5.5
	6	2	2	2	2	2.5	3	6	6	6	6	6	6
	7	2	2	2.5	3	3	3	6.5	7	7	7	7	7
	8	3	3	3	3	3	3	7	7.5	7.5	8	8	8
	9	3	3	3	3.5	3.5	4	7	7	7	8	8	8
	10	3	3	3.5	3.5	4	4	7.5	7.5	7.5	7.5	8	8.5
Figure 4F	Relative expression / Gapdh
	Il1b		Il4		Il6		Tnfa		Tgfb		Cx3cl1		Ccl2		Ccl3		Cxcl10
	PBS	CX3CL1	PBS	CX3CL1	PBS	CX3CL1	PBS	CX3CL1	PBS	CX3CL1	PBS	CX3CL1	PBS	CX3CL1	PBS	CX3CL1	PBS	CX3CL1
	0.519679	1.74645	0.826812	1.55129	0.339638	2.83197	1.32903	0.798535	0.501416	1.18349	1.38934	3.35903	0.940855	3.34336	0.255859	2.36519	0.618302	3.84294
	0.463822	2.87659	1.254	0.946804	0.87689	0.642556	1.11194	2.40363	1.95005	1.92113	0.854958	3.30671	1.19095	1.69528	0.826147	2.03769	0.471952	0.996721
	2.08733	2.80987	0.886984	1.30602	1.06355	3.13248	0.102585	2.54903	0.508582	0.926289	0.568681	2.5835	1.24948	2.53084	1.10229	1.53689	1.11205	1.65824
	0.929165	0.815576	0.732206	0.329204	1.71992	3.29077	1.45645	1.8995	1.03995	0.900788	1.18702	2.20671	0.618717	2.2642	1.40657	1.49721	0.453893	3.149
	0.586181	1.46761	0.960002	1.16426	1.33119	3.34073	0.803192	1.92032	0.852973	2.09408	0.820554	2.88727	1.3999	3.14315	1.35994	2.24202	1.27156	3.09807
	0.647371	1.78143	1.02322	0.579069	1.08639	2.61618	1.25884	1.25101	0.970458	1.41146	1.09028	3.46074	1.10969	2.33069	0.899542	2.55064	0.828259	2.05423
Figure 4G	Ankle thickness (mm)
	Days	WT						Cx3cr1 KO						Cx3cr1 KO + sFasL
	0	0	0	0	0	0	0	0	0	0	0	0	0	0	0	0	0	0	0
	1	0	0	0.03	0.04	0.05	0.05	0	0	0	0	0	0	0	0	0	0	0	0
	2	0.04	0.05	0.07	0.09	0.09	0.09	0	0.03	0.05	0.05	0.06	0.06	0	0.03	0.05	0.05	0.05	0.06
	3	0.1	0.1	0.14	0.15	0.16	0.17	0.06	0.07	0.07	0.09	0.1	0.12	0.04	0.06	0.07	0.09	0.09	0.11
	4	0.2	0.2	0.23	0.28	0.3	0.31	0.1	0.12	0.15	0.18	0.2	0.21	0.1	0.12	0.15	0.17	0.2	0.21
	5	0.44	0.46	0.49	0.5	0.5	0.5	0.2	0.22	0.24	0.28	0.33	0.36	0.17	0.21	0.23	0.27	0.33	0.35
	6	0.7	0.73	0.75	0.78	0.78	0.79	0.31	0.35	0.37	0.44	0.49	0.52	0.27	0.35	0.37	0.41	0.47	0.51
	7	0.75	0.78	0.79	0.79	0.8	0.83	0.34	0.42	0.45	0.45	0.52	0.59	0.29	0.4	0.44	0.45	0.5	0.58
	8	0.79	0.79	0.82	0.84	0.85	0.88	0.34	0.44	0.5	0.52	0.6	0.62	0.3	0.41	0.5	0.51	0.59	0.61
	9	0.81	0.84	0.88	0.9	0.92	0.93	0.34	0.46	0.52	0.52	0.6	0.64	0.33	0.42	0.51	0.52	0.59	0.62
	10	0.83	0.87	0.88	0.9	0.94	0.95	0.36	0.46	0.52	0.54	0.6	0.65	0.33	0.42	0.52	0.54	0.6	0.64
	Clinical scores
	Days	WT						Cx3cr1 KO						Cx3cr1 KO + sFasL
	0	0	0	0	0	0	0	0	0	0	0	0	0	0	0	0	0	0	0
	1	0	0	0	0	0	0	0	0	0	0	0	0	0	0	0	0	0	0
	2	0	0	0	0.5	0.5	1	0	0	0	0.5	0.5	0.5	0	0	0	0.5	0.5	0.5
	3	0	1	1	1.5	1.5	2	0.5	0.5	0.5	0.5	1	1	0.5	0.5	0.5	1	1	1
	4	1	2	2.5	2.5	3	3	1	1	1.5	1.5	1.5	2	1	1.5	1.5	1.5	2	2
	5	2	3	5.5	5.5	6	6	2.5	2.5	2.5	3	3.5	3.5	2.5	2.5	3	3	3.5	3.5
	6	4	5	7	7	7	7	3.5	4	4	4.5	5	5.5	3.5	4	4.5	4.5	5	5.5
	7	5	6	8	8	8	8	3.5	4.5	4.5	5	5.5	5.5	4	4.5	5	5.5	5.5	6
	8	6	6.5	9.5	9.5	9.5	10	4	5	5	5.5	5.5	6	4	5	5.5	5.5	6	6.5
	9	7	7	9.5	9.5	9.5	10	4	5.5	5.5	6	6.5	6.5	5	5.5	6	6	6.5	7
	10	7	7	9	10	11	11	4	6	6	6.5	7	7	5.5	6	6	6.5	7	7

## Sheet: Figure 4 - figure supplement 1
Figure 4 - figure supplement 1A	Ankle thickness (mm)
	Days	PBS						sFasL + isotype control						sFasL + anti-Fas						sFasL + anti-DR5
	0	0	0	0	0	0	0	0	0	0	0	0	0	0	0	0	0	0	0	0	0	0	0	0	0
	1	0	0	0	0	0	0	0	0	0	0	0	0	0	0	0	0	0	0	0	0	0	0	0	0
	2	0	0	0	0	0	0	0	0	0	0.01	0.03	0.04	0	0	0	0	0	0	0	0	0	0	0	0
	3	0.04	0.04	0.05	0.05	0.05	0.06	0.12	0.12	0.17	0.2	0.25	0.25	0.15	0.19	0.21	0.23	0.34	0.35	0.11	0.12	0.12	0.13	0.13	0.14
	4	0.1	0.1	0.11	0.12	0.12	0.12	0.24	0.24	0.29	0.31	0.33	0.33	0.23	0.27	0.28	0.3	0.55	0.51	0.17	0.17	0.23	0.24	0.27	0.39
	5	0.18	0.19	0.19	0.19	0.22	0.22	0.45	0.47	0.49	0.51	0.62	0.67	0.47	0.5	0.65	0.66	0.77	0.74	0.29	0.3	0.33	0.42	0.47	0.5
	6	0.27	0.27	0.28	0.29	0.3	0.33	0.61	0.63	0.65	0.83	0.85	0.94	0.59	0.61	0.73	0.77	1.19	1.14	0.47	0.48	0.51	0.51	0.67	0.78
	7	0.42	0.42	0.43	0.53	0.58	0.59	0.7	0.7	0.84	0.95	1.08	1.13	0.75	0.78	0.83	1	1.22	1.25	0.49	0.51	0.6	0.75	0.82	0.86
	8	0.47	0.48	0.52	0.65	0.65	0.65	0.77	0.85	0.98	0.92	1.09	1.21	0.77	0.79	0.85	0.99	1.27	1.29	0.52	0.62	0.67	0.79	0.93	0.97
	9	0.5	0.52	0.53	0.66	0.67	0.67	0.79	0.85	1.1	1.15	1.19	1.22	0.79	0.81	0.85	1.15	1.32	1.3	0.55	0.7	0.72	0.74	0.79	0.98
	10	0.5	0.51	0.52	0.67	0.68	0.68	0.8	0.85	1.1	1.15	1.2	1.22	0.8	0.81	0.85	1.16	1.33	1.3	0.55	0.69	0.74	0.77	0.82	1
	Clinical scores
	Days	PBS						sFasL + isotype control						sFasL + anti-Fas						sFasL + anti-DR5
	0	0	0	0	0	0	0	0	0	0	0	0	0	0	0	0	0	0	0	0	0	0	0	0	0
	1	0	0	0	0	0	0	0	0	0	0	0	0	0	0	0	0	0	0	0	0	0	0	0	0
	2	0	0	0	0	0	0	0	0	0	0	0	0	0	0	0	0	0	0	0	0	0	0	0	0
	3	0.5	0.5	0.5	1	1	1.5	1	1	1	1	1	1	0.5	0.5	0.5	1	1	1.5	0.5	0.5	0.5	1	1	1.5
	4	0.5	0.5	1	1	1.5	1.5	2	2	2	2	2	2	1	1	1.5	1.5	1.5	2	1.5	1.5	1.5	1.5	1.5	2
	5	1	1	1.5	1.5	2	2	3.5	3.5	4	4	5	5	2.5	2.5	3	3	3.5	4.5	1.5	1.5	2	2	2.5	2.5
	6	1.5	2	2	2.5	3	3	5	5	5.5	6	6.5	6.5	4	4.5	4.5	5	5.5	6.5	2.5	2.5	2.5	3	3	3
	7	1.5	2	2	2.5	3	3	5.5	5.5	6	6.5	7	7.5	4.5	5	5.5	6	6.5	7.5	3	3.5	3.5	4	4	4.5
	8	1.5	2	2.5	3	3	3.5	6	6	6	7.5	7.5	8	5	6	6.5	7	7.5	8	3	3.5	3.5	4.5	4.5	5
	9	2	2	3	3.5	3.5	3.5	6	6.5	7	7.5	8	8	5.5	6	6.5	7	7.5	8.5	3.5	4	4	4.5	5	5
	10	2	2	3	4	4	4	6	6.5	7	7.5	8	8	5.5	6	6.5	7	8	8.5	3.5	4	4	4.5	5	5
Figure 4 - figure supplement 1B	Il1b				Il4				Il6				Tnfa				Tgfb				Ccl2				Ccl3				Cxcl10
	PBS	sFasL + isotype control	sFasL + anti-Fas	sFasL + anti-DR5	PBS	sFasL + isotype control	sFasL + anti-Fas	sFasL + anti-DR5	PBS	sFasL + isotype control	sFasL + anti-Fas	sFasL + anti-DR5	PBS	sFasL + isotype control	sFasL + anti-Fas	sFasL + anti-DR5	PBS	sFasL + isotype control	sFasL + anti-Fas	sFasL + anti-DR5	PBS	sFasL + isotype control	sFasL + anti-Fas	sFasL + anti-DR5	PBS	sFasL + isotype control	sFasL + anti-Fas	sFasL + anti-DR5	PBS	sFasL + isotype control	sFasL + anti-Fas	sFasL + anti-DR5
	0.252568	3.34005	4.78759	1.7571	0.690141	0.159478	1.08099	0.072837	0.538965	2.83984	3.06775	2.0464	0.40548	2.56393	1.80506	1.05998	0.76821	1.05903	1.94882	0.396823	2.35687	7.86065	7.5581	2.26634	0.950465	3.03686	3.93452	2.85429	0.884699	3.74015	3.06057	2.10891
	1.4757	3.83732	4.39379	0.328007	0.927038	0.938013	0.096564	0.871368	1.19721	3.20648	1.36826	1.44989	0.560207	3.06286	3.10426	1.3322	1.13112	0.179765	1.36593	0.856079	0.863813	8.46118	8.0009	4.64143	0.851397	3.05101	3.46802	1.60937	0.41151	2.7335	4.08445	1.03106
	1.25052	5.25563	1.63234	1.31226	0.877192	1.37023	0.88623	0.251753	0.985554	3.432	2.29872	1.08953	0.701185	1.93486	3.20225	1.87643	1.3657	0.429518	0.818014	1.35128	0.262115	3.07618	4.28434	3.72985	1.06796	3.33719	1.63726	1.5437	1.29788	3.58285	3.99512	1.72807
	1.02121	5.57725	2.69387	2.9953	1.50563	0.119629	0.349416	1.03527	1.27827	1.75222	2.59867	0.752792	2.33313	2.60537	2.25829	1.36882	0.734973	1.56552	0.589068	0.7278	0.517207	4.39213	4.79952	3.15719	1.13018	3.21096	2.83159	2.68235	1.40591	3.01876	3.20525	0.613798
	1.24811	4.54777	4.29913	0.597975	0.742204	0.471667	1.38	0.998007	1.17729	3.39396	3.48946	1.21527	1.02803	4.61671	3.69571	1.19601	0.555323	1.44295	0.857021	0.904885	0.57847	5.86151	4.34661	2.12972	0.409004	5.5852	2.728	0.647995	0.995107	3.20381	3.84442	0.761818
	0.408895	3.8895	3.04822	0.0885196	1.34947	1.28834	1.29995	1.0857	0.646746	2.25353	2.5266	1.00775	1.01889	3.23669	4.10988	1.25903	1.26737	0.989673	0.621836	1.31134	0.34498	4.62477	5.14209	1.57122	0.887222	3.60475	4.95843	1.24487	0.901527	3.37122	3.63623	2.13773
Figure 4 - figure supplement 1C	Anlke thickness (mm)
	Days	PBS						CX3CL1
	0	0	0	0	0	0	0	0	0	0	0	0	0
	1	0	0	0	0	0	0	0	0	0	0	0	0
	2	0.03	0.03	0.04	0.04	0.04	0.05	0.08	0.09	0.1	0.1	0.1	0.1
	3	0.08	0.08	0.09	0.1	0.11	0.12	0.18	0.19	0.19	0.2	0.21	0.21
	4	0.13	0.14	0.14	0.15	0.17	0.18	0.29	0.32	0.32	0.32	0.33	0.34
	5	0.18	0.21	0.23	0.24	0.24	0.25	0.38	0.42	0.45	0.46	0.49	0.51
	6	0.26	0.29	0.3	0.32	0.35	0.36	0.58	0.69	0.71	0.72	0.75	0.77
	7	0.29	0.33	0.34	0.36	0.39	0.4	0.74	0.78	0.79	0.83	0.85	0.86
	8	0.31	0.38	0.39	0.4	0.41	0.42	0.8	0.84	0.86	0.89	0.93	0.95
	9	0.32	0.39	0.39	0.41	0.43	0.44	0.85	0.93	0.94	0.96	0.98	0.99
	10	0.32	0.39	0.4	0.41	0.44	0.44	0.88	0.94	0.94	0.98	1	1.02
	Clinical scores
	Days	PBS						CX3CL1
	0	0	0	0	0	0	0	0	0	0	0	0	0
	1	0	0	0	0	0	0	0	0	0	0	0	0
	2	0	0	0	0	0	0	1	1	1	1	1	1
	3	0	0	0	0	0	0	2	2	2	2	2	2
	4	0	0	0	0	1	1	2	2	3	3	3	3
	5	1	1	1	1	1	1	4	4	4.5	5	5	5
	6	1	1	1	1	1	1	6	6	8	8	8	8
	7	1	1	1.5	2	2	3	7	7	8	8	9	9
	8	2	2	2.5	3	3	4	8	9	9	9	9	10
	9	2	2	2.5	3	3.5	4	8	9	10	10	10	10
	10	2	2	3	3	4	4	8	10	10	10	10	10
Figure 4 - figure supplement 1D	Ankle thickness (mm)
	Days	PBS						CX3CL1
	0	0	0	0	0	0	0	0	0	0	0	0	0
	1	0	0	0	0	0	0	0	0	0	0	0	0
	2	0.03	0.04	0.05	0.05	0.05	0.06	0.06	0.07	0.09	0.09	0.11	0.12
	3	0.07	0.09	0.11	0.11	0.12	0.12	0.15	0.18	0.25	0.27	0.28	0.28
	4	0.13	0.15	0.16	0.16	0.16	0.17	0.26	0.31	0.33	0.35	0.38	0.39
	5	0.21	0.23	0.25	0.26	0.27	0.27	0.49	0.52	0.53	0.55	0.57	0.58
	6	0.27	0.3	0.31	0.33	0.35	0.35	0.75	0.8	0.83	0.84	0.84	0.85
	7	0.32	0.35	0.36	0.38	0.4	0.42	0.88	0.93	0.95	0.96	0.96	0.96
	8	0.35	0.4	0.41	0.42	0.43	0.44	0.94	1	1.02	1.04	1.06	1.07
	9	0.37	0.42	0.43	0.45	0.45	0.46	0.96	1.04	1.06	1.08	1.1	1.11
	Clinical scores
	Days	PBS						CX3CL1
	0	0	0	0	0	0	0	0	0	0	0	0	0
	1	0	0	0	0	0	0	0	0	0	0	0	0
	2	0	0	0	0	0	0	0	0	1	1	1	1
	3	0	0	0	0	0	0	1	1	2	2	2.5	2.5
	4	0	0.5	0.5	0.5	1	1	2	2.5	4	4	4	4
	5	0	1	2	2.5	3	3	4.5	5	5.5	5.5	6	6
	6	0	1	3	3.5	4	4.5	6.5	7	8	8.5	8.5	8.5
	7	1	3	4	4.5	4.5	4.5	7.5	8.5	9	9	9	9.5
	8	1.5	4.5	5	5	5	5	8	9	9.5	9.5	9.5	9.5
	9	2	4.5	5	5	5	5	8	9.5	10	10	10	10
Figure 4 - figure supplement 1E	Relative expression / Gapdh
	Il1b		Il4		Il6		Tnfa		Tgfb		Ccl2		Ccl3		Cxcl10
	PBS	CX3CL1	PBS	CX3CL1	PBS	CX3CL1	PBS	CX3CL1	PBS	CX3CL1	PBS	CX3CL1	PBS	CX3CL1	PBS	CX3CL1
	0.703498	2.97742	0.626206	0.593102	1.48266	2.32405	0.369905	0.263031	0.621261	0.295515	0.756332	2.52447	1.48436	2.40448	1.06744	1.43881
	1.09386	2.57772	1.15318	1.31283	0.21372	3.59529	1.59844	2.76852	0.924667	1.11438	1.63329	2.74927	0.596592	2.17176	1.53492	1.62459
	1.20264	2.24775	1.22062	1.24459	1.30362	3.47587	1.03166	3.90829	1.45407	1.10908	0.610378	2.14428	0.919048	0.79368	0.397639	1.68941
	1.14827	2.4461	1.24676	1.63927	0.94925	3.37258	1.29787	3.33755	0.71526	1.39381	1.54962	2.69968	0.65906	2.57486	1.11667	2.09829
	1.0648	2.37652	1.35343	0.634861	1.5463	2.87497	0.902743	2.76314	1.23495	1.3576	0.856291	3.8501	1.17508	0.960554	1.24397	2.3776
	1.16156	2.71973	0.48623	1.46718	1.35438	3.20043	1.41731	2.65191	0.612122	0.811736	1.15864	2.3083	1.09355	2.68049	0.939731	1.67892
Figure 4 - figure supplement 1F	Relative expression / Gapdh
	Il1b		Il4		Il6		Tnfa		Tgfb		Ccl2		Ccl3		Cxcl10
	PBS	CX3CL1	PBS	CX3CL1	PBS	CX3CL1	PBS	CX3CL1	PBS	CX3CL1	PBS	CX3CL1	PBS	CX3CL1	PBS	CX3CL1
	0.703498	2.97742	0.626206	0.593102	1.48266	2.32405	0.369905	4.26303	0.621261	0.295515	0.756332	2.52447	1.48436	2.40448	1.06744	2.43881
	1.09386	2.57772	1.15318	1.31283	0.21372	3.59529	1.59844	2.76852	0.924667	1.11438	1.63329	2.74927	0.596592	2.17176	1.53492	2.62459
	1.20264	2.24775	1.22062	1.24459	1.30362	3.47587	1.03166	3.90829	1.45407	1.10908	0.610378	2.14428	0.919048	5.79368	1.39764	2.68941
	1.30389	2.49423	1.57449	1.71122	1.10978	3.55879	0.453324	4.24704	0.960498	0.528527	0.952862	2.53897	1.31671	2.40713	1.02258	2.65841
	0.832476	3.21633	0.79751	0.36662	0.958277	3.79663	0.627432	4.29665	1.52102	0.405722	0.409701	3.1592	0.592605	2.35858	0.570113	3.41375
	0.660714	2.22055	0.935128	0.720938	1.22581	2.36497	1.07126	4.91927	1.04599	1.03807	1.19217	2.38395	0.788175	4.00394	1.18806	2.55025
