# Supplementary material for: Soluble Fas ligand drives autoantibody-induced arthritis by binding to DR5/TRAIL-R2
Source: eLife. 2021 Jul 5;10:e48840. doi: 10.7554/eLife.48840 (PMC8257255; doi:10.7554/eLife.48840)
Supplement: Figure 5—source data 1. [file elife-48840-fig5-data1.xlsx]

## Sheet: Figure 5
Figure 5B	Cell migration (%)
	Recombinants (ng/mL)	CX3CR1+ + CX3CL1 + Isotype					CX3CR1- + CX3CL1 + Isotype					CX3CR1+ + CX3CL1 + anti-CX3CR1									CX3CR1- + CX3CL1 + anti-CX3CR1				sFasL
	0	100	100	100	100	100	100	100	100	100	100	100	100	100	100	100	100	100	100	100	100	100	100	100	100	100	100
	10	157.59	134.28	152.79	173.26	184.21	96.04	118.63	127.84	132.69	138.42	137.26	142.97	148.99	132.15	147.02	135.36	139.64	132.47	143.2	104.52	105.28	107.15	110.26	100.21	100.01	100.39
	50	234.85	207.36	218.52	250.39	274.12	107.44	132.36	145.87	152.33	162.51	184.25	197.63	174.2	179.38	167.52	137.48	123.63	152.36	163.71	121.42	118.29	110.25	124.23	100.35	105.32	110.21
	100	282.54	302.33	297.46	341.21	351.2	115.31	156.99	152.17	164.21	171.29	210.42	262.39	207.68	213.21	194.72	162.3	152.17	173.84	169.42	129.48	126.42	129.31	137.13	100.39	108.69	113.27
	200	402.92	400.97	386.01	412.42	420.39	120.26	168.02	172.93	183.21	184.41	256.15	315.3	248.92	230.17	214.28	213.18	207.09	221.39	239.62	130.25	132.88	152.38	163.89	112.21	115.38	121.23
Figure 5C	Relative expression / Gapdh
	Ccl2	PBS	CX3CL1		Ccl3	PBS	CX3CL1		Cxcl10	PBS	CX3CL1
		Isotype	Isotype	anti-CX3CR1		Isotype	Isotype	anti-CX3CR1		Isotype	Isotype	anti-CX3CR1
		1.24997	1.97437	2.51888		0.71234	2.18079	1.932		0.82211	1.58234	0.9026
		0.5868	1.91	1.56843		0.49092	2.47591	1.94636		1.0726	1.27832	1.6134
		0.93043	2.74883	1.58667		1.5811	3.1541	0.07636		0.86489	1.73384	1.77102
		1.2328	2.80827	1.99604		1.21564	3.19893	0.7777		1.24041	1.06364	0.65476
		0.968349	2.50656	1.2289		0.859756	2.71322	1.75501		0.971903	2.55476	1.05387
		0.808059	2.332	1.61846		0.835634	2.56677	1.25019		0.918488	2.60928	1.30393
Figure 5D	Ccl2	PBS	CX3CL1	Ccl3	PBS	CX3CL1	Cxcl10	PBS	CX3CL1
	(pg/mL)	1832.39	5021.17	(pg/mL)	1011.4	1987.21	(pg/mL)	132.276	2536.95
		1046.09	2017.33		487.392	1863.21		153.547	1765.33
		635.263	1938.42		476.248	1521.32		143.205	1688.39
		204.985	1032.69		402.235	1026.37		214.367	1563.1
		377.468	877.634		387.541	1039.51		150.974	1221.45
		569.207	1135.33		325.32	874.257		168.005	532.485
Figure 5E	Cell migation (%)
	PBS	sFasL	CX3CL1
	28.3	26.7	87.35
	25.7	24.9	78.2
	18.2	19.6	75.6
	17.6	17.5	56.7
