# Supplementary material for: Soluble Fas ligand drives autoantibody-induced arthritis by binding to DR5/TRAIL-R2
Source: eLife. 2021 Jul 5;10:e48840. doi: 10.7554/eLife.48840 (PMC8257255; doi:10.7554/eLife.48840)
Supplement: Figure 6—source data 1. [file elife-48840-fig6-data1.xlsx]

## Sheet: Figure 6
Figure 6A	Ankle thickness (mm)														Clinical scores
	Days	Isotype						anti-FasL							Days	Isotype						anti-FasL
	0	0	0	0	0	0	0	0	0	0	0	0	0		0	0	0	0	0	0	0	0	0	0	0	0	0
	1	0.11	0.13	0.14	0.14	0.14	0.14	0	0	0.06	0.13	0.14	0.15		1	2	2	2.5	3	3	3.5	1	1	1.5	2	2	2.5
	2	0.23	0.27	0.28	0.29	0.35	0.5	0.08	0.13	0.19	0.25	0.28	0.3		2	4.5	4.5	5.5	6	6.5	6.5	2	2.5	2.5	3	3	3.5
	3	0.36	0.42	0.49	0.51	0.54	0.58	0.23	0.26	0.27	0.28	0.29	0.3		3	6	6	6.5	7	7	7	3	3	3	3	3	3.5
	4	0.51	0.52	0.54	0.58	0.59	0.6	0.23	0.29	0.35	0.38	0.4	0.42		4	7	7	7	7	7	7.5	2	2	2.5	2.5	3	3
	5	0.57	0.6	0.61	0.64	0.65	0.67	0.23	0.32	0.42	0.48	0.5	0.51		5	7	7	7.5	8	8	8	2	2.5	2.5	3	3.5	3.5
	6	0.74	0.76	0.77	0.78	0.8	0.82	0.3	0.38	0.43	0.48	0.52	0.54		6	9	9	9.5	10	10	10	2	2.5	3	4	4	4
	7	0.81	0.89	0.94	0.99	0.99	1	0.37	0.42	0.46	0.48	0.52	0.54		7	10	10	10.5	11.5	11.5	11.5	2	3	3.5	4	4	4
	8	0.91	0.93	0.95	0.99	0.99	0.99	0.37	0.44	0.48	0.48	0.53	0.55		8	11	11	11	11	11.5	11.5	3	3.5	4	4	4	4.5
	9	0.93	0.96	0.98	0.99	0.99	1	0.37	0.46	0.48	0.48	0.54	0.55		9	11	11.5	11.5	12	12	12	3	3.5	4	4	4.5	4.5
Figure 6B	Ankle thickness (mm)														Clinical scores
	Days	Isotype						anti-FasL							Days	Isotype						anti-FasL
	0	0	0	0	0	0	0	0	0	0	0	0	0		0	0	0	0	0	0	0	0	0	0	0	0	0
	1	0.02	0.04	0.05	0.06	0.07	0.08	0.02	0.01	0.01	0.03	0.02	0.01		1	1	1	1	1	1	1.5	2	2	1.5	1.5	1	1
	2	0.05	0.08	0.1	0.12	0.15	0.15	0.05	0.03	0.02	0.06	0.09	0.11		2	1	1	1.5	2	2	2	3	1.5	2	2	1.5	1.5
	3	0.2	0.25	0.28	0.3	0.3	0.29	0.08	0.11	0.13	0.235	0.38	0.37		3	3	3	3	3	3	3.5	4	5	3	2.5	4	3
	4	0.25	0.36	0.39	0.45	0.47	0.49	0.11	0.16	0.29	0.31	0.39	0.41		4	4	4	4.5	5	5	5	6	4	3.5	3.5	4	4
	5	0.78	0.82	0.84	0.84	0.86	0.88	0.185	0.2	0.26	0.48	0.45	0.49		5	6	6	7	8	8	8	4	5	5	4	4.5	5
	6	0.98	1	1.12	1.18	1.19	1.19	0.26	0.25	0.33	0.53	0.5	0.51		6	8	9	10	10	10	10.5	3	5	4	4	4.5	5
	7	1.25	1.31	1.38	1.39	1.4	1.41	0.26	0.24	0.36	0.38	0.44	0.52		7	10	10.5	11	11	11	11.5	4	5	4.5	3.5	4	5
	8	1.37	1.37	1.38	1.4	1.41	1.41	0.26	0.24	0.31	0.38	0.44	0.54		8	10	10	11	11	11.5	11.5	5	5	5	4.5	5	5
	9	1.37	1.37	1.39	1.39	1.41	1.41	0.26	0.29	0.31	0.42	0.46	0.53		9	10	10	10	10	11	11.5	4	5	5	5	5	5
Figure 6C	Ankle thickness (mm)														Clinical scores
	Days	Isotype						anti-FasL							Days	Isotype						anti-FasL
	0	0	0	0	0	0	0	0	0	0	0	0	0		0	0	0	0	0	0	0	0	0	0	0	0	0
	1	0	0	0	0	0.01	0.01	0	0	0	0	0	0		1	0	0	0	0	0	0	0	0	0	1	1	1
	2	0	0	0	0.01	0.02	0.02	0.03	0.03	0.04	0.04	0.05	0.05		2	0	0	1	1	1	1.5	0	0	1	1.5	2	2
	3	0.05	0.05	0.06	0.07	0.085	0.11	0.07	0.07	0.08	0.08	0.09	0.1		3	3	2.5	2.5	3	3	3	3	3	3	3	2.5	3
	4	0.09	0.11	0.14	0.16	0.19	0.2	0.1	0.1	0.15	0.17	0.19	0.21		4	4.5	4.5	5	5	6	5.5	5	5	5.5	5.5	6	6
	5	0.09	0.12	0.16	0.19	0.23	0.24	0.14	0.19	0.23	0.27	0.29	0.32		5	7.5	7.5	8	8	8.5	8.5	7.5	8	8	8.5	9.5	10
	6	0.51	0.51	0.51	0.51	0.51	0.51	0.4	0.44	0.49	0.53	0.55	0.57		6	9.5	10	10	10	10.5	10.5	10	10.5	10.5	10.5	10.5	11
	7	0.57	0.57	0.58	0.58	0.58	0.59	0.55	0.59	0.6	0.61	0.62	0.63		7	10	11	11	11.5	11.5	11.5	11	11	10	10.5	11	11.5
	8	0.57	0.58	0.62	0.65	0.65	0.67	0.53	0.53	0.53	0.53	0.53	0.53		8	9.5	10	11.5	11.5	11	11	8	9	5.5	6	7	8
	9	0.67	0.69	0.73	0.74	0.74	0.75	0.33	0.33	0.33	0.33	0.33	0.33		9	10	11	11	11	11.5	11.5	4.5	4	4.5	5	5	5.5
	10	0.68	0.69	0.72	0.72	0.74	0.74	0.29	0.32	0.36	0.37	0.38	0.38		10	9.5	11	11	11.5	10	11.5	4	4	5	5	5.5	5
																9.5	11	11	11.5	10	11	4	4	5.5	5	6	5
Figure 6D	Ankle thickness (mm)														Clinical scores
	Days	Isotype					anti-CX3CR1								Days	Isotype				anti-CX3CR1
	0	0	0	0	0		0	0	0	0					0	0	0	0	0	0	0	0	0
	1	0.11	0.13	0.13	0.14		0	0.02	0.01	0.03					1	2	2	3	3	1	1.5	2	2
	2	0.17	0.17	0.21	0.24		0.02	0.04	0.01	0.02					2	4.5	4.5	5.5	6	2	2	3	3
	3	0.21	0.36	0.34	0.35		0.07	0.05	0.06	0.05					3	6	6	7	7	3	3	3	3
	4	0.3	0.45	0.6	0.55		0.09	0.07	0.05	0.03					4	7	7	7	7	2	2.5	3	3
	5	0.4	0.55	0.65	0.65		0.09	0.08	0.05	0.04					5	7	7	7.5	8	2	3	3	3
	6	0.5	0.7	0.75	0.7		0.09	0.03	0.04	0.02					6	9	9	9.5	10	2	3	3.5	4
	7	0.5	0.7	0.65	0.65		0.09	0.04	0.05	0.03					7	10	10.5	11	11.5	2	3.5	4	4
	8	0.5	0.75	0.75	0.8		0.09	0.2	0.17	0.4					8	11	11	11	11	3	3	3.5	4
	9	0.7	0.75	0.8	0.8		0.21	0.2	0.3	0.28					9	11	11	11.5	12	3	3	3.5	4
Figure 6E	Ankle thickness (mm)														Clinical scores
	Days	Isotype					anti-CX3CR1								Days	Isotype				anti-CX3CR1
	0	0	0	0	0		0	0	0	0					0	0	0	0	0	0	0	0	0
	1	0	0	0	0.02		0	0	0	0.01					1	1	1	1	1	1	1	1	1
	2	0	0	0	0.03		0	0	0	0.03					2	1	1	1.5	1.5	1	1	1.5	1.5
	3	0	0	0	0.06		0	0	0	0.05					3	1	1.5	1.5	1.5	1	1	1.5	1.5
	4	0.16	0.26	0.19	0.31		0.16	0.21	0.28	0.24					4	3.5	4	4.5	5	3.5	4	5	5
	5	0.83	0.915	0.95	1		0.25	0.31	0.35	0.41					5	8	8.5	9	9	5	5	5	5
	6	0.93	1.06	1.06	1.18		0.13	0.18	0.19	0.38					6	10	10	10	10	3	3.5	4	4
	7	1.03	1.22	1.28	1.35		0	0.03	0.08	0.11					7	10	10	11	12	2	3	3	3
	8	1.03	1.31	1.39	1.52		0	0.06	0.08	0.09					8	11	11	11	11	2	2	2	2
	9	1.03	1.4	1.45	1.55		0.08	0.08	0.06	0.05					9	11	11	11.5	12	1	1	1.5	1
Figure 6F	Ankle thickness (mm)														Clinical scores
	Days	Isotype					anti-CX3CR1								Days	Isotype				anti-CX3CR1
	0	0	0	0	0		0	0	0	0					0	0	0	0	0	0	0	0	0
	1	0	0	0	0.01		0	0	0	0					1	1	1	1	1	1	1	1	1
	2	0	0	0.01	0.02		0.04	0.04	0.04	0.05					2	1	1	1	2	2	2	2	2
	3	0.04	0.05	0.06	0.09		0.07	0.09	0.09	0.1					3	3	3	3.5	3.5	3	3	3	3
	4	0.09	0.11	0.16	0.2		0.2	0.2	0.21	0.22					4	4	4	4	4	5	5	5	5
	5	0.25	0.26	0.27	0.29		0.25	0.27	0.29	0.31					5	6	6	6	6	6	6	6	6
	6	0.51	0.51	0.51	0.51		0.4	0.43	0.49	0.52					6	7	7	7	7	6	6	6.5	7
	7	0.57	0.58	0.64	0.68		0.55	0.57	0.59	0.63					7	8	8	8	8	8	8	8	8
	8	0.77	0.82	0.84	0.85		0.53	0.53	0.54	0.55					8	9	9	9.5	10	7	7	6.5	7
	9	0.82	0.87	0.87	0.89		0.32	0.39	0.41	0.42					9	11	11	11	11	6	5	5	5.5

## Sheet: Figure 6 - figure supplement 1
Figure 6 - figure supplement 1A	Relative expression / Gapdh	Isotype						anti-FasL
	Cx3cl1	1.09723	1.12194	0.758887	0.924792	1.10847	0.988671	0.7828	0.257913	0.0706	0.931326	0.552438	0.373464
	Ccl2	0.773371	0.860678	1.13091	1.0899	0.95023	1.19491	0.253762	0.254267	0.336118	0.697752	0.913293	0.44032
	Ccl3	1.21399	1.03999	1.08427	0.915237	0.860847	0.885668	0.471258	0.263948	0.279789	0.882078	0.182277	0.440302
	Cxcl10	1.0531	1.1849	0.810445	1.08746	1.11196	0.75213	0.827121	0.480371	0.555425	0.628533	0.446049	0.340498
Figure 6 - figure supplement 1B	Relative expression / Gapdh	Isotype						anti-FasL
	Cx3cl1	1.15568	1.28297	0.70754	1.4115	0.520921	0.921384	0.615997	0.422118	0.499762	0.026995	0.680616	0.186308
	Ccl2	1.33041	1.02643	0.887318	0.889085	1.17529	0.69147	0.262557	0.45827	0.879942	0.326548	0.334255	0.579313
	Ccl3	1.35605	1.08414	1.05531	0.699711	1.00559	0.799195	0.501585	1.09999	0.845918	0.346499	0.443735	0.470366
	Cxcl10	1.18163	0.790089	1.20494	1.08632	0.71142	1.0256	0.11051	0.598201	0.474826	0.630558	0.369526	0.409214
Figure 6 - figure supplement 1C	Relative expression / Gapdh	Isotype						anti-FasL
	Cx3cl1	0.724301	0.868162	0.774332	0.980363	1.24831	1.40453	0.036182	0.163984	0.411346	0.28188	0.658969	0.508059
	Ccl2	1.16518	1.04231	1.37387	0.719379	0.789607	0.909647	0.863898	0.834803	0.463324	0.582675	0.53591	0.470908
	Ccl3	1.12309	1.32138	0.773162	0.916652	1.04469	0.821021	0.579895	0.485815	0.712906	0.802439	0.684682	0.576423
	Cxcl10	0.771506	0.889334	1.01172	1.03894	1.01711	1.27139	0.11032	0.819448	0.431733	0.537691	0.330341	1.06585
Figure 6 - figure supplement 1D	Relative expression / Gapdh	Isotype						anti-CX3CR1
	Ccl2	0.572983	1.02702	0.859475	1.54052			0.19494	0.213939	0.469186	0.141531
	Ccl3	1.13984	1.00049	0.771108	1.08856			0.766457	0.327781	0.151495	0.120092
	Cxcl10	0.779113	1.1292	0.833026	1.25866			0.447965	0.117234	0.192534	0.817043
Figure 6 - figure supplement 1E	Relative expression / Gapdh	Isotype						anti-CX3CR1
	Ccl2	1.02918	0.957519	1.04103	0.972271			0.349103	0.212	0.857413	0.425564
	Ccl3	1.083	1.01147	0.9094	0.996125			0.585456	0.538821	0.721867	0.801118
	Cxcl10	1.04109	0.958164	1.03201	0.968738			0.626125	0.33281	0.139501	0.568269
Figure 6 - figure supplement 1F	Relative expression / Gapdh	Isotype						anti-CX3CR1
	Ccl2	0.713572	1.15674	1.21842	0.911278			0.53365	0.842134	0.286877	0.419936
	Ccl3	1.43078	0.889804	0.7576	0.921812			0.64453	0.278819	0.433937	0.612582
	Cxcl10	1.12451	0.987034	1.03351	0.854945			0.598312	0.438285	0.904018	0.05959
